# Supplementary material for: Tunable electrochemical diverse sulfurization of sulfoxonium ylides with disulfides
Source: Royal Society of Chemistry journal article supplement (doi:10.1039/d4cc02479f), 2024-01-01

## Supporting Information

### **Tunable Electrochemical Diverse Sulfurization of Sulfoxonium Ylides with Disulfides**

Xinwei Hu,<sup>‡</sup> Kaihui Zhong,<sup>‡</sup> Zhixiong Ruan<sup>\*</sup>

Guangdong Provincial Key Laboratory of Molecular Target & Clinical Pharmacology and the State Key Laboratory of Respiratory Disease, School of Pharmaceutical Sciences, Guangzhou Medical University, Guangzhou, 511436, P.R.China

<sup>‡</sup> These authors contributed equally to this work.

Email: [zruan@gzhmu.edu.cn](mailto:zruan@gzhmu.edu.cn)

## Table of Contents

|                                                                                                |    |
|------------------------------------------------------------------------------------------------|----|
| General Remarks                                                                                | 2  |
| Optimization Studies                                                                           | 3  |
| General Procedures                                                                             | 5  |
| Characterization Data of Products <b>3a-3z-2</b> , <b>4a-4q</b> , <b>5a-5d</b> and <b>6-12</b> | 8  |
| Gram-scale Synthesis                                                                           | 29 |
| Synthetic Application                                                                          | 30 |
| Control Experiments and Mechanism Studies                                                      | 33 |
| Cyclic Voltammetry Experiments                                                                 | 35 |
| Crystallographic description of <b>3s</b> and <b>4a</b>                                        | 36 |
| References                                                                                     | 42 |
| NMR Spectra                                                                                    | 43 |

## General Remarks

Electrochemical reactions were conducted using an AXIOMET AX-3003P potentiostat in constant current mode using undivided cell equipped with graphite plate (1.0 cm × 1.0 cm × 0.2 cm) as the anode and platinum plate (1.0 cm × 1.0 cm × 0.01 cm) as the cathode under air. Graphite plates are commercially available from Bei Jing Jinglong Special Carbon Technology Co., Ltd. Platinum electrodes are commercially available from Tian Jin Aida (China). Chemicals were obtained from commercial sources and were used without further purification. Yields refer to isolated compounds, estimated to be >95% pure as determined by <sup>1</sup>H-NMR. TLC: Macherey-Nagel, TLC plates Alugram®Sil G/UV254. Detection under UV light at 254 nm. Chromatography separations were carried out on silica gel 60H (200-300 mesh) manufactured by Qingdao Haiyang Chemical Group Co. (China). High resolution mass spectrometry (HRMS) was measured on Thermo-DFS mass spectrometer (Q Exactive Focus). NMR spectra were recorded on JEOL 400 NMR (<sup>1</sup>H 400 MHz; <sup>13</sup>C 100 MHz) in DMSO or CDCl<sub>3</sub>. If not otherwise specified, chemical shifts ( $\delta$ ) are given in ppm. All sulfides were purchased from TCI, Meryer or Macklin.

## The devices of electrochemical reaction

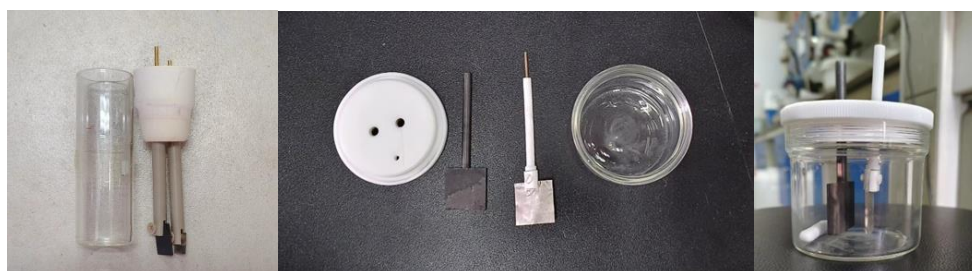

(a)

(b)

**Figure S1.** (a) Equipment of standard reaction; (b) Equipment of gram-scale reaction.

## Optimization Studies

**Table S1. Optimization of Electrochemical Reaction Conditions<sup>a</sup>**

| Entry    | Deviation from standard conditions                                                  | Yield (%) <sup>b</sup> |
|----------|-------------------------------------------------------------------------------------|------------------------|
| <b>1</b> | <b>None</b>                                                                         | <b>82</b>              |
| 2        | No current                                                                          | NR                     |
| 3        | No <i>n</i> -Bu <sub>4</sub> NI                                                     | NR                     |
| 4        | <i>n</i> -Bu <sub>4</sub> NBF <sub>4</sub> instead of <i>n</i> -Bu <sub>4</sub> NI  | Messy                  |
| 5        | <i>n</i> -Bu <sub>4</sub> NPF <sub>6</sub> instead of <i>n</i> -Bu <sub>4</sub> NI  | 31                     |
| 6        | <i>n</i> -Bu <sub>4</sub> NHSO <sub>4</sub> instead of <i>n</i> -Bu <sub>4</sub> NI | Messy                  |
| 7        | 2 mA                                                                                | 37                     |
| 8        | MeOH as solvent                                                                     | 17                     |
| 9        | MeCN as solvent                                                                     | 60                     |
| 10       | DCM/HFIP (20:1) as solvent                                                          | 50                     |
| 11       | Graphite instead of Pt                                                              | 45                     |

<sup>a</sup> Reaction conditions: Undivided cell, graphite anode (1.5 cm × 1.0 cm × 0.2 cm), Pt cathode (1.5 cm × 1.0 cm × 0.01 cm), **1a** (0.5 mmol), **2a** (0.6 mmol), *n*-Bu<sub>4</sub>NI (0.5 mmol), DCM (6 mL), constant current = 4.0 mA, 8.0 h (2.4 *F*), RT, under air. <sup>b</sup> Yields of isolated products.

**Table S2. Optimization of Electrochemical Reaction Conditions<sup>a</sup>**

| Entry    | Deviation from standard conditions | Yield (%) <sup>b</sup> |
|----------|------------------------------------|------------------------|
| <b>1</b> | <b>None</b>                        | <b>73</b>              |



|    |                                                                                     |       |
|----|-------------------------------------------------------------------------------------|-------|
| 2  | No current                                                                          | NR    |
| 3  | No NH <sub>4</sub> I                                                                | NR    |
| 4  | 1.0 equiv NH <sub>4</sub> I                                                         | 36    |
| 5  | 2 h                                                                                 | 59    |
| 6  | <i>n</i> -Bu <sub>4</sub> NI instead of NH <sub>4</sub> I                           | 53    |
| 7  | <i>n</i> -Bu <sub>4</sub> NPF <sub>6</sub> instead of <i>n</i> -Bu <sub>4</sub> NI  | 53    |
| 8  | <i>n</i> -Bu <sub>4</sub> NHSO <sub>4</sub> instead of <i>n</i> -Bu <sub>4</sub> NI | 50    |
| 9  | DCM/HFIP (20:1) instead of HFIP                                                     | Trace |
| 10 | DCM/HFIP (1:1) instead of HFIP                                                      | 25    |
| 11 | MeOH instead of HFIP                                                                | NR    |

<sup>a</sup> Reaction conditions: Undivided cell, graphite anode (1.5 cm × 1.0 cm × 0.2 cm), Pt cathode (1.5 cm × 1.0 cm × 0.01 cm), **1a** (0.5 mmol), **2a** (0.6 mmol), NH<sub>4</sub>I (0.75 mmol), HFIP (6 mL), constant current = 4.0 mA, 4.0 h (1.2 *F*), RT, under air. <sup>b</sup> Yields of isolated products.

## General Procedure

The substrates **1a-1z**<sup>[1]</sup> were synthesized according to previously described methods as follows.

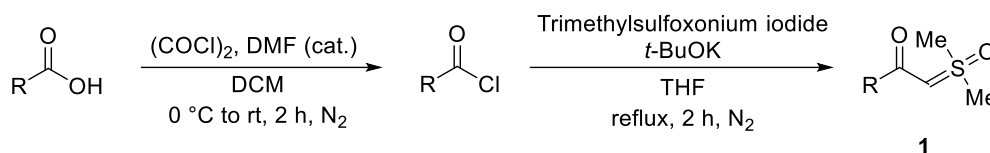

To a solution of carboxylic acid compound (5.0 mmol, 1.0 equiv) in DCM (30 mL) at 0 °C under N<sub>2</sub> was added dropwise of (COCl)<sub>2</sub> (10 mmol, 2.0 equiv) followed by a catalytic amount of dry DMF. The reaction was allowed to stir at room temperature until completion. The solvent was then removed under reduce pressure to afford the corresponding crude acid chloride.

To a solution of potassium *tert*-butoxide (15 mmol, 3.0 equiv) in anhydrous THF (25 mL) under argon atmosphere, trimethylsulfoxonium iodide (10 mmol; 2.0 equiv) was added. After refluxing at 80 °C for 2 h, the reaction mixture were cooled at 0 °C, followed by slow addition of the crude acid chloride diluted with anhydrous THF. After that, the reaction mixture temperature was naturally increased to room time and stirred overnight. The solvent was then removed on a rotary evaporator. The resulting mixture was added to 60 mL H<sub>2</sub>O and extracted with CH<sub>2</sub>Cl<sub>2</sub>: *i*-PrOH(3:1) mixture (160 mL). After washing with water for three times, the organic phase was dried over Na<sub>2</sub>SO<sub>4</sub> and concentrated in vacuo to afford the corresponding sulfoxonium ylides **1a-1z**.

Preparation of **5c** with **4a** and 1,3-diphenylpropane-1,3-dione (**S1**)<sup>[2]</sup>

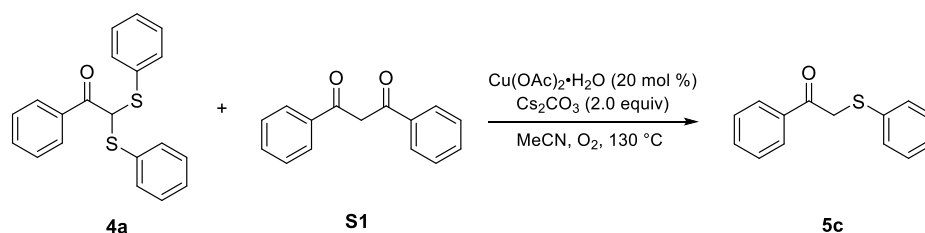

To a solution of compound **4a** (2.0 mmol, 673 mg) in 1,3-diphenylpropane-1,3-dione (**S1**) (2.0 mmol, 448 mg), was added Cs<sub>2</sub>CO<sub>3</sub> (4.0 mmol, 1.3 g) and Cu(OAc)<sub>2</sub> (0.4 mmol, 79.9 mg). The solution was stirred for 24 h at 130 °C. Upon completion, the solvent was removed directly under reduced pressure to afford the crude product, which was further purified by flash column chromatography (PE/EtOAc: 15/1) to give a

yellow liquid **5c** (410 mg, 90%).

Preparation of **5d** with **1a** and 2,6-dimethylbenzenethiol (**2f**)<sup>[3]</sup>

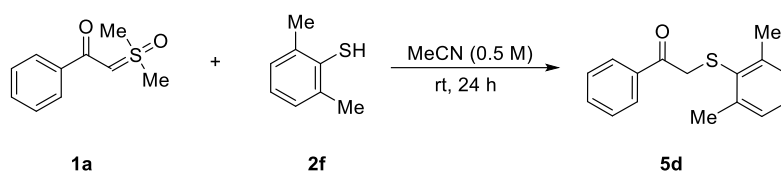

To a solution of compound **1a** (5.0 mmol, 981 mg) in MeCN (5 mL) was added 2,6-dimethylbenzenethiol (**2f**) (5.0 mmol, 0.67 mL). The reaction mixture was stirred for 24 h at room temperature. Then, the crude compound was purified by flash column chromatography (PE/EA: 15/1) to give a yellow liquid **5d** (833 mg, 65%).

General Procedure for Electrochemical Reactions

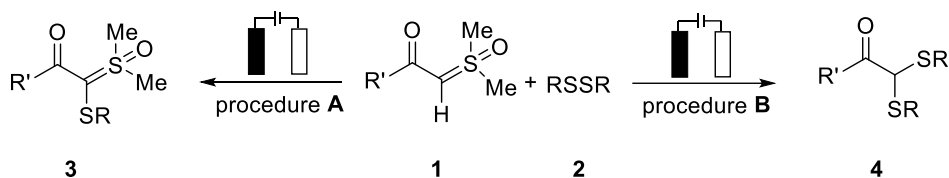

**Procedure A:** In an undivided cell (30 mL) equipped with a stirring bar, a mixture of substrates **1** (0.5 mmol), **2** (0.6 mmol), *n*-Bu<sub>4</sub>NI (0.5 mmol, 185 mg) and DCM (6 mL) were added. The cell was equipped with graphite (1.5 cm × 1.0 cm × 0.2 cm) as the anode and platinum plate (1.5 cm × 1.0 cm × 0.01 cm) as the cathode and connected to a DC regulated power supply. The reaction mixture was stirred and electrolyzed at a constant current of 4 mA at room temperature for 8 h. Upon completion, the solvent was further removed directly under reduced pressure to afford the crude product, which was purified by flash column chromatography afford the desired products **3a-3z**.

**Procedure B:** In an undivided cell (30 mL) equipped with a stirring bar, a mixture of substrates **1** (0.5 mmol), **2** (0.6 mmol), NH<sub>4</sub>I (0.75 mmol, 0.109 mg) and HFIP (6 mL) were added. The cell was equipped with graphite (1.5 cm × 1.0 cm × 0.2 cm) as the anode and platinum plate (1.5 cm × 1.0 cm × 0.01 cm) as the cathode and connected to a DC regulated power supply. The reaction mixture was stirred and electrolyzed at a constant current of 4 mA at room temperature for 4 h. Upon completion, the solvent was further removed directly under reduced pressure to afford the crude product, which was purified by flash column chromatography afford the desired products **4a-4l**. Notely,

products of **4m**, **4n**, **4o**, and **4p** need to undergo a room-temperature reaction for 4 h.

## Characterization Data of Products 3a-3z-2, 4a-4q, 5a-5d and 6-12.

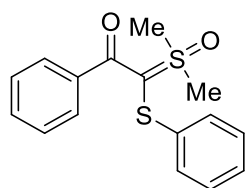

### 2-(Dimethyl(oxo)- $\lambda^6$ -sulfaneylidene)-1-phenyl-2-(phenylthio)ethan-1-one (3a):

Compound **3a** (121 mg, 80%) (PE/EA = 1/2) was prepared using the general procedure A and isolated as yellow solid. m.p. 90–92 °C  $^1\text{H}$  NMR (400 MHz, DMSO- $d_6$ )  $\delta$  = 7.47 (d,  $J$  = 6.9 Hz, 2H), 7.35 – 7.21 (m, 7H), 7.07 (dd,  $J$  = 7.2, 7.2 Hz, 1H), 3.73 (s, 3H), 3.66 (s, 3H).  $^{13}\text{C}$  NMR (100 MHz, DMSO- $d_6$ )  $\delta$  189.2, 141.8, 140.8, 130.1, 129.6, 127.9, 127.7, 125.6, 124.2, 76.7, 42.0, 41.6. HR-MS (ESI)  $m/z$  calcd for  $\text{C}_{16}\text{H}_{17}\text{O}_2\text{S}_2$   $[\text{M}+\text{H}]^+$  305.0664, found 305.0665.

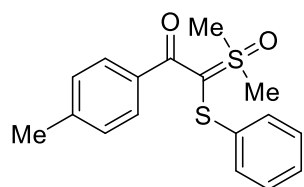

### 2-(Dimethyl(oxo)- $\lambda^6$ -sulfaneylidene)-2-(phenylthio)-1-(*p*-tolyl)ethan-1-one (3b):

Compound **3b** (92 mg, 58%) (PE/EA = 1/2) was prepared using the general procedure A and isolated as white solid. m.p. 125–127 °C.  $^1\text{H}$  NMR (400 MHz, DMSO- $d_6$ )  $\delta$  = 7.42 (d,  $J$  = 7.9 Hz, 2H), 7.32 – 7.27 (m, 2H), 7.24 – 7.21 (m, 2H), 7.11 (dd,  $J$  = 7.2, 7.2 Hz, 1H), 7.06 (d,  $J$  = 7.8 Hz, 2H), 3.72 (s, 3H), 3.65 (s, 3H), 2.25 (s, 3H).  $^{13}\text{C}$  NMR (100 MHz, DMSO- $d_6$ )  $\delta$  189.0, 141.9, 139.8, 137.9, 129.6, 128.5, 127.9, 125.5, 124.2, 76.5, 42.1, 41.8, 21.4. HR-MS (ESI)  $m/z$  calcd for  $\text{C}_{17}\text{H}_{19}\text{O}_2\text{S}_2$   $[\text{M}+\text{H}]^+$  319.0821, found 319.0820.

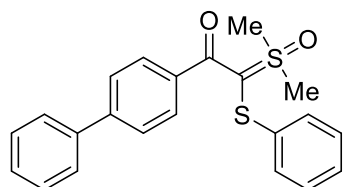

**1-([1,1'-Biphenyl]-4-yl)-2-(dimethyl(oxo)- $\lambda^6$ -sulfaneylidene)-2-(phenylthio)ethan-1-one (3c):** Compound **3c** (143 mg, 75%) (PE/EA = 1/2) was prepared using the general procedure A and isolated as yellow liquid.  $^1\text{H}$  NMR (400 MHz, DMSO- $d_6$ )  $\delta$  7.65 (d,  $J$  = 7.3 Hz, 2H), 7.60 – 7.56 (m, 4H), 7.43 (dd,  $J$  = 8.3, 6.8 Hz, 2H), 7.36 – 7.25 (m, 5H),

7.15 – 7.11 (m, 1H), 3.75 (s, 3H), 3.68 (s, 3H). <sup>13</sup>C NMR (100 MHz, DMSO-*D*<sub>6</sub>) δ 188.7, 141.9, 141.8, 140.0, 139.8, 129.7, 129.5, 128.7, 128.3, 127.3, 126.3, 125.7, 124.3, 76.9, 42.1, 41.7. HR-MS(ESI) *m/z* calcd for C<sub>22</sub>H<sub>21</sub>O<sub>2</sub>S<sub>2</sub> [M+H]<sup>+</sup> 381.0970, found 381.0977.

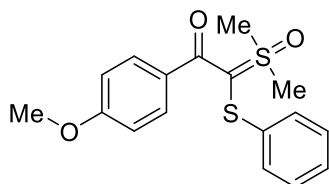

**2-(Dimethyl(oxo)-λ<sup>6</sup>-sulfaneylidene)-1-(4-methoxyphenyl)-2-(phenylthio)ethan-1-one (3d):** Compound **3d** (102 mg, 61%) (PE/EA = 1/2) was prepared using the general procedure A and isolated as yellow solid. m.p. 80–82 °C. <sup>1</sup>H NMR (400 MHz, DMSO-*d*<sub>6</sub>) δ = 7.56 (d, *J* = 8.8 Hz, 2H), 7.33 – 7.28 (m, 2H), 7.26 – 7.23 (m, 2H), 7.12 (dd, *J* = 7.2, 7.2 Hz, 1H), 6.81 (d, *J* = 8.7 Hz, 2H), 3.71 (d, *J* = 2.2 Hz, 6H), 3.65 (s, 3H). <sup>13</sup>C NMR (100 MHz, DMSO-*d*<sub>6</sub>) δ 188.1, 161.1, 142.0, 132.7, 130.0, 129.6, 125.6, 124.2, 113.2, 76.1, 55.7, 42.1, 41.8. HR-MS(ESI) *m/z* calcd for C<sub>17</sub>H<sub>19</sub>O<sub>3</sub>S<sub>2</sub> [M+H]<sup>+</sup> 335.0770, found 335.0771.

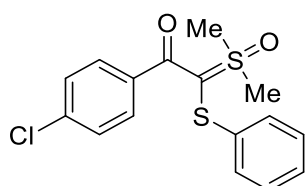

**1-(4-Chlorophenyl)-2-(dimethyl(oxo)-λ<sup>6</sup>-sulfaneylidene)-2-(phenylthio)ethan-1-one (3e):** Compound **3e** (122 mg, 72%) (PE/EA = 1/2) was prepared using the general procedure A and isolated as yellow liquid. <sup>1</sup>H NMR (400 MHz, DMSO-*d*<sub>6</sub>) δ = 7.49 (d, *J* = 8.3 Hz, 2H), 7.31 – 7.23 (m, 4H), 7.17 (d, *J* = 7.5 Hz, 2H), 7.08 (dd, *J* = 8.0, 8.0, 1H), 3.70 (s, 3H), 3.61 (s, 3H). <sup>13</sup>C NMR (100 MHz, DMSO-*d*<sub>6</sub>) δ 187.8, 141.5, 139.6, 134.7, 129.7, 129.6, 128.1, 125.7, 124.2, 77.1, 41.9, 41.5. HR-MS (ESI) *m/z* calcd for C<sub>16</sub>H<sub>16</sub>ClO<sub>2</sub>S<sub>2</sub> [M+H]<sup>+</sup> 339.0275, found 339.0273.

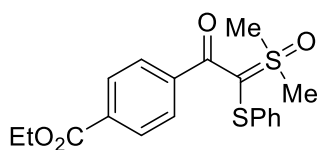

**Ethyl 4-(2-(dimethyl(oxo)-λ<sup>6</sup>-sulfaneylidene)-2-(phenylthio)acetyl)benzoate (3f):** Compound **3f** (134 mg, 71%) (PE/EA = 1/2) was prepared using the general procedure

A and isolated as a yellow liquid.  $^1\text{H}$  NMR (400 MHz, DMSO- $d_6$ )  $\delta$  = 7.94 (d,  $J$  = 7.3 Hz, 2H), 7.64 (d,  $J$  = 7.8 Hz, 2H), 7.43 – 7.21 (m, 5H), 4.40 – 4.35 (m, 2H), 3.87 (s, 3H), 3.78 (s, 3H), 1.40 (d,  $J$  = 6.8 Hz, 3H).  $^{13}\text{C}$  NMR (100 MHz, DMSO- $D_6$ )  $\delta$  188.5, 166.0, 145.7, 141.5, 131.0, 129.7, 129.0, 127.9, 125.8, 124.4, 77.6, 61.5, 42.0, 41.6, 14.8. HR-MS (ESI)  $m/z$  calcd for  $\text{C}_{19}\text{H}_{21}\text{O}_4\text{S}_2$   $[\text{M}+\text{H}]^+$  377.0876, found 377.0868.

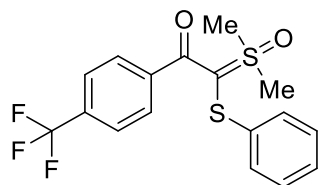

**2-(Dimethyl(oxo)- $\lambda^6$ -sulfaneylidene)-2-(phenylthio)-1-(4-(trifluoromethyl)phenyl)ethan-1-one (3g):** Compound **3g** (150 mg, 81%) (PE/EA = 1/2) was prepared using the general procedure A and isolated as yellow solid. m.p. 80–82 °C.  $^1\text{H}$  NMR (400 MHz, DMSO- $d_6$ )  $\delta$  = 7.63 (d,  $J$  = 2.4 Hz, 4H), 7.32 – 7.27 (m, 2H), 7.24 – 7.21 (m, 2H), 7.15 – 7.10 (m, 1H), 3.78 (d,  $J$  = 2.4 Hz, 3H), 3.68 (d,  $J$  = 2.5 Hz, 3H).  $^{13}\text{C}$  NMR (100 MHz, DMSO- $d_6$ )  $\delta$  187.9, 145.1, 141.3, 129.9 (q,  $^2J_{\text{C-F}}$  = 31.6 Hz), 129.7, 128.3, 125.8, 125.1 (q,  $^3J_{\text{C-F}}$  = 3.8 Hz), 124.5 (d,  $^1J_{\text{C-F}}$  = 272.7 Hz), 124.2, 123.2, 77.5, 41.9, 41.4.  $^{19}\text{F}$  NMR (376 MHz, DMSO- $d_6$ )  $\delta$  -60.8 (s). HR-MS (ESI)  $m/z$  calcd for  $\text{C}_{17}\text{H}_{16}\text{F}_3\text{O}_2\text{S}_2$   $[\text{M}+\text{H}]^+$  373.0538, found 373.0535.

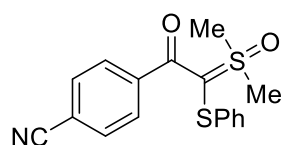

**4-(2-(Dimethyl(oxo)- $\lambda^6$ -sulfaneylidene)-2-(phenylthio)acetyl)benzonitrile (3h):** Compound **3h** (135 mg, 82%) (PE/EA = 1/2) was prepared using the general procedure A and isolated as a yellow liquid.  $^1\text{H}$  NMR (400 MHz, DMSO- $d_6$ )  $\delta$  = 7.75 (d,  $J$  = 8.2 Hz, 2H), 7.56 (d,  $J$  = 8.2 Hz, 2H), 7.32 – 7.28 (m, 2H), 7.21 (dd,  $J$  = 8.4, 1.0 Hz, 2H), 7.18 – 7.08 (m, 1H), 3.76 (s, 3H), 3.67 (s, 3H).  $^{13}\text{C}$  NMR (101 MHz, DMSO- $D_6$ )  $\delta$  187.5, 145.6, 141.2, 132.2, 129.7, 128.4, 125.9, 124.4, 119.1, 112.4, 77.8, 41.9, 41.5. HR-MS (ESI)  $m/z$  calcd for  $\text{C}_{17}\text{H}_{16}\text{NO}_2\text{S}_2$   $[\text{M}+\text{H}]^+$  330.0617, found 330.0611.

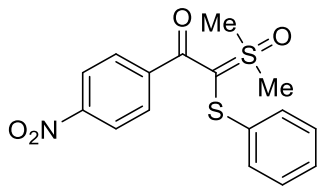

**2-(Dimethyl(oxo)- $\lambda^6$ -sulfaneylidene)-1-(4-nitrophenyl)-2-(phenylthio)ethan-1-one**

**(3i):** Compound **3i** (129 mg, 74%) (PE/EA = 1/2) was prepared using the general procedure A and isolated as yellow liquid.  $^1\text{H}$  NMR (400 MHz, DMSO- $d_6$ )  $\delta$  = 8.13 (d,  $J$  = 8.7 Hz, 2H), 7.64 (d,  $J$  = 8.7 Hz, 2H), 7.32 – 7.28 (m, 2H), 7.22 – 7.20 (m, 2H), 7.13 (dd,  $J$  = 7.6, 6.8 Hz, 1H) 3.79 (s, 3H), 3.68 (s, 3H).  $^{13}\text{C}$  NMR (100 MHz, DMSO- $d_6$ )  $\delta$  187.3, 148.1, 147.5, 141.1, 129.7, 128.7, 125.9, 124.3, 123.4, 77.8, 41.8, 41.3. HR-MS (ESI)  $m/z$  calcd for  $\text{C}_{16}\text{H}_{16}\text{NO}_4\text{S}_2$   $[\text{M}+\text{H}]^+$  350.0515, found 350.0516.

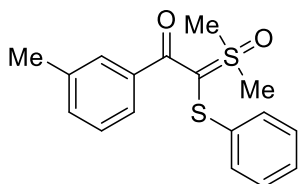

**2-(Dimethyl(oxo)- $\lambda^6$ -sulfaneylidene)-2-(phenylthio)-1-(*m*-tolyl)ethan-1-one** (**3j**):

Compound **3j** (105 mg, 66%) (PE/EA = 1/2) was prepared using the general procedure A and isolated as colorless liquid.  $^1\text{H}$  NMR (400 MHz, DMSO- $d_6$ )  $\delta$  = 7.31 (dd,  $J$  = 8.0, 7.6 Hz, 2H), 7.25 – 7.21 (m, 4H), 7.15 – 7.09 (m, 3H), 3.72 (s, 3H), 3.65 (s, 3H), 2.17 (s, 3H).  $^{13}\text{C}$  NMR (100 MHz, DMSO- $d_6$ )  $\delta$  189.5, 141.9, 140.9, 136.9, 130.7, 129.5, 128.4, 127.8, 125.6, 124.8, 124.3, 76.7, 41.9, 41.6, 21.4. HR-MS (ESI)  $m/z$  calcd for  $\text{C}_{17}\text{H}_{19}\text{O}_2\text{S}_2$   $[\text{M}+\text{H}]^+$  319.0821, found 319.0818.

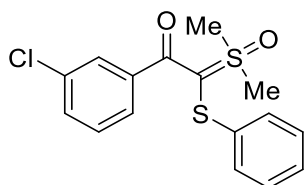

**1-(3-Chlorophenyl)-2-(dimethyl(oxo)- $\lambda^6$ -sulfaneylidene)-2-(phenylthio)ethan-1-one** (**3k**):

Compound **3k** (96 mg, 57%) (PE/EA = 1/2) was prepared using the general procedure A and isolated as yellow liquid.  $^1\text{H}$  NMR (400 MHz, DMSO- $d_6$ )  $\delta$  = 7.45 – 7.36 (m, 3H), 7.33 – 7.28 (m, 3H), 7.23 (d,  $J$  = 7.7 Hz, 2H), 7.13 (dd,  $J$  = 7.6, 7.2 Hz, 1H), 3.75 (s, 3H), 3.67 (s, 3H).  $^{13}\text{C}$  NMR (100 MHz, DMSO- $d_6$ )  $\delta$  187.3, 142.9, 141.4, 132.6, 130.1, 129.8, 129.6, 127.5, 126.2, 125.7, 124.3, 77.3, 41.8, 41.5. HR-MS (ESI)



$m/z$  calcd for  $C_{16}H_{16}ClO_2S_2$   $[M+H]^+$  339.0275, found 339.0271.

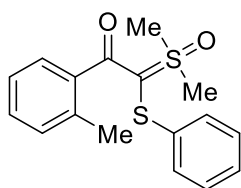

**2-(Dimethyl(oxo)- $\lambda^6$ -sulfaneylidene)-2-(phenylthio)-1-(*o*-tolyl)ethan-1-one (3l):**

Compound **3l** (115 mg, 75%) (PE/EA = 1/2) was prepared using the general procedure A and isolated as yellow liquid.  $^1H$  NMR (400 MHz, DMSO- $d_6$ )  $\delta$  = 7.26 (dd,  $J$  = 7.6, 7.6 Hz, 2H), 7.17 (d,  $J$  = 7.8 Hz, 2H), 7.13 – 7.06 (m, 3H), 6.97 (d,  $J$  = 6.6 Hz, 2H), 3.78 (s, 3H), 3.65 (s, 3H), 2.20 (s, 3H).  $^{13}C$  NMR (100 MHz, DMSO- $d_6$ )  $\delta$  191.5, 142.2, 141.5, 134.2, 130.3, 129.4, 128.3, 125.9, 125.5, 125.1, 124.3, 77.5, 42.0, 41.4, 19.3. HR-MS (ESI)  $m/z$  calcd for  $C_{17}H_{19}O_2S_2$   $[M+H]^+$  319.0821, found 319.0820.

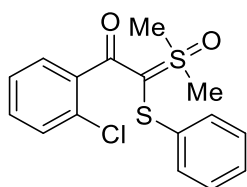

**1-(2-Chlorophenyl)-2-(dimethyl(oxo)- $\lambda^6$ -sulfaneylidene)-2-(phenylthio)ethan-1-**

**one (3m):** Compound **3m** (128 mg, 76%) (PE/EA = 1/2) was prepared using the general procedure A and isolated as yellow solid. m.p. 115–117 °C.  $^1H$  NMR (400 MHz, DMSO- $d_6$ )  $\delta$  = 7.35 (d,  $J$  = 8.0 Hz, 1H), 7.28 – 7.22 (m, 3H), 7.21 – 7.07 (m, 5H), 3.77 (s, 3H), 3.66 (s, 3H).  $^{13}C$  NMR (100 MHz, DMSO- $d_6$ )  $\delta$  187.7, 141.5, 141.0, 130.0, 129.9, 129.5, 129.4, 127.7, 126.9, 125.6, 124.4, 77.5, 41.8, 41.2. HR-MS (ESI)  $m/z$  calcd for  $C_{16}H_{16}ClO_2S_2$   $[M+H]^+$  339.0274, found 339.0279.

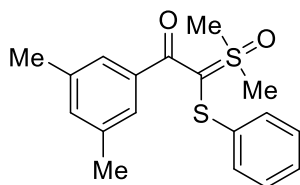

**2-(Dimethyl(oxo)- $\lambda^6$ -sulfaneylidene)-1-(3,5-dimethylphenyl)-2-(phenylthio)ethan-**

**1-one (3n):** Compound **3n** (99 mg, 60%) (PE/EA = 1/2) was prepared using the general procedure A and isolated as yellow liquid.  $^1H$  NMR (400 MHz, DMSO- $d_6$ )  $\delta$  = 7.33 – 7.29 (m, 2H), 7.25 – 7.21 (m, 2H), 7.15 – 7.11 (m, 1H), 7.02 (s, 2H), 6.95 (s, 1H), 3.73 (s, 3H), 3.65 (s, 3H), 2.12 (s, 6H).  $^{13}C$  NMR (100 MHz, DMSO- $d_6$ )  $\delta$  189.8, 142.1,

140.9, 136.8, 131.4, 129.5, 125.61, 125.58, 124.4, 76.7, 41.9, 41.6, 21.3. HR-MS (ESI)  $m/z$  calcd for  $C_{18}H_{21}O_2S_2$   $[M+H]^+$  333.0977, found 333.0975.

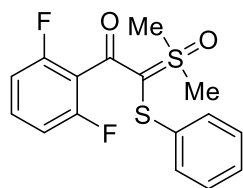

**1-(2,6-Difluorophenyl)-2-(dimethyl(oxo)- $\lambda^6$ -sulfaneylidene)-2-(phenylthio)ethan-**

**1-one (3o):** Compound **3o** (139 mg, 82%) (PE/EA = 1/2) was prepared using the general procedure A and isolated as yellow solid. m.p. 123–125 °C.  $^1H$  NMR (400 MHz, DMSO- $d_6$ )  $\delta$  = 7.34 – 7.16 (m, 5H), 7.14 – 6.99 (m, 2H), 6.94 (d,  $J$  = 9.0 Hz, 1H), 3.77 (s, 3H), 3.70 (s, 3H).  $^{13}C$  NMR (100 MHz, DMSO- $d_6$ )  $\delta$  180.8, 159.2 (d,  $^1J_{C-F}$  = 246.7 Hz), 158.7 (d,  $^1J_{C-F}$  = 246.1 Hz), 140.3, 130.7 (d,  $^2J_{C-F}$  = 39.5 Hz), 129.4, 125.8, 124.5, 119.8 (t,  $^2J_{C-F}$  = 24.1 Hz), 112.0 (d,  $^2J_{C-F}$  = 21.6 Hz), 79.9, 41.7, 41.3.  $^{19}F$  NMR (376 MHz, DMSO- $d_6$ )  $\delta$  -113.7 (s), -114.4 (s). HR-MS (ESI)  $m/z$  calcd for  $C_{16}H_{15}F_2O_2S_2$   $[M+H]^+$  341.0476, found 341.0476.

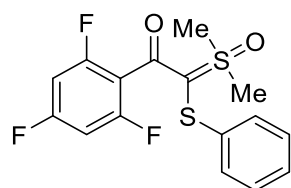

**2-(Dimethyl(oxo)- $\lambda^6$ -sulfaneylidene)-2-(phenylthio)-1-(2,4,6-trifluorophenyl)eth-**

**an-1-one (3p):** Compound **3p** (133 mg, 74%) (PE/EA = 1/2) was prepared using the general procedure A and isolated as yellow liquid.  $^1H$  NMR (400 MHz, DMSO- $d_6$ )  $\delta$  = 7.25 (d,  $J$  = 7.5 Hz, 2H), 7.18 (d,  $J$  = 7.8 Hz, 2H), 7.11 (d,  $J$  = 7.4 Hz, 2H), 7.05 – 7.00 (m, 1H), 3.74 (d,  $J$  = 29.4 Hz, 6H).  $^{13}C$  NMR (100 MHz, DMSO- $d_6$ )  $\delta$  179.8, 162.1 (d,  $^1J_{C-F}$  = 248.7 Hz), 159.2 (d,  $^1J_{C-F}$  = 233.3 Hz), 140.2, 129.4, 125.9, 124.5, 116.6 (d,  $^2J_{C-F}$  = 24.2 Hz) 101.0 (m), 79.8, 41.6, 41.3.  $^{19}F$  NMR (376 MHz, DMSO- $d_6$ )  $\delta$  -108.0 (m), -110.6 (s), -111.6(s). HR-MS (ESI)  $m/z$  calcd for  $C_{16}H_{14}F_3O_2S_2$   $[M+H]^+$  359.0382, found 359.0383.

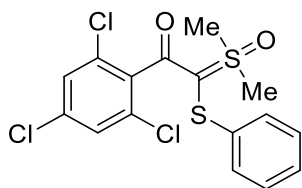

**2-(Dimethyl(oxo)- $\lambda^6$ -sulfaneylidene)-2-(phenylthio)-1-(2,4,6-trichlorophenyl)**

**ethan-1-one (3q):** Compound **3q** (173 mg, 85%) (PE/EA = 1/2) was prepared using the general procedure A and isolated as white solid. m.p. 80–82 °C.  $^1\text{H}$  NMR (400 MHz, DMSO- $d_6$ )  $\delta$  = 7.56 (d,  $J$  = 41.8 Hz, 2H), 7.26 – 7.22 (m, 4H), 7.13 – 7.07 (m, 1H), 3.77 (s, 3H), 3.69 (s, 3H).  $^{13}\text{C}$  NMR (100 MHz, DMSO- $d_6$ )  $\delta$  183.2, 139.9, 139.2, 133.6, 132.8, 132.2, 129.3, 128.5, 128.1, 125.9, 125.2, 78.7, 41.6, 40.9. HR-MS (ESI)  $m/z$  calcd for  $\text{C}_{16}\text{H}_{14}\text{Cl}_3\text{O}_2\text{S}_2$   $[\text{M}+\text{H}]^+$  406.9495, found 406.9498.

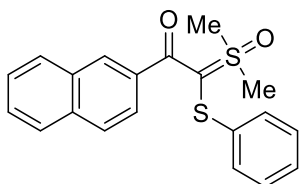

**2-(Dimethyl(oxo)- $\lambda^6$ -sulfaneylidene)-1-(naphthalen-2-yl)-2-(phenylthio)ethan-1-**

**one (3r):** Compound **3r** (110 mg, 62%) (PE/EA = 1/2) was prepared using the general procedure A and isolated as yellow liquid.  $^1\text{H}$  NMR (400 MHz, DMSO- $d_6$ )  $\delta$  = 8.02 (s, 1H), 7.86 (d,  $J$  = 7.9 Hz, 1H), 7.78 (d,  $J$  = 8.5 Hz, 1H), 7.72 (d,  $J$  = 8.1 Hz, 1H), 7.59 (d,  $J$  = 8.3 Hz, 1H), 7.56 – 7.44 (m, 2H), 7.34 – 7.23 (m, 4H), 7.13 (dd,  $J$  = 7.2, 7.2 Hz, 1H), 3.79 (s, 3H), 3.70 (s, 3H).  $^{13}\text{C}$  NMR (100 MHz, DMSO- $d_6$ )  $\delta$  189.2, 141.8, 138.3, 133.9, 132.4, 129.58, 129.59, 128.9, 128.0, 127.4, 127.3, 126.9, 125.7, 125.5, 124.3, 77.1, 42.0, 41.6. HR-MS (ESI)  $m/z$  calcd for  $\text{C}_{20}\text{H}_{19}\text{O}_2\text{S}_2$   $[\text{M}+\text{H}]^+$  355.0821, found 355.0817.

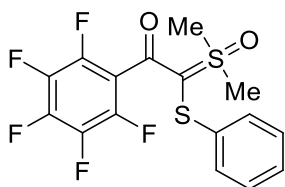

**2-(Dimethyl(oxo)- $\lambda^6$ -sulfaneylidene)-1-(perfluorophenyl)-2-(phenylthio)ethan-1-**

**one (3s):** Compound **3s** (136 mg, 69%) (PE/EA = 1/2) was prepared using the general procedure A and isolated as yellow solid. m.p. 116–118 °C.  $^1\text{H}$  NMR (400 MHz, DMSO- $d_6$ )  $\delta$  = 7.30 – 7.24 (m, 2H), 7.19 (d,  $J$  = 7.5 Hz, 2H), 7.13 (dd,  $J$  = 7.6, 7.2 Hz,

1H), 3.81 (s, 3H), 3.73 (s, 3H). <sup>13</sup>C NMR (100 MHz, DMSO-*d*<sub>6</sub>) δ 176.4, 144.5 (d, <sup>1</sup>J<sub>C-F</sub> = 253.8 Hz), 139.6, 137.1 (d, <sup>1</sup>J<sub>C-F</sub> = 249.4 Hz), 129.5, 126.2, 124.8, 117.1 (t, <sup>2</sup>J<sub>C-F</sub> = 21.8 Hz), 81.4, 41.4, 41.0. <sup>19</sup>F NMR (376 MHz, DMSO-*d*<sub>6</sub>) δ -141.9 (d, *J* = 30.8 Hz), -143.6 (d, *J* = 20.7 Hz), -154.6 (t, *J* = 21.8 Hz), -161.7 (m). HR-MS (ESI) *m/z* calcd for C<sub>16</sub>H<sub>12</sub>F<sub>5</sub>O<sub>2</sub>S<sub>2</sub> [M+H]<sup>+</sup> 395.0193, found 395.0192.

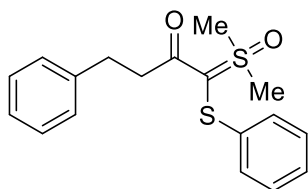

**1-(Dimethyl(oxo)-λ<sup>6</sup>-sulfaneylidene)-4-phenyl-1-(phenylthio)butan-2-one (3t)**

Compound **3t** (121 mg, 73%) (PE/EA = 1/2) was prepared using the general procedure A and isolated as yellow liquid. <sup>1</sup>H NMR (400 MHz, DMSO-*d*<sub>6</sub>) δ = 7.27 (d, *J* = 7.5 Hz, 2H), 7.19 (dd, *J* = 7.4, 2.2 Hz, 4H), 7.15 – 7.06 (m, 4H), 3.63 (s, 3H), 3.56 (s, 3H), 2.86 (ddd, *J* = 14.6, 9.4, 5.9 Hz, 1H), 2.78 – 2.72 (m, 2H), 2.60 – 2.51 (m, 1H). <sup>13</sup>C NMR (100 MHz, DMSO-*D*<sub>6</sub>) δ = 192.7, 142.4, 141.2, 129.6, 128.8, 128.7, 126.2, 125.6, 124.2, 75.1, 42.2, 41.8, 31.3. HR-MS (ESI) *m/z* calcd for C<sub>18</sub>H<sub>20</sub>O<sub>2</sub>S<sub>2</sub> [M<sup>+</sup>H]<sup>+</sup> 333.0977, found 333.0962.

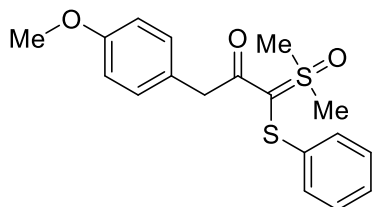

**1-(Dimethyl(oxo)-λ<sup>6</sup>-sulfaneylidene)-3-(4-methoxyphenyl)-1-(phenylthio)propan-2-one (3u)**

Compound **3u** (145 mg, 83%) (PE/EA = 1/2) was prepared using the general procedure A and isolated as yellow liquid. <sup>1</sup>H NMR (400 MHz, DMSO-*d*<sub>6</sub>) δ = 7.33 – 7.29 (m, 2H), 7.24 – 7.21 (m, 2H), 7.17 – 7.12 (m, 1H), 7.02 (d, *J* = 8.7 Hz, 2H), 6.77 – 6.73 (m, 2H), 3.68 (s, 3H), 3.61 (s, 3H), 3.55 (s, 3H), 3.38 (s, 2H). <sup>13</sup>C NMR (100 MHz, DMSO-*d*<sub>6</sub>) δ 191.7, 158.1, 141.2, 130.8, 129.6, 129.2, 125.7, 124.2, 113.9, 75.4, 55.5, 43.1, 42.1, 41.7. HR-MS (ESI) *m/z* calcd for C<sub>18</sub>H<sub>21</sub>O<sub>3</sub>S<sub>2</sub> [M+H]<sup>+</sup> 349.0927, found 349.0930.

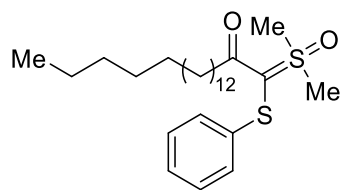

**1-(Dimethyl(oxo)- $\lambda^6$ -sulfaneylidene)-1-(phenylthio)nonadecan-2-one (3v):**

Compound **3v** (119 mg, 50%) (PE/EA = 1/2) was prepared using the general procedure A and isolated as yellow solid. m.p. 75–77 °C.  $^1\text{H}$  NMR (400 MHz,  $\text{CDCl}_3$ )  $\delta$  = 7.29 – 7.25 (m, 2H), 7.22 (d,  $J$  = 7.4 Hz, 2H), 7.12 (dd, 1H), 3.53 (s, 3H), 3.48 (s, 3H), 2.75 – 2.40 (m, 2H), 1.60 – 1.52 (m, 2H), 1.25 – 1.21 (m, 28H), 0.87 (t,  $J$  = 6.7 Hz, 3H).  $^{13}\text{C}$  NMR (100 MHz,  $\text{CDCl}_3$ )  $\delta$  196.7, 140.7, 129.2, 125.5, 124.3, 74.8, 43.2, 42.9, 41.1, 37.8, 32.0, 29.80, 29.76, 29.60, 29.57, 29.5, 25.5, 22.8, 14.2. HR-MS (ESI)  $m/z$  calcd for  $\text{C}_{27}\text{H}_{47}\text{O}_2\text{S}_2$   $[\text{M}+\text{H}]^+$  467.3012, found 467.3003.

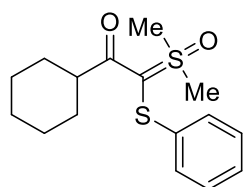

**1-Cyclohexyl-2-(dimethyl(oxo)- $\lambda^6$ -sulfaneylidene)-2-(phenylthio)ethan-1-one (3w):**

Compound **3w** (78 mg, 50%) (PE/EA = 1/2) was prepared using the general procedure A and isolated as a yellow liquid.  $^1\text{H}$  NMR (400 MHz,  $\text{DMSO}-d_6$ )  $\delta$  = 7.33 – 7.28 (m, 2H), 7.24 – 7.20 (m, 2H), 7.15 – 7.10 (m, 1H), 3.59 (s, 3H), 3.52 (s, 3H), 2.90 (tt,  $J$  = 11.2, 3.6 Hz, 1H), 1.70 – 1.52 (m, 4H), 1.37 – 0.97 (m, 6H).  $^{13}\text{C}$  NMR (100 MHz,  $\text{DMSO}-d_6$ )  $\delta$  197.1, 141.8, 129.6, 125.6, 124.2, 74.2, 44.3, 42.2, 41.8, 30.1, 29.2, 26.1, 26.1, 25.9. HR-MS (ESI)  $m/z$  calcd for  $\text{C}_{16}\text{H}_{23}\text{O}_2\text{S}_2$   $[\text{M}+\text{H}]^+$  311.1134, found 311.1132.

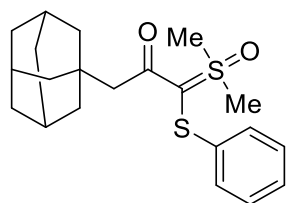

**3-(Adamantan-1-yl)-1-(dimethyl(oxo)- $\lambda^6$ -sulfaneylidene)-1-(phenylthio)propan-2-one (3x):**

Compound **3x** (150 mg, 80%) (PE/EA = 1/2) was prepared using the general procedure A and isolated as a yellow liquid.  $^1\text{H}$  NMR (400 MHz,  $\text{DMSO}-d_6$ )  $\delta$  = 7.33 – 7.28 (m, 2H), 7.22 – 7.18 (m, 2H), 7.15 – 7.10 (m, 1H), 3.61 (s, 3H), 3.53 (s, 3H),

2.57 (d,  $J = 12.9$  Hz, 1H), 1.88 – 1.81 (m, 4H), 1.66 – 1.59 (m, 6H), 1.58 – 1.49 (m, 6H).  $^{13}\text{C}$  NMR (100 MHz, DMSO- $d_6$ )  $\delta$  193.0, 141.7, 129.5, 125.6, 124.3, 77.2, 49.8, 42.9, 42.5, 42.1, 33.9, 28.7. HR-MS (ESI)  $m/z$  calcd for  $\text{C}_{21}\text{H}_{29}\text{O}_2\text{S}_2$   $[\text{M}+\text{H}]^+$  377.1603, found 377.1606.

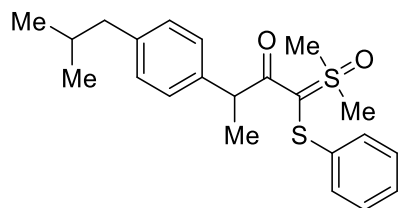

**1-(Dimethyl(oxo)- $\lambda^6$ -sulfaneylidene)-3-(4-isobutylphenyl)-1-(phenylthio)butan-2-one (3y):** Compound **3y** (157 mg, 81%) (PE/EA = 1/2) was prepared using the general procedure A and isolated as white solid. m.p. 97–99 °C.  $^1\text{H}$  NMR (400 MHz, DMSO- $d_6$ )  $\delta = 7.38 - 7.33$  (m, 1H), 7.30 – 7.26 (m, 1H), 7.18 (dd,  $J = 7.2, 7.6$  Hz, 2H), 7.09 (dd,  $J = 7.6, 7.6$  Hz, 1H), 7.04 (d,  $J = 8.0$  Hz, 1H), 6.98 – 6.91 (m, 2H), 6.81 (d,  $J = 7.9$  Hz, 1H), 4.39 (q,  $J = 7.1$  Hz, 1H), 3.59 (d,  $J = 3.6$  Hz, 3H), 3.53 (s, 3H), 2.34 (dd,  $J = 7.2$  Hz, 7.2 Hz, 2H), 1.83 – 1.68 (m, 1H), 1.23 (d,  $J = 7.2$  Hz, 3H), 0.85 (d,  $J = 6.5$  Hz, 3H), 0.81 (d,  $J = 6.6$  Hz, 3H).  $^{13}\text{C}$  NMR (100 MHz, DMSO- $d_6$ )  $\delta$  194.6, 141.3, 140.4, 139.2, 129.5, 128.9, 127.9, 125.5, 124.2, 75.3, 44.8, 44.6, 42.1, 41.8, 30.1, 22.8, 20.0. HR-MS (ESI)  $m/z$  calcd for  $\text{C}_{22}\text{H}_{29}\text{O}_2\text{S}_2$   $[\text{M}+\text{H}]^+$  389.1603, found 389.1607.

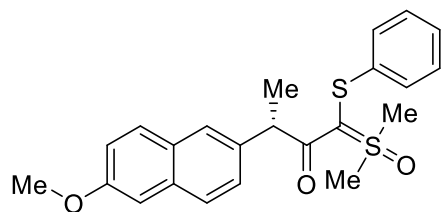

**(S)-1-(Dimethyl(oxo)- $\lambda^6$ -sulfaneylidene)-3-(6-methoxynaphthalen-2-yl)-1-(phenylthio)butan-2-one (3z):** Compound **3z** (170 mg, 83%) (PE/EA = 1/2) was prepared using the general procedure A and isolated as white solid. m.p. 110–112 °C.  $^1\text{H}$  NMR (400 MHz, DMSO- $d_6$ )  $\delta$  7.77 (d,  $J = 8.9$  Hz, 0.5H), 7.73 – 7.67 (m, 1H), 7.51 (d,  $J = 8.6$  Hz, 0.5H), 7.46 – 7.42 (m, 1H), 7.40 – 7.30 (m, 3H), 7.25 (d,  $J = 2.6$  Hz, 0.5H), 7.21 – 7.10 (m, 2H), 7.06 – 6.91 (m, 2.7H), 4.68 – 4.46 (m, 1H), 3.84 (d,  $J = 9.2$  Hz, 3H), 3.61 (s, 3H), 3.54 (d,  $J = 8.0$  Hz, 3H), 1.33 (dd,  $J = 41.8, 7.0$  Hz, 3H).  $^{13}\text{C}$  NMR (100 MHz, DMSO- $D_6$ )  $\delta$  194.5, 157.4, 141.3, 138.8, 133.5, 129.7, 129.2, 128.9, 127.4,

127.0, 126.3, 125.5, 124.3, 118.8, 106.1, 75.4, 55.6, 44.9, 42.0, 19.8. HR-MS (ESI)  $m/z$  calcd for  $C_{23}H_{25}O_3S_2$   $[M+H]^+$  413.1240, found 413.1242.

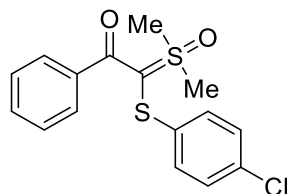

**2-((4-Chlorophenyl)thio)-2-(dimethyl(oxo)- $\lambda^6$ -sulfaneylidene)-1-phenylethan-1-one (3z-1):**

Compound **3z-1** (150 mg, 89%) (PE/EA = 1/2) was prepared using the general procedure A and isolated as a yellow liquid.  $^1H$  NMR (400 MHz, DMSO- $d_6$ )  $\delta$  = 7.47 – 7.43 (m, 2H), 7.39 – 7.28 (m, 3H), 7.29 – 7.23 (m, 4H), 3.75 (s, 3H), 3.66 (s, 3H).  $^{13}C$  NMR (100 MHz, DMSO- $d_6$ )  $\delta$  189.2, 141.1, 140.8, 130.2, 130.1, 129.5, 128.0, 127.6, 126.0, 76.5, 42.0, 41.6. HR-MS (ESI)  $m/z$  calcd for  $C_{16}H_{16}ClO_2S_2$   $[M+H]^+$  339.0275, found 339.0276.

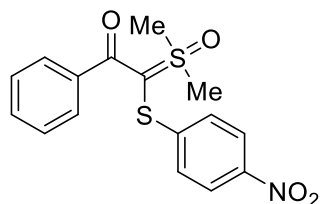

**2-(Dimethyl(oxo)- $\lambda^6$ -sulfaneylidene)-2-((4-nitrophenyl)thio)-1-phenylethan-1-one (3z-2):**

Compound **3z-2** (122 mg, 70%) (PE/EA = 1/2) was prepared using the general procedure A and isolated as a yellow liquid.  $^1H$  NMR (400 MHz, DMSO- $d_6$ )  $\delta$  = 8.16 – 8.12 (m, 2H), 7.50 (d,  $J$  = 8.9 Hz, 2H), 7.46 – 7.42 (m, 2H), 7.39 – 7.28 (m, 1H), 7.29 – 7.24 (m, 2H), 3.81 (s, 3H), 3.69 (s, 3H).  $^{13}C$  NMR (100 MHz, DMSO- $d_6$ )  $\delta$  189.1, 152.2, 145.4, 140.6, 130.3, 128.1, 127.5, 124.8, 124.7, 75.0, 42.1, 41.6. HR-MS (ESI)  $m/z$  calcd for  $C_{16}H_{16}NO_4S_2$   $[M+H]^+$  350.0515, found 350.0518.

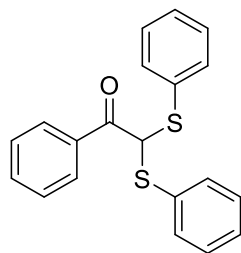

**1-Phenyl-2,2-bis(phenylthio)ethan-1-one (4a):** Compound **4a** (122 mg, 73%) (PE/EA = 15/1) was prepared using the general procedure B and isolated as a yellow solid.  $^1H$

NMR (400 MHz, DMSO-*d*<sub>6</sub>)  $\delta$  = 8.05 (d, *J* = 7.1 Hz, 2H), 7.68 (dd, *J* = 7.2, 8.0 Hz, 1H), 7.53 (dd, *J* = 7.6, 8.0 Hz, 2H), 7.43 – 7.36 (m, 4H), 7.36 – 7.35 (m, 6H), 6.67 (s, 1H). <sup>13</sup>C NMR (100 MHz, DMSO-*d*<sub>6</sub>)  $\delta$  191.3, 134.3, 133.8, 133.1, 131.5, 129.1, 129.0, 128.8, 128.4, 59.8. Analytical data for compound **4a** is consistent with literature report.<sup>[4]</sup>

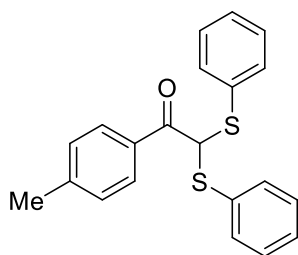

**2,2-Bis(phenylthio)-1-(p-tolyl)ethan-1-one (4b):** Compound **4b** (96 mg, 55%) (PE/EA = 15/1) was prepared using the general procedure B and isolated as yellow liquid. <sup>1</sup>H NMR (400 MHz, DMSO-*d*<sub>6</sub>)  $\delta$  = 7.97 (d, *J* = 8.2 Hz, 2H), 7.42 (dd, *J* = 6.6, 3.0 Hz, 4H), 7.36 – 7.31 (m, 8H), 6.62 (s, 1H), 2.38 (s, 3H). <sup>13</sup>C NMR (100 MHz, DMSO-*d*<sub>6</sub>)  $\delta$  191.4, 144.9, 133.6, 132.2, 132.1, 129.9, 129.7, 129.5, 128.9, 60.3, 21.8. Analytical data for compound **4b** is consistent with literature report.<sup>[4]</sup>

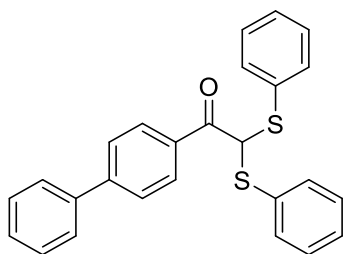

**1-([1,1'-Biphenyl]-4-yl)-2,2-bis(phenylthio)ethan-1-one (4c):** Compound **4c** (99 mg, 48%) (PE/EA = 15/1) was prepared using the general procedure B and isolated as yellow liquid. <sup>1</sup>H NMR (400 MHz, DMSO-*d*<sub>6</sub>)  $\delta$  = 8.16 (s, 2H), 7.84 – 7.75 (m, 4H), 7.51 (dd, *J* = 6.4, 6.8 Hz, 2H), 7.47 – 7.43 (m, 5H), 7.37 – 7.34 (m, 6H), 6.71 (s, 1H). <sup>13</sup>C NMR (100 MHz, DMSO-*d*<sub>6</sub>)  $\delta$  191.3, 145.6, 139.3, 133.7, 132.1, 130.3, 129.6, 129.6, 129.2, 129.1, 128.9, 127.6, 127.4, 60.4. Analytical data for compound **4c** is consistent with literature report.<sup>[4]</sup>



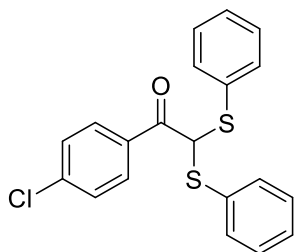

**1-(4-Chlorophenyl)-2,2-bis(phenylthio)ethan-1-one (4d):** Compound **4d** (107 mg, 58%) (PE/EA = 15/1) was prepared using the general procedure B and isolated as yellow solid.  $^1\text{H}$  NMR (400 MHz,  $\text{DMSO-}d_6$ )  $\delta$  = 8.08 (d,  $J$  = 8.6 Hz, 2H), 7.60 (d,  $J$  = 8.6 Hz, 2H), 7.43 – 7.39 (m, 4H), 7.39 – 7.33 (m, 6H), 6.69 (s, 1H).  $^{13}\text{C}$  NMR (100 MHz,  $\text{DMSO-}d_6$ )  $\delta$  190.8, 139.3, 133.7, 133.5, 131.8, 131.5, 129.6, 129.4, 129.0, 60.5. Analytical data for compound **4d** is consistent with literature report.<sup>[4]</sup>

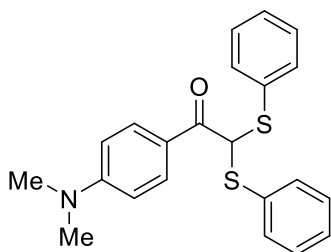

**1-(4-(Dimethylamino)phenyl)-2,2-bis(phenylthio)ethan-1-one (4e):** Compound **4e** (68 mg, 36%) (PE/EA = 15/1) was prepared using the general procedure B and isolated as yellow solid. m.p. 103–105 °C.  $^1\text{H}$  NMR (400 MHz,  $\text{DMSO-}d_6$ )  $\delta$  = 7.91 (d,  $J$  = 9.1 Hz, 2H), 7.47 – 7.38 (m, 4H), 7.35 – 7.31 (m, 6H), 6.70 (d,  $J$  = 9.1 Hz, 2H), 6.43 (s, 1H), 3.02 (s, 6H).  $^{13}\text{C}$  NMR (100 MHz,  $\text{DMSO-}d_6$ )  $\delta$  189.3, 154.1, 133.2, 132.9, 131.8, 129.5, 128.6, 121.4, 111.2, 60.0, 40.1. HR-MS (ESI)  $m/z$  calcd for  $\text{C}_{22}\text{H}_{22}\text{NOS}_2$   $[\text{M}+\text{H}]^+$  380.1137, found 380.1134.

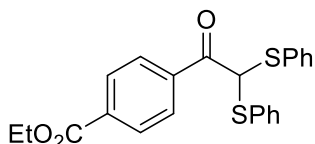

**Ethyl 4-(2,2-bis(phenylthio)acetyl)benzoate (4f):** Compound **4f** (43 mg, 21%) (PE/EA = 15/1) was prepared using the general procedure B and isolated as a yellow liquid.  $^1\text{H}$  NMR (400 MHz,  $\text{DMSO-}d_6$ )  $\delta$  = 8.16 (d,  $J$  = 8.1 Hz, 2H), 8.07 (d,  $J$  = 5.7 Hz, 2H), 7.42–7.36 (m, 10H), 6.74 – 6.72 (m, 1H), 4.36 (q,  $J$  = 7.0 Hz, 2H), 1.34 (t,  $J$  = 7.0 Hz, 3H).  $^{13}\text{C}$  NMR (100 MHz,  $\text{DMSO-}D_6$ )  $\delta$  191.6, 165.6, 138.5, 134.6, 133.9,

131.8, 130.4, 130.0, 129.8, 129.2, 61.9, 61.0, 14.8. HR-MS (ESI)  $m/z$  calcd for  $C_{23}H_{21}O_3S_2$   $[M+H]^+$  409.0927, found 409.0921.

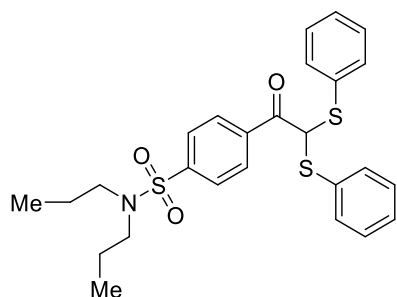

**4-(2,2-Bis(phenylthio)acetyl)-*N,N*-dipropylbenzenesulfonamide (4g):** Compound **4g** (157 mg, 63%) (PE/EA = 15/1) was prepared using the general procedure B and isolated as yellow liquid.  $^1H$  NMR (400 MHz, DMSO- $d_6$ )  $\delta$  = 8.21 (d,  $J$  = 8.6 Hz, 2H), 7.92 (d,  $J$  = 8.3 Hz, 2H), 7.43 – 7.39 (m, 4H), 7.39 – 7.36 (m, 6H), 6.77 (s, 1H), 3.11 – 3.05 (m, 4H), 1.52 – 1.44 (m, 4H), 0.81 (t,  $J$  = 7.3 Hz, 6H).  $^{13}C$  NMR (100 MHz, DMSO- $d_6$ )  $\delta$  191.1, 144.2, 137.9, 133.8, 131.6, 130.5, 129.6, 129.1, 127.5, 60.9, 50.1, 22.1, 11.5. HR-MS (ESI)  $m/z$  calcd for  $C_{26}H_{29}NNaO_3S_3$   $[M+Na]^+$  522.1207, found 522.1200.

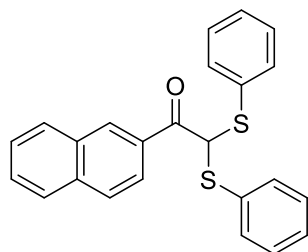

**1-(Naphthalen-2-yl)-2,2-bis(phenylthio)ethan-1-one (4h):** Compound **4h** (85 mg, 44%) (PE/EA = 15/1) was prepared using the general procedure B and isolated as yellow liquid.  $^1H$  NMR (400 MHz, DMSO- $d_6$ )  $\delta$  = 8.79 (s, 1H), 8.06 – 7.98 (m, 4H), 7.71 – 7.61 (m, 2H), 7.47 – 7.45 (m, 4H), 7.38 – 7.33 (m, 6H), 6.82 (s, 1H).  $^{13}C$  NMR (100 MHz, DMSO- $d_6$ )  $\delta$  191.8, 135.7, 133.8, 132.6, 132.1, 132.0, 131.6, 130.2, 129.6, 129.0, 128.2, 127.6, 124.9, 60.7. Analytical data for compound **4h** is consistent with literature report.<sup>[4]</sup>

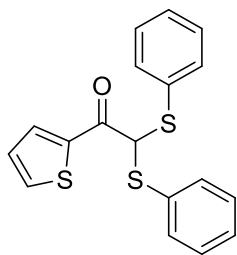

**2,2-Bis(phenylthio)-1-(thiophen-2-yl)ethan-1-one (4i):** Compound **4i** (110 mg, 64%) (PE/EA = 15/1) was prepared using the general procedure B and isolated as yellow liquid.  $^1\text{H}$  NMR (400 MHz,  $\text{DMSO-}d_6$ )  $\delta$  = 8.18 – 8.16 (m, 1H), 8.08 (dd,  $J$  = 5.0, 1.3 Hz, 1H), 7.47 – 7.43 (m, 4H), 7.38 – 7.34 (m, 6H), 7.26 – 7.23 (m, 1H), 6.45 (s, 1H).  $^{13}\text{C}$  NMR (100 MHz,  $\text{DMSO-}d_6$ )  $\delta$  = 185.3, 141.3, 137.1, 135.5, 133.5, 132.2, 129.6, 129.4, 129.0, 60.1. Analytical data for compound **4i** is consistent with literature report.<sup>[4]</sup>

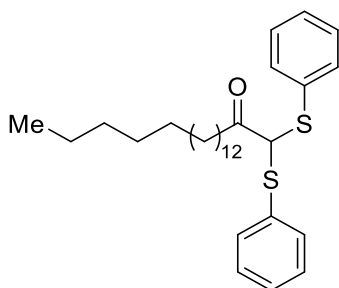

**1,1-Bis(phenylthio)nonadecan-2-one (4j):** Compound **4j** (112 mg, 45%) (PE/EA = 15/1) was prepared using the general procedure B and isolated as yellow solid. m.p. 65–67 °C.  $^1\text{H}$  NMR (400 MHz,  $\text{CDCl}_3$ )  $\delta$  = 7.45 (dd,  $J$  = 6.7, 3.0 Hz, 4H), 7.34 – 7.30 (m, 6H), 4.90 (s, 1H), 2.67 (t,  $J$  = 7.3 Hz, 2H), 1.59 – 1.52 (m, 2H), 1.26 (d,  $J$  = 6.3 Hz, 28H), 0.89 (t,  $J$  = 6.7 Hz, 3H).  $^{13}\text{C}$  NMR (100 MHz,  $\text{CDCl}_3$ )  $\delta$  202.4, 133.1, 132.8, 129.3, 128.6, 64.8, 38.8, 32.1, 29.82, 29.79, 29.7, 29.6, 29.50, 29.45, 29.2, 24.1, 22.8, 14.3. HR-MS (ESI)  $m/z$  calcd for  $\text{C}_{31}\text{H}_{46}\text{NaOS}_2$   $[\text{M}+\text{Na}]^+$  521.2882, found 521.2875.

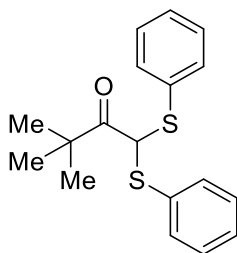

**3,3-Dimethyl-1,1-bis(phenylthio)butan-2-one (4k):** Compound **4k** (82 mg, 52%)

(PE/EA = 15/1) was prepared using the general procedure B and isolated as yellow solid. m.p. 65–67 °C. as a yellow solid.  $^1\text{H}$  NMR (400 MHz,  $\text{DMSO-}d_6$ )  $\delta$  7.52 – 7.42 (m, 4H), 7.39 – 7.35 (m, 6H), 5.78 (s, 1H), 1.09 (s, 9H).  $^{13}\text{C}$  NMR (100 MHz,  $\text{DMSO-}d_6$ )  $\delta$  206.1, 134.0, 132.2, 129.6, 129.1, 58.4, 44.5, 26.8. HR-MS (ESI)  $m/z$  calcd for  $\text{C}_{18}\text{H}_{20}\text{NaOS}_2$   $[\text{M}+\text{Na}]^+$  339.0848, found 339.0850.

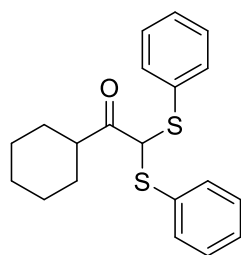

**1-Cyclohexyl-2,2-bis(phenylthio)ethan-1-one (4l):** Compound **4l** (102 mg, 60%) (PE/EA = 15/1) was prepared using the general procedure B and isolated as white solid. m.p. 65–67 °C.  $^1\text{H}$  NMR (400 MHz,  $\text{DMSO-}d_6$ )  $\delta$  = 7.46 – 7.42 (m, 4H), 7.39 – 7.33 (m, 6H), 5.84 (s, 1H), 2.86 (tt,  $J$  = 11.2, 3.5 Hz, 1H), 1.79 – 1.65 (m, 4H), 1.27 – 1.06 (m, 6H).  $^{13}\text{C}$  NMR (100 MHz,  $\text{DMSO-}d_6$ )  $\delta$  204.1, 133.0, 132.3, 129.5, 128.7, 61.7, 47.6, 29.0, 25.7, 25.5. HR-MS (ESI)  $m/z$  calcd for  $\text{C}_{20}\text{H}_{22}\text{NaOS}_2$   $[\text{M}+\text{Na}]^+$  365.1004, found 365.1007.

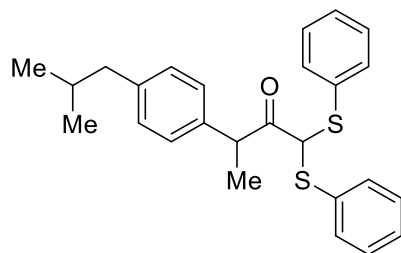

**3-(4-Isobutylphenyl)-1,1-bis(phenylthio)butan-2-one (4m):** Compound **4m** (105 mg, 50%) (PE/EA = 15/1) was prepared using the general procedure B and isolated as yellow liquid.  $^1\text{H}$  NMR (400 MHz,  $\text{DMSO-}d_6$ )  $\delta$  = 7.40 – 7.36 (m, 4H), 7.25 – 7.17 (m, 3H), 7.12 – 7.05 (m, 7H), 5.47 (s, 1H), 4.30 (q,  $J$  = 6.9 Hz, 1H), 2.40 (d,  $J$  = 7.0 Hz, 2H), 1.85 – 1.75 (m, 1H), 1.30 (d,  $J$  = 6.9 Hz, 3H), 0.84 (d,  $J$  = 6.7 Hz, 6H).  $^{13}\text{C}$  NMR (100 MHz,  $\text{DMSO-}d_6$ )  $\delta$  201.3, 140.7, 137.3, 134.1, 132.7, 132.5, 131.6, 129.8, 129.7, 129.5, 129.4, 128.5, 128.3, 62.7, 49.2, 44.8, 30.2, 22.7, 18.9. HR-MS (ESI)  $m/z$  calcd for  $\text{C}_{26}\text{H}_{28}\text{NaOS}_2$   $[\text{M}+\text{Na}]^+$  443.1474, found 443.1477.

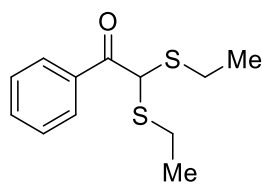

**2,2-Bis(ethylthio)-1-phenylethan-1-one (4n):** Compound **4n** (108 mg, 90%) (PE/EA = 15/1) was prepared using the general procedure B and isolated as yellow liquid.  $^1\text{H}$  NMR (400 MHz,  $\text{CDCl}_3$ )  $\delta$  = 8.04 – 8.00 (m, 2H), 7.60 – 7.55 (m, 1H), 7.47 (dd,  $J$  = 8.0, 7.6 Hz, 2H), 5.36 (s, 1H), 2.76 (q,  $J$  = 7.4 Hz, 2H), 2.62 (q,  $J$  = 7.5 Hz, 2H), 1.25 (t,  $J$  = 7.5 Hz, 6H).  $^{13}\text{C}$  NMR (100 MHz,  $\text{CDCl}_3$ )  $\delta$  191.9, 134.5, 133.5, 129.0, 128.7, 54.4, 24.3, 14.2. HR-MS (ESI)  $m/z$  calcd for  $\text{C}_{12}\text{H}_{16}\text{NaOS}_2$   $[\text{M}+\text{Na}]^+$  263.0535, found 263.0536.

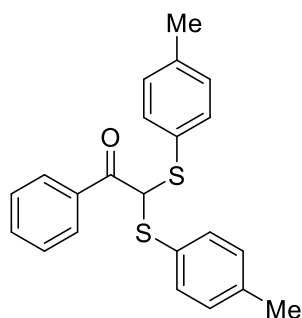

**1-Phenyl-2,2-bis(*p*-tolylthio)ethan-1-one (4o):** Compound **4o** (91 mg, 50%) (PE/EA = 15/1) was prepared using the general procedure B and isolated as yellow liquid.  $^1\text{H}$  NMR (400 MHz,  $\text{CDCl}_3$ )  $\delta$  = 7.95 (d,  $J$  = 7.7 Hz, 2H), 7.60 – 7.55 (m, 1H), 7.47 – 7.43 (m, 2H), 7.37 (d,  $J$  = 7.8 Hz, 4H), 7.13 (d,  $J$  = 7.9 Hz, 4H), 5.66 (s, 1H), 2.35 (s, 6H).  $^{13}\text{C}$  NMR (100 MHz,  $\text{CDCl}_3$ )  $\delta$  191.5, 139.3, 134.7, 134.6, 133.6, 130.0, 129.2, 128.7, 128.7, 63.5, 21.4. Analytical data for compound **4o** is consistent with literature report.<sup>[4]</sup>

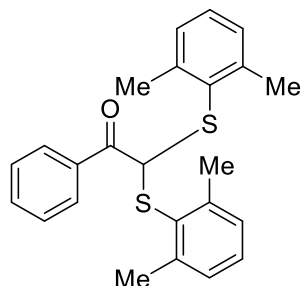

**2,2-Bis((2,6-dimethylphenyl)thio)-1-phenylethan-1-one (4p):** Compound **4p** (137 mg, 70%) (PE/EA = 15/1) was prepared using the general procedure B and isolated as yellow solid. m.p. 108–110 °C.  $^1\text{H}$  NMR (400 MHz,  $\text{DMSO}-d_6$ )  $\delta$  = 7.66 – 7.62 (m,

2H), 7.61 – 7.57 (m, 1H), 7.36 (dd,  $J = 7.6, 8.0$  Hz, 2H), 7.17 (dd,  $J = 8.3, 6.8$  Hz, 2H), 7.08 (d,  $J = 7.6$  Hz, 4H), 5.03 (s, 1H), 2.22 (s, 12H).  $^{13}\text{C}$  NMR (100 MHz, DMSO- $d_6$ )  $\delta$  193.7, 143.6, 134.5, 134.4, 131.4, 130.2, 129.2, 129.0, 128.9, 60.9, 21.8. HR-MS (ESI)  $m/z$  calcd for  $\text{C}_{24}\text{H}_{24}\text{NaOS}_2$   $[\text{M}+\text{Na}]^+$  415.1161, found 415.1142.

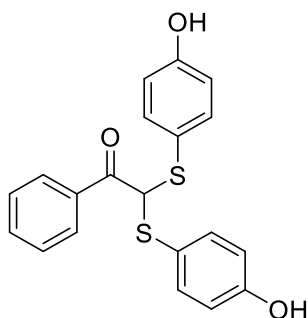

**2,2-Bis((4-hydroxyphenyl)thio)-1-phenylethan-1-one (4q):** Compound **4q** (81 mg, 44%) (PE/EA = 15/1) was prepared using the general procedure B and isolated as yellow liquid.  $^1\text{H}$  NMR (400 MHz, DMSO- $d_6$ )  $\delta$  = 9.79 (s, 2H), 7.99 – 7.94 (m, 2H), 7.75 (dd,  $J = 7.6, 7.2$  Hz, 1H), 7.56 (dd,  $J = 7.6, 7.6$  Hz, 2H), 7.25 – 7.20 (m, 4H), 6.76 – 6.70 (m, 4H), 6.10 (s, 1H).  $^{13}\text{C}$  NMR (100 MHz, DMSO- $d_6$ )  $\delta$  192.2, 159.0, 137.0, 135.1, 134.1, 129.4, 129.2, 120.2, 116.6, 63.4. Analytical data for compound **4q** is consistent with literature report.<sup>[4]</sup>

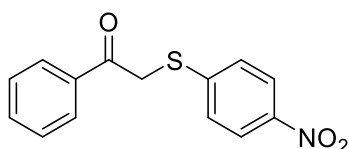

**2-((4-Nitrophenyl)thio)-1-phenylethan-1-one (5a):** Compound **5a** (20 mg, 14%) (PE/EA = 15/1) was prepared using the general procedure B and isolated as yellow liquid.  $^1\text{H}$  NMR (400 MHz, DMSO- $d_6$ )  $\delta$  = 8.13 – 8.07 (m, 4H), 7.71 – 7.66 (m, 1H), 7.59 – 7.52 (m, 4H), 4.98 (s, 2H).  $^{13}\text{C}$  NMR (100 MHz, DMSO- $d_6$ )  $\delta$  194.1, 147.2, 145.1, 135.8, 134.4, 129.4, 129.2, 127.1, 124.3, 39.8. Analytical data for compound **5a** is consistent with literature report.<sup>[3]</sup>

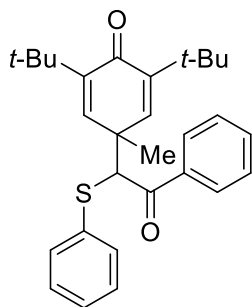

**2,6-Di-tert-butyl-4-methyl-4-(2-oxo-2-phenyl-1-(phenylthio)ethyl)cyclohexa-2,5-dien-1-one (5b):** Compound **5b** (49 mg, 22%) (PE/EA = 15/1) was prepared using the general procedure B and isolated as yellow liquid.  $^1\text{H}$  NMR (400 MHz, DMSO- $d_6$ )  $\delta$  = 8.01 – 7.92 (m, 2H), 7.62 (dd,  $J$  = 7.6, 7.2 Hz, 1H), 7.47 (dd,  $J$  = 8.0, 7.6 Hz, 2H), 7.40 – 7.36 (m, 2H), 7.30 – 7.21 (m, 3H), 7.02 (d,  $J$  = 2.7 Hz, 1H), 6.89 (d,  $J$  = 2.9 Hz, 1H), 5.46 (s, 1H), 1.35 (s, 3H), 1.14 (s, 9H), 1.03 (s, 9H).  $^{13}\text{C}$  NMR (100 MHz, DMSO- $d_6$ )  $\delta$  196.6, 186.0, 144.9, 143.9, 137.0, 135.2, 134.2, 131.1, 129.7, 129.3, 129.0, 127.8, 58.5, 43.5, 35.0, 29.60, 29.55, 24.0. HR-MS (ESI)  $m/z$  calcd for  $\text{C}_{29}\text{H}_{34}\text{NaO}_2\text{S}$  [ $\text{M}+\text{Na}$ ] $^+$  469.2172, found 469.2167.

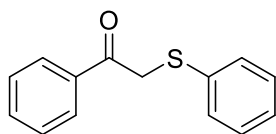

**1-Phenyl-2-(phenylthio)ethan-1-one (5c):**  $^1\text{H}$  NMR (400 MHz,  $\text{CDCl}_3$ )  $\delta$  = 7.94 (d,  $J$  = 8.0 Hz, 2H), 7.60 – 7.56 (m, 1H), 7.48 – 7.43 (m, 2H), 7.41 – 7.37 (m, 2H), 7.28 (dd,  $J$  = 7.6 Hz, 2H), 7.25 – 7.21 (m, 1H), 4.28 (s, 2H).  $^{13}\text{C}$  NMR (100 MHz,  $\text{CDCl}_3$ )  $\delta$  194.2, 135.5, 134.9, 133.6, 130.6, 129.2, 128.82, 128.80, 127.2, 41.3. Analytical data for compound **5c** is consistent with literature report.<sup>[3]</sup>

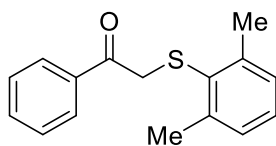

**2-((2,6-Dimethylphenyl)thio)-1-phenylethan-1-one (5d):**  $^1\text{H}$  NMR (400 MHz,  $\text{CDCl}_3$ )  $\delta$  = 7.88 (d,  $J$  = 7.7 Hz, 2H), 7.56 (dd,  $J$  = 7.6, 7.2 Hz, 1H), 7.43 (dd,  $J$  = 7.6, 7.6 Hz, 2H), 7.15 (dd,  $J$  = 8.7, 6.1 Hz, 1H), 7.09 (d,  $J$  = 8.1 Hz, 2H), 3.98 (s, 2H), 2.46 (s, 6H).  $^{13}\text{C}$  NMR (100 MHz,  $\text{CDCl}_3$ )  $\delta$  194.6, 143.5, 135.6, 133.4, 132.1, 129.1, 128.8, 128.7, 128.5, 40.9, 22.0. HR-MS (ESI)  $m/z$  calcd for  $\text{C}_{16}\text{H}_{17}\text{OS}$  [ $\text{M}+\text{H}$ ] $^+$  257.0995,

found 257.0998.

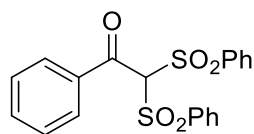

**1-Phenyl-2,2-bis(phenylsulfonyl)ethan-1-one (6):**  $^1\text{H}$  NMR (400 MHz,  $\text{CDCl}_3$ )  $\delta$  = 7.94 (d,  $J$  = 8.4 Hz, 4H), 7.78 (d,  $J$  = 8.2 Hz, 2H), 7.67 (dd,  $J$  = 7.5 Hz, 2H), 7.58 (dd,  $J$  = 11.5, 4.2 Hz, 1H), 7.52 (dd,  $J$  = 8.0, 7.6 Hz, 4H), 7.42 (dd,  $J$  = 7.6, 7.6 Hz, 2H), 6.54 (s, 1H).  $^{13}\text{C}$  NMR (100 MHz,  $\text{CDCl}_3$ )  $\delta$  184.9, 137.4, 136.3, 135.2, 134.9, 130.5, 129.14, 129.13, 129.10, 86.2. Analytical data for compound **6** is consistent with literature report.<sup>[5]</sup>

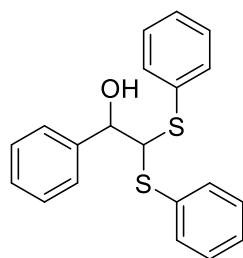

**1-Phenyl-2,2-bis(phenylthio)ethan-1-ol (7):**  $^1\text{H}$  NMR (400 MHz,  $\text{CDCl}_3$ )  $\delta$  = 7.43 – 7.26 (m, 15H), 4.93 (d,  $J$  = 4.7 Hz, 1H), 4.62 (d,  $J$  = 4.9 Hz, 1H), 3.32 (s, 1H).  $^{13}\text{C}$  NMR (100 MHz,  $\text{CDCl}_3$ )  $\delta$  139.9, 134.1, 133.6, 133.09, 133.07, 129.3, 129.1, 128.3, 128.26, 128.24, 128.1, 126.9, 74.5, 68.5. Analytical data for compound **7** is consistent with literature report.<sup>[5]</sup>

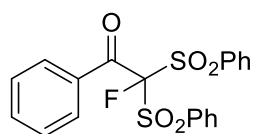

**2-Fluoro-1-phenyl-2,2-bis(phenylsulfonyl)ethan-1-one (8):**  $^1\text{H}$  NMR (400 MHz, Chloroform-*d*)  $\delta$  = 7.98 (d,  $J$  = 7.9 Hz, 4H), 7.75 – 7.70 (m, 2H), 7.62 (d,  $J$  = 7.6 Hz, 2H), 7.57 – 7.54 (m, 5H), 7.36 – 7.32 (m, 2H).  $^{13}\text{C}$  NMR (100 MHz,  $\text{CDCl}_3$ )  $\delta$  162.8, 136.0, 134.9, 134.5, 131.5, 130.3, 129.7, 129.6, 129.3, 128.5, 113.1(d,  $J$  = 282.8 Hz).  $^{19}\text{F}$  NMR (376 MHz,  $\text{CDCl}_3$ )  $\delta$  -166.8. Analytical data for compound **8** is consistent with literature report.<sup>[5]</sup>



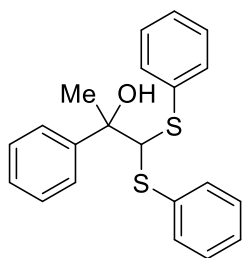

**2-Phenyl-1,1-bis(phenylthio)propan-2-ol (9):**  $^1\text{H}$  NMR (400 MHz,  $\text{CDCl}_3$ )  $\delta$  = 7.54 (d,  $J$  = 7.5 Hz, 2H), 7.31 (dd,  $J$  = 8.0 Hz, 2H), 7.28 – 7.25 (m, 1H), 7.22 – 7.16 (m, 10H), 4.67 (s, 1H), 3.30 (s, 1H), 1.84 (s, 3H).  $^{13}\text{C}$  NMR (100 MHz,  $\text{CDCl}_3$ )  $\delta$  144.4, 135.02, 134.96, 133.3, 133.2, 129.01, 129.00, 128.1, 127.98, 127.95, 127.6, 125.9, 77.8, 76.6, 27.2. Analytical data for compound **9** is consistent with literature report.<sup>[5]</sup>

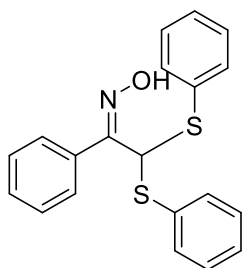

**(Z)-1-Phenyl-2,2-bis(phenylthio)ethan-1-one oxime (10):**  $^1\text{H}$  NMR (400 MHz,  $\text{CDCl}_3$ )  $\delta$  = 7.74 (d,  $J$  = 7.2 Hz, 2H), 7.46 – 7.39 (m, 7H), 7.27 – 7.24 (m, 6H), 6.29 (s, 1H).  $^{13}\text{C}$  NMR (100 MHz,  $\text{CDCl}_3$ )  $\delta$  156.0, 134.5, 133.4, 132.8, 129.7, 129.1, 128.34, 128.25, 128.0, 51.7. HR-MS (ESI)  $m/z$  calcd for  $\text{C}_{20}\text{H}_{18}\text{NOS}_2$   $[\text{M}+\text{H}]^+$  352.0824, found 352.0814.

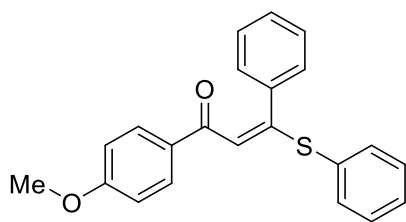

**(E)-1-(4-Methoxyphenyl)-3-phenyl-3-(phenylthio)prop-2-en-1-one (11):**  $^1\text{H}$  NMR (400 MHz,  $\text{CDCl}_3$ )  $\delta$  = 8.05 (d,  $J$  = 8.7 Hz, 2H), 7.24 – 7.19 (m, 5H), 7.16 – 7.13 (m, 3H), 7.09 – 7.05 (m, 3H), 6.98 (d,  $J$  = 8.7 Hz, 2H), 3.89 (s, 3H).  $^{13}\text{C}$  NMR (100 MHz,  $\text{CDCl}_3$ )  $\delta$  187.5, 163.2, 161.0, 139.0, 134.4, 133.0, 131.5, 130.6, 129.1, 128.4, 127.9, 120.1, 113.9, 55.6. Analytical data for compound **11** is consistent with literature report.

[6]

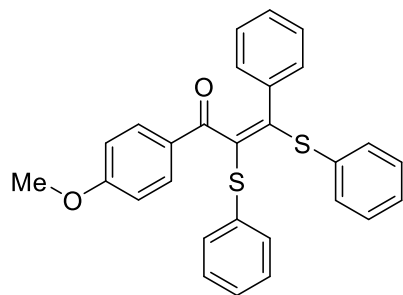

**(Z)-1-(4-Methoxyphenyl)-3-phenyl-2,3-bis(phenylthio)prop-2-en-1-one (12):**  $^1\text{H}$  NMR (400 MHz,  $\text{CDCl}_3$ )  $\delta$  = 7.92 (d,  $J$  = 8.8 Hz, 2H), 7.54 – 7.50 (m, 2H), 7.30 – 7.26 (m, 4H), 7.24 – 7.21 (m, 1H), 7.16 – 7.12 (m, 5H), 7.07 – 7.05 (m, 3H), 6.91 (d,  $J$  = 8.8 Hz, 2H), 3.87 (s, 3H).  $^{13}\text{C}$  NMR (100 MHz,  $\text{CDCl}_3$ )  $\delta$  190.4, 163.8, 136.9, 136.8, 136.1, 133.6, 133.4, 131.9, 131.8, 131.5, 129.9, 129.3, 128.8, 128.7, 128.5, 128.3, 128.1, 127.4, 113.9, 55.6. Analytical data for compound **12** is consistent with literature report.<sup>[7]</sup>

### Gram-scale synthesis

(a) Gram-scale experiments for **3a**:

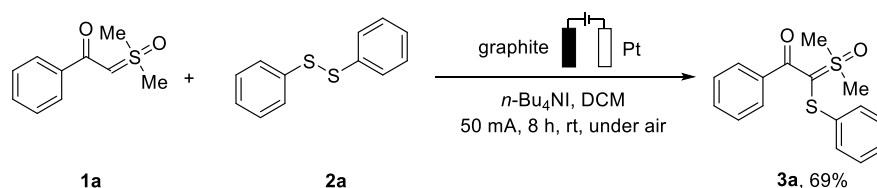

In an undivided cell (250.0 mL) equipped with a stir bar, a mixture of substrates **1a** (10.0 mmol, 1.96 g), **2a** (12.0 mmol, 2.62 g),  $n\text{-Bu}_4\text{NI}$  (10.0 mmol, 3.69 g) and DCM (120.0 mL) were added. The cell was equipped with graphite (3 cm  $\times$  3 cm  $\times$  0.6 cm) as the anode and platinum plate (3 cm  $\times$  3 cm  $\times$  0.01 cm) as the cathode and connected to a DC regulated power supply. The reaction mixture was stirred and electrolyzed at a constant current of 50 mA at room temperature for 8 h. Upon completion, the solvent was further removed directly under reduced pressure to afford the crude product, which was purified by flash column chromatography (PE/EtOAc: 1/2) to give as yellow liquid **3a** (2.10 g, 69%).

(b) Gram-scale experiments for **4a**:

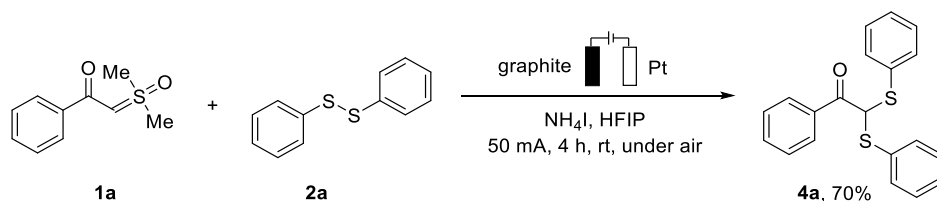

In an undivided cell (250.0 mL) equipped with a stir bar, a mixture of substrates **1a** (10.0 mmol, 1.96 g), **2a** (12.0 mmol, 2.62 g),  $\text{NH}_4\text{I}$  (15.0 mmol, 2.17 g) and HFIP (120 mL) were added. The cell was equipped with graphite (3 cm  $\times$  3 cm  $\times$  0.6 cm) as the anode and platinum plate (3 cm  $\times$  3 cm  $\times$  0.01 cm) as the cathode and connected to a DC regulated power supply. The reaction mixture was stirred and electrolyzed at a constant current of 50 mA at room temperature for 4 h. Upon completion, the solvent was further removed directly under reduced pressure to afford the crude product, which was purified by flash column chromatography (PE/EtOAc: 15/1) to give as yellow liquid **4a** (2.35 g, 70%).

### The Synthetic Application of Compound 4a

(a) Procedure for the synthesis of **4a**

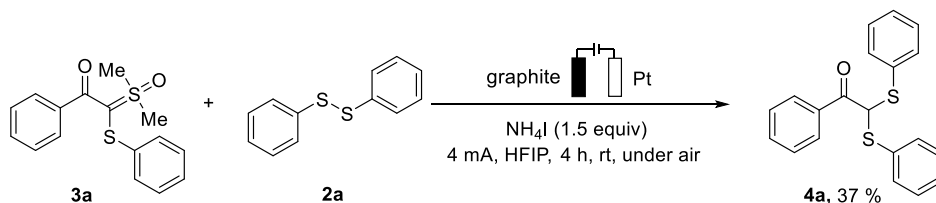

In an undivided cell (30 mL) equipped with a stirring bar, a mixture of substrates **3a** (0.5 mmol, 152 mg), **2a** (0.6 mmol, 131 mg),  $\text{NH}_4\text{I}$  (0.75 mmol, 109 mg) and HFIP (6 mL) were added. The reaction mixture was stirred and electrolyzed at a constant current of 4 mA at room temperature for 4 h. Upon completion, the solvent was further removed directly under reduced pressure to afford the crude product, which was purified by flash column chromatography (PE/EtOAc: 15/1) to give **4a** (62 mg, 37%).

(b) Procedure for the synthesis of 1-phenyl-2,2-bis(phenylsulfonyl)ethan-1-one (**6**)<sup>[5]</sup>

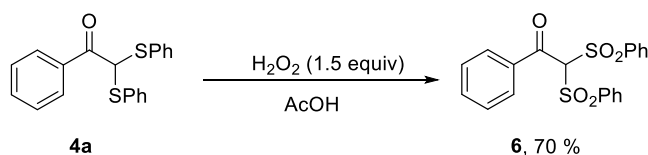

To a solution of compound **4a** (0.2 mmol, 67.3 mg) in AcOH (2 mL) was added H<sub>2</sub>O<sub>2</sub> (0.3 mmol, 30% in H<sub>2</sub>O). After stirring for 2 h at room temperature, the reaction mixture was allowed to slowly warm up to 50 °C and stir overnight. After the reaction completed, the mixture was cooled to room temperature, and concentrated in vacuo. The crude compound was purified by flash column chromatography (PE/EA: 1/1) to give as white solid (56.1 mg, 70%).

(c) Procedure for the synthesis of 1-phenyl-2,2-bis(phenylthio)ethan-1-ol (**7**)<sup>[5]</sup>

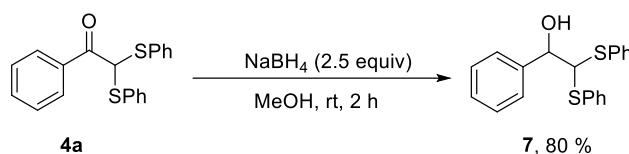

To a solution of compound **4a** (0.2 mmol, 67.3 mg) in MeOH (2 mL) at 0 °C was added NaBH<sub>4</sub> (0.5 mmol, 19.4 mg). After stirring for 2 h at room temperature, the resulting mixture was quenched with saturated NH<sub>4</sub>Cl (aq.) and extracted with EtOAc. The organic phase was dried over Na<sub>2</sub>SO<sub>4</sub> and concentrated in vacuo. The crude compound was purified by flash column chromatography (PE/EA: 10/1) to give as colorless liquid (54.1 mg, 80%).

(d) Procedure for the synthesis of 2-fluoro-1-phenyl-2,2-bis(phenylsulfonyl)ethan-1-one (**8**)<sup>[5]</sup>

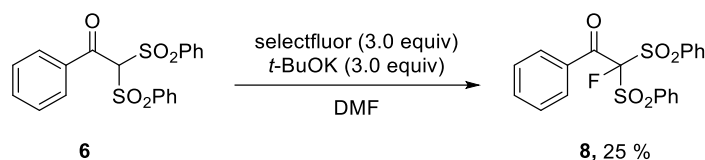

To a solution of compound **6** (0.2 mmol, 80 mg) in 2 mL DMF was added *t*-BuOK (0.6 mmol, 67.3 mg). The reaction was stirred at room temperature for 20 min before Selectfluor (0.6 mmol, 213 mg) in 2 mL DMF was added slowly. After stirring for 2 h at room temperature, the resulting mixture was quenched by water and extracted with EtOAc. The organic phase was dried over Na<sub>2</sub>SO<sub>4</sub> and concentrated in vacuo. The crude compound was purified by flash column chromatography (PE/EA/DCM: 7/1/3) to give as colorless liquid (17.8 mg, 25%).

(e) Procedure for the synthesis of 2-phenyl-1,1-bis(phenylthio)propan-2-ol (**9**)<sup>[5]</sup>

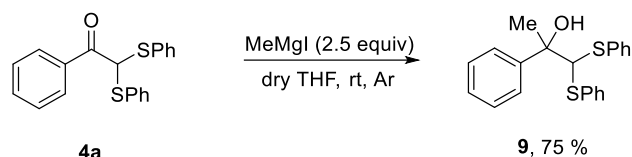

To a solution of compound **4a** (0.5 mmol, 168 mg) in dry THF (5 mL) was added methylmagnesium iodide (1.25 mmol, 208 mg) at 0 °C under argon atmosphere. After stirring for 5 h at room temperature, the resulting mixture was quenched with saturated  $\text{NH}_4\text{Cl}$  (aq) and extracted with EtOAc. The organic phase was dried over  $\text{Na}_2\text{SO}_4$  and concentrated in vacuo. The crude compound was purified by flash column chromatography (PE/EtOAc: 10/1) to give as colorless liquid (132 mg, 75%).

(f) Procedure for the synthesis of (*Z*)-1-phenyl-2,2-bis(phenylthio)ethan-1-one oxime (**10**)<sup>[8]</sup>

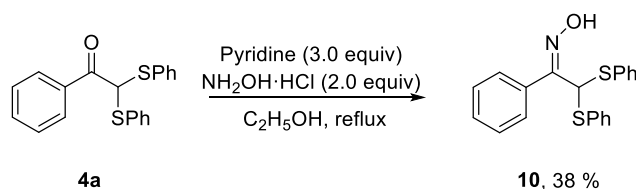

To a solution of compound **4a** (0.2 mmol, 67.3mg) in  $\text{C}_2\text{H}_5\text{OH}$  (10 mL) was added  $\text{NH}_2\text{Cl}\cdot\text{H}_2\text{O}$  (0.4 mmol, 27.8 mg) and Pyridine (0.6 mmol, 47.5 mg). The reaction mixture were refluxed at 80 °C for 2 h. After completion of the reaction as indicated by thin-layer chromatography (TLC), the solvent was evaporated. The reaction was quenched with water (10 mL) and extracted with EtOAc ( $2 \times 10$  mL). The organic phase was dried over  $\text{Na}_2\text{SO}_4$  and concentrated in vacuo. The crude compound was purified by flash column chromatography (PE/EtOAc: 1/3) to give as yellow liquid (26.7 mg, 38%).

(g) Procedure for the synthesis of (*E*)-1-(4-methoxyphenyl)-3-phenyl-3-(phenylthio)prop-2-en-1-one (**11**) and (*Z*)-1-(4-methoxyphenyl)-3-phenyl-2,3-bis(phenylthio)prop-2-en-1-one (**12**)<sup>[9]</sup>

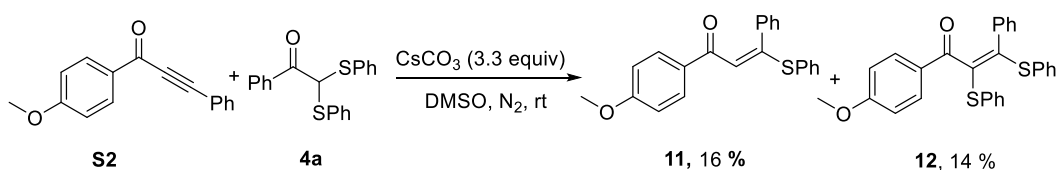



directly under reduced pressure to afford the crude product, which was purified by flash column chromatography (PE/EtOAc: 1/1) to give as yellow liquid **5a** (68 mg, 50 %).

(c) Radical scavenger experiments with BHT under condition B

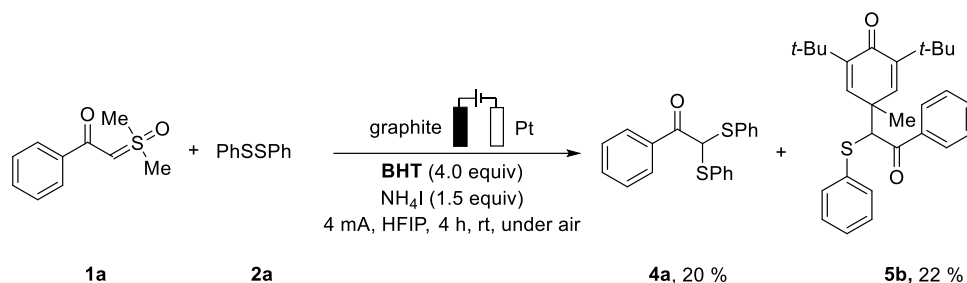

In an undivided cell (30 mL) equipped with a stirring bar, a mixture of substrates **1a** (0.5 mmol, 98 mg), BHT (4.0 mmol, 440 mg), **2a** (0.6 mmol, 131 mg), NH<sub>4</sub>I (0.75 mmol, 109 mg) and HFIP (6 mL) were added. The reaction mixture was stirred and electrolyzed at a constant current of 4 mA at room temperature for 4 h. Upon completion, the solvent was further removed directly under reduced pressure to afford the crude product, which was purified by flash column chromatography (PE/EtOAc: 15/1) to give **4a** (34 mg, 20%) and yellow liquid **5b** (50 mg, 22%).

(d) Reactions of **3a** and **2a** under standard condition B

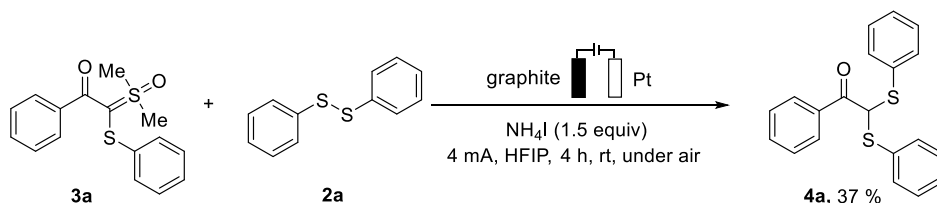

In an undivided cell (30 mL) equipped with a stirring bar, a mixture of substrates **3a** (0.5 mmol, 152 mg), **2a** (0.6 mmol, 131 mg), NH<sub>4</sub>I (0.75 mmol, 109 mg) and HFIP (6 mL) were added. The reaction mixture was stirred and electrolyzed at a constant current of 4 mA at room temperature for 4 h. Upon completion, the solvent was further removed directly under reduced pressure to afford the crude product, which was purified by flash column chromatography (PE/EtOAc: 15/1) to give **4a** (62 mg, 37%).

(e) Reactions of **5c** and **2a** under standard condition B

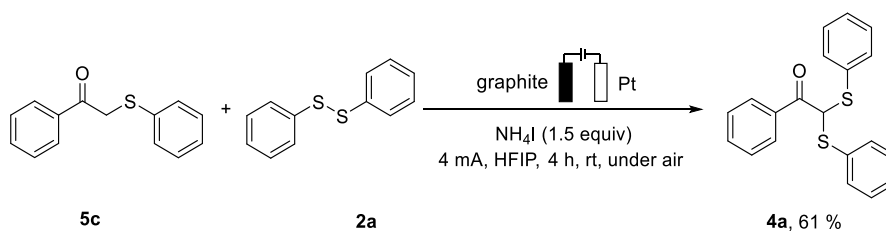

In an undivided cell (30 mL) equipped with a stirring bar, a mixture of substrates **5c** (0.5 mmol, 114 mg), **2a** (0.6 mmol, 131 mg), NH<sub>4</sub>I (0.75 mmol, 109 mg) and HFIP (6 mL) were added. The reaction mixture was stirred and electrolyzed at a constant current of 4 mA at room temperature for 4 h. Upon completion, the solvent was further removed directly under reduced pressure to afford the crude product, which was purified by flash column chromatography (PE/EtOAc: 15/1) to give **4a** (102 mg, 61%).

(f) Reactions of **5d** and **2f** under standard condition B

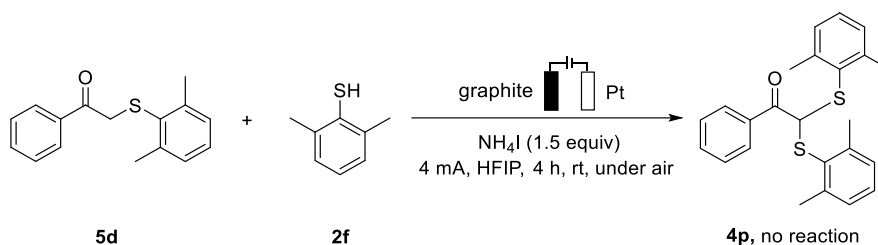

In an undivided cell (30 mL) equipped with a stirring bar, a mixture of substrates **5d** (0.5 mmol, 128 mg), **2f** (0.6 mmol, 83 mg), NH<sub>4</sub>I (0.75 mmol, 109 mg) and HFIP (6 mL) were added. The reaction mixture was stirred and electrolyzed at a constant current of 4 mA at room temperature for 4 h. Upon completion, the reaction does not give the expected product.

### Cyclic Voltammetry Experiment

Cyclic voltammetry experiments were carried out on an IGS 1230 electrochemical workstation (Ingsens instruments, Guangzhou). 0.1 M electrolyte was dissolved in acetonitrile. Working electrode: glassy carbon, counter electrode: Pt, reference electrode: Ag/AgCl (3 M KCl). Scan rate: 100 mV/s.



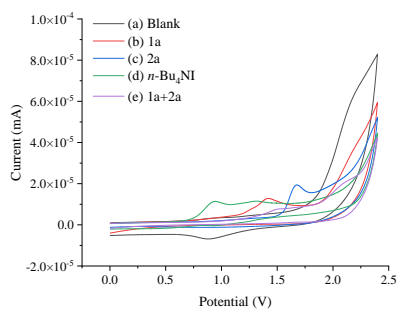

**Figure S2-a.**

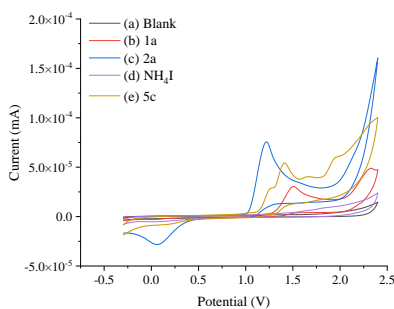

**Figure S2-b.**

**Figure S2-a.** Cyclic voltammograms of condition A. Conditions: a glassy carbon working electrode, a Ag/AgCl (3 M KCl) reference electrode, and a platinum wire counter electrode, 0.01 M analyte in 0.1 M *n*-Bu<sub>4</sub>NI dissolved in DCM, 100 mV/s scan rate. (a) *n*-Bu<sub>4</sub>NPF<sub>6</sub> (1 mM) as blank; (b) **1a** (1 mM); (c) **2a** (1 mM); (d) *n*-Bu<sub>4</sub>NI (1 mM); (e) **1a** and **2a** (1 mM).

**Figure S2-b.** Cyclic voltammograms of condition B. Conditions: a glassy carbon working electrode, a Ag/AgCl (3 M KCl) reference electrode, and a platinum wire counter electrode, 0.01 M analyte in 0.1 M *n*-Bu<sub>4</sub>NPF<sub>6</sub> dissolved in HFIP, 100 mV/s scan rate. (a) *n*-Bu<sub>4</sub>NPF<sub>6</sub> (1 mM) as blank; (b) **1a** (1 mM); (c) **2a** (1 mM); (d) NH<sub>4</sub>I (1 mM) (e) **5c** (1 mM).

## Crystallographic description of **3s** and **4a**

### (a) Crystal structure determination of **3s**

The compound **3s** was crystallized from a mixture of CH<sub>2</sub>Cl<sub>2</sub> and *n*-hexane ether. Suitable single crystal was picked from the mother liquor and covered with perfluorinated polyether oil on a microscope slide. Compound **3s** was collected at 180.00 K on a Rigaku Oxford Diffraction Supernova Dual Source, Cu at Zero equipped with an AtlasS2 CCD using Cu K $\alpha$  radiation. Data reduction was carried out with the diffractometer's software<sup>[10]</sup>. The structure was solved by direct methods using Olex2 software<sup>[11]</sup>, and the non-hydrogen atoms were located from the trial structure and then refined anisotropically with SHELXL-2018<sup>[12]</sup> using a full-matrix least squares procedure based on  $F^2$ . The weighted  $R$  factor,  $wR$  and goodness-of-fit  $S$  values were

obtained based on  $F^2$ . The hydrogen atom positions were fixed geometrically at the calculated distances and allowed to ride on their parent atoms. Crystallographic data has been deposited with the Cambridge Crystallographic Centre and allocated with the deposition numbers: CCDC 2272115. Copies of the data can be obtained free of charge from The Cambridge Crystallographic Data Centre via [www.ccdc.cam.ac.uk/data\\_request/cif](http://www.ccdc.cam.ac.uk/data_request/cif).

### Crystal structure determination of 3s

Crystal Data for  $C_{16}H_{11}F_5O_2S_2$  ( $M = 394.37$  g/mol): triclinic, space group P-1 (no. 2),  $a = 9.0497(5)$  Å,  $b = 9.8617(6)$  Å,  $c = 17.5484(11)$  Å,  $\alpha = 92.637(5)^\circ$ ,  $\beta = 91.848(5)^\circ$ ,  $\gamma = 95.942(5)^\circ$ ,  $V = 1554.97(16)$  Å<sup>3</sup>,  $Z = 4$ ,  $T = 169.99(10)$  K,  $\mu(\text{Mo K}\alpha) = 0.406$  mm<sup>-1</sup>,  $D_{\text{calc}} = 1.685$  g/cm<sup>3</sup>, 9482 reflections measured ( $4.158^\circ \leq 2\theta \leq 50^\circ$ ), 5463 unique ( $R_{\text{int}} = 0.0548$ ,  $R_{\text{sigma}} = 0.0849$ ) which were used in all calculations. The final  $R_1$  was 0.0684 ( $I > 2\sigma(I)$ ) and  $wR_2$  was 0.1752 (all data).

**Table S3 Crystal data and structure refinement for 3s.**

|                                    |                                       |
|------------------------------------|---------------------------------------|
| Identification code                | <b>3s</b>                             |
| Empirical formula                  | $C_{16}H_{11}F_5O_2S_2$               |
| Formula weight                     | 394.37                                |
| Temperature/K                      | 169.99(10)                            |
| Crystal system                     | triclinic                             |
| Space group                        | P-1                                   |
| $a/\text{Å}$                       | 9.0497(5)                             |
| $b/\text{Å}$                       | 9.8617(6)                             |
| $c/\text{Å}$                       | 17.5484(11)                           |
| $\alpha/^\circ$                    | 92.637(5)                             |
| $\beta/^\circ$                     | 91.848(5)                             |
| $\gamma/^\circ$                    | 95.942(5)                             |
| Volume/Å <sup>3</sup>              | 1554.97(16)                           |
| $Z$                                | 4                                     |
| $\rho_{\text{calc}}/\text{g/cm}^3$ | 1.685                                 |
| $\mu/\text{mm}^{-1}$               | 0.406                                 |
| $F(000)$                           | 800.0                                 |
| Crystal size/mm <sup>3</sup>       | $0.16 \times 0.12 \times 0.1$         |
| Radiation                          | Mo K $\alpha$ ( $\lambda = 0.71073$ ) |

|                                                  |                                                                   |
|--------------------------------------------------|-------------------------------------------------------------------|
| 2 $\theta$ range for data collection/ $^{\circ}$ | 4.158 to 50                                                       |
| Index ranges                                     | $-10 \leq h \leq 9$ , $-10 \leq k \leq 11$ , $-18 \leq l \leq 20$ |
| Reflections collected                            | 9482                                                              |
| Independent reflections                          | 5463 [ $R_{\text{int}} = 0.0548$ , $R_{\text{sigma}} = 0.0849$ ]  |
| Data/restraints/parameters                       | 5463/0/455                                                        |
| Goodness-of-fit on $F^2$                         | 1.061                                                             |
| Final R indexes [ $I \geq 2\sigma(I)$ ]          | $R_1 = 0.0684$ , $wR_2 = 0.1653$                                  |
| Final R indexes [all data]                       | $R_1 = 0.0839$ , $wR_2 = 0.1752$                                  |
| Largest diff. peak/hole / $e \text{ \AA}^{-3}$   | 0.53/-0.47                                                        |

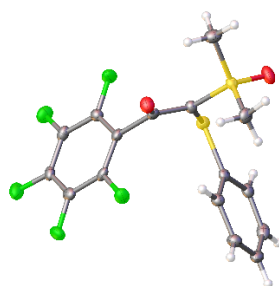

**Figure S3.** X-ray structure of **3s**. Ellipsoids show 30% probability levels. H atoms are omitted for clarity.

**Table S4.** Bond lengths [ $\text{\AA}$ ] and angles [ $^{\circ}$ ] of **3s**

|        |          |           |          |             |          |
|--------|----------|-----------|----------|-------------|----------|
| S1-O2  | 1.440(4) | C23-C24   | 1.406(7) | C11-C12-C13 | 119.2(5) |
| S1-C8  | 1.722(5) | C27-C28   | 1.390(7) | C14-C13-C12 | 120.4(5) |
| S1-C9  | 1.759(5) | C27-C32   | 1.403(7) | C15-C14-C13 | 119.8(5) |
| S1-C10 | 1.764(5) | C28-C29   | 1.384(7) | C14-C15-C16 | 121.0(5) |
| S2-C8  | 1.736(5) | C29-C30   | 1.380(7) | C15-C16-C11 | 119.3(5) |
| S2-C11 | 1.786(5) | C30-C31   | 1.389(8) | C24-S3-C27  | 105.1(2) |
| F1-C2  | 1.345(6) | C31-C32   | 1.371(7) | O4-S4-C24   | 112.3(2) |
| F2-C3  | 1.341(6) |           |          | O4-S4-C25   | 110.5(3) |
| F3-C4  | 1.337(5) |           |          | O4-S4-C26   | 111.3(3) |
| F4-C5  | 1.335(6) |           |          | C24-S4-C25  | 109.6(3) |
| F5-C6  | 1.356(5) | O2-S1-C8  | 112.5(2) | C24-S4-C26  | 109.4(3) |
| O1-C7  | 1.246(6) | O2-S1-C9  | 110.6(3) | C25-S4-C26  | 103.3(3) |
| C1-C2  | 1.390(7) | O2-S1-C10 | 110.9(3) | F8-C17-C18  | 120.6(5) |
| C1-C6  | 1.369(7) | C8-S1-C9  | 109.2(2) | F8-C17-C22  | 119.5(5) |
| C1-C7  | 1.520(6) | C8-S1-C10 | 109.0(3) | C18-C17-C22 | 119.8(5) |
| C2-C3  | 1.378(7) | C9-S1-C10 | 104.3(3) | F7-C18-C17  | 120.1(5) |
| C3-C4  | 1.374(7) | C8-S2-C11 | 105.3(2) | F7-C18-C19  | 119.9(5) |
| C4-C5  | 1.373(7) | C2-C1-C7  | 121.6(4) | C17-C18-C19 | 120.0(5) |
| C5-C6  | 1.383(7) | C6-C1-C2  | 117.0(4) | F6-C19-C18  | 119.6(5) |
| C7-C8  | 1.403(7) | C6-C1-C7  | 121.4(4) | F6-C19-C20  | 120.6(5) |

|         |          |             |          |             |          |
|---------|----------|-------------|----------|-------------|----------|
| C11-C12 | 1.390(7) | F1-C2-C1    | 120.2(4) | C18-C19-C20 | 119.8(5) |
| C11-C16 | 1.387(7) | F1-C2-C3    | 118.2(5) | F10-C20-C19 | 118.3(5) |
| C12-C13 | 1.395(7) | C3-C2-C1    | 121.6(5) | F10-C20-C21 | 120.3(5) |
| C13-C14 | 1.381(8) | F2-C3-C2    | 120.8(5) | C19-C20-C21 | 121.4(5) |
| C14-C15 | 1.372(8) | F2-C3-C4    | 119.4(4) | C20-C21-C23 | 122.3(5) |
| C15-C16 | 1.386(8) | C4-C3-C2    | 119.7(5) | C22-C21-C20 | 117.4(5) |
| S3-C24  | 1.735(5) | F3-C4-C3    | 119.9(5) | C22-C21-C23 | 120.1(4) |
| S3-C27  | 1.782(5) | F3-C4-C5    | 120.0(5) | F9-C22-C17  | 118.6(5) |
| S4-O4   | 1.440(4) | C5-C4-C3    | 120.1(5) | F9-C22-C21  | 119.9(5) |
| S4-C24  | 1.721(5) | F4-C5-C4    | 120.2(5) | C21-C22-C17 | 121.5(5) |
| S4-C25  | 1.758(6) | F4-C5-C6    | 120.7(5) | O3-C23-C21  | 118.3(4) |
| S4-C26  | 1.759(5) | C4-C5-C6    | 119.0(5) | O3-C23-C24  | 124.0(5) |
| F6-C19  | 1.346(6) | F5-C6-C1    | 119.7(4) | C24-C23-C21 | 117.6(4) |
| F7-C18  | 1.342(6) | F5-C6-C5    | 117.7(4) | S4-C24-S3   | 116.9(3) |
| F8-C17  | 1.339(6) | C1-C6-C5    | 122.6(5) | C23-C24-S3  | 126.1(4) |
| F9-C22  | 1.338(6) | O1-C7-C1    | 117.8(4) | C23-C24-S4  | 116.8(4) |
| O3-C23  | 1.247(6) | O1-C7-C8    | 124.7(4) | C28-C27-S3  | 123.3(4) |
| C17-C18 | 1.360(8) | C8-C7-C1    | 117.4(4) | C28-C27-C32 | 119.4(5) |
| C17-C22 | 1.394(7) | S1-C8-S2    | 116.3(3) | C32-C27-S3  | 117.3(4) |
| C18-C19 | 1.377(8) | C7-C8-S1    | 116.8(3) | C29-C28-C27 | 119.7(4) |
| C19-C20 | 1.382(7) | C7-C8-S2    | 126.8(4) | C30-C29-C28 | 121.1(5) |
| C20-C21 | 1.385(7) | C12-C11-S2  | 122.3(4) | C29-C30-C31 | 118.8(5) |
| C21-C22 | 1.379(7) | C16-C11-S2  | 117.3(4) | C32-C31-C30 | 121.3(5) |
| C21-C23 | 1.515(7) | C16-C11-C12 | 120.3(5) | C31-C32-C27 | 119.7(5) |

### (b) Crystal structure determination of **4a**

The compound **4a** was crystallized from a mixture of CH<sub>2</sub>Cl<sub>2</sub> and *n*-hexane ether. Suitable single crystal was picked from the mother liquor and covered with perfluorinated polyether oil on a microscope slide. Compound **4a** was collected at 180.00 K on a Rigaku Oxford Diffraction Supernova Dual Source, Cu at Zero equipped with an AtlasS2 CCD using Cu K $\alpha$  radiation. Data reduction was carried out with the diffractometer's software<sup>[10]</sup>. The structure was solved by direct methods using Olex2 software<sup>[11]</sup>, and the non-hydrogen atoms were located from the trial structure and then refined anisotropically with SHELXL-2018<sup>[12]</sup> using a full-matrix least squares procedure based on  $F^2$ . The weighted  $R$  factor,  $wR$  and goodness-of-fit  $S$  values were obtained based on  $F^2$ . The hydrogen atom positions were fixed geometrically at the

calculated distances and allowed to ride on their parent atoms. Crystallographic data has been deposited with the Cambridge Crystallographic Centre and allocated with the deposition numbers: CCDC 2272099. Copies of the data can be obtained free of charge from The Cambridge Crystallographic Data Centre via [www.ccdc.cam.ac.uk/data\\_request/cif](http://www.ccdc.cam.ac.uk/data_request/cif).

### Crystal structure determination of 4a

**Crystal Data** for C<sub>20</sub>H<sub>16</sub>OS<sub>2</sub> (*M* = 336.45 g/mol): monoclinic, space group P2<sub>1</sub>/n (no. 14), *a* = 10.0077(5) Å, *b* = 11.6105(5) Å, *c* = 14.5031(7) Å, *β* = 99.121(4)°, *V* = 1663.87(14) Å<sup>3</sup>, *Z* = 4, *T* = 169.98(10) K, *μ*(Mo Kα) = 0.321 mm<sup>-1</sup>, *D*<sub>calc</sub> = 1.343 g/cm<sup>3</sup>, 7621 reflections measured (4.516° ≤ 2Θ ≤ 49.998°), 2934 unique (*R*<sub>int</sub> = 0.0190, *R*<sub>sigma</sub> = 0.0248) which were used in all calculations. The final *R*<sub>1</sub> was 0.0305 (*I* > 2σ(*I*)) and *wR*<sub>2</sub> was 0.0752 (all data).

**Table S5 Crystal data and structure refinement for 4a.**

|                                           |                                                 |
|-------------------------------------------|-------------------------------------------------|
| Identification code                       | <b>4a</b>                                       |
| Empirical formula                         | C <sub>20</sub> H <sub>16</sub> OS <sub>2</sub> |
| Formula weight                            | 336.45                                          |
| Temperature/K                             | 169.98(10)                                      |
| Crystal system                            | monoclinic                                      |
| Space group                               | P2 <sub>1</sub> /n                              |
| <i>a</i> /Å                               | 10.0077(5)                                      |
| <i>b</i> /Å                               | 11.6105(5)                                      |
| <i>c</i> /Å                               | 14.5031(7)                                      |
| <i>α</i> /°                               | 90                                              |
| <i>β</i> /°                               | 99.121(4)                                       |
| <i>γ</i> /°                               | 90                                              |
| Volume/Å <sup>3</sup>                     | 1663.87(14)                                     |
| <i>Z</i>                                  | 4                                               |
| <i>ρ</i> <sub>calc</sub> /cm <sup>3</sup> | 1.343                                           |
| <i>μ</i> /mm <sup>-1</sup>                | 0.321                                           |
| F(000)                                    | 704.0                                           |
| Crystal size/mm <sup>3</sup>              | 0.15 × 0.12 × 0.1                               |
| Radiation                                 | Mo Kα (λ = 0.71073)                             |
| 2Θ range for data collection/°            | 4.516 to 49.998                                 |

|                                             |                                                               |
|---------------------------------------------|---------------------------------------------------------------|
| Index ranges                                | -11 ≤ h ≤ 9, -13 ≤ k ≤ 11, -16 ≤ l ≤ 17                       |
| Reflections collected                       | 7621                                                          |
| Independent reflections                     | 2934 [R <sub>int</sub> = 0.0190, R <sub>sigma</sub> = 0.0248] |
| Data/restraints/parameters                  | 2934/0/208                                                    |
| Goodness-of-fit on F <sup>2</sup>           | 1.069                                                         |
| Final R indexes [I ≥ 2σ (I)]                | R <sub>1</sub> = 0.0305, wR <sub>2</sub> = 0.0722             |
| Final R indexes [all data]                  | R <sub>1</sub> = 0.0361, wR <sub>2</sub> = 0.0752             |
| Largest diff. peak/hole / e Å <sup>-3</sup> | 0.22/-0.20                                                    |

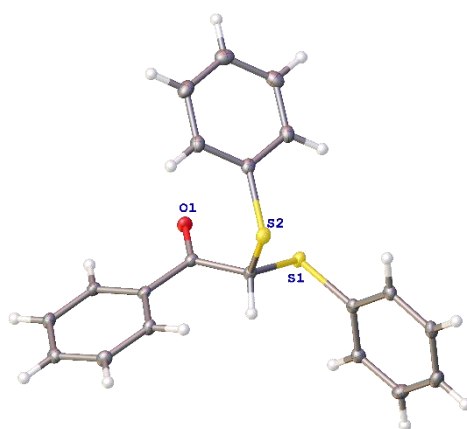

**Figure S4.** X-ray structure of **4a**. Ellipsoids show 30% probability levels. H atoms are omitted for clarity.

**Table S6.** Bond lengths [Å] and angles [°] of **4a**

|         |            |           |            |             |            |
|---------|------------|-----------|------------|-------------|------------|
| S1-C1   | 1.7851(16) | C15-C16   | 1.388(2)   | C8-C7-S2    | 109.37(10) |
| S1-C7   | 1.8200(15) | C16-C17   | 1.381(3)   | O1-C8-C7    | 119.43(14) |
| S2-C7   | 1.8302(16) | C17-C18   | 1.381(3)   | O1-C8-C9    | 122.04(14) |
| S2-C15  | 1.7771(17) | C18-C19   | 1.379(3)   | C9-C8-C7    | 118.52(13) |
| O1-C8   | 1.2140(19) | C19-C20   | 1.380(3)   | C10-C9-C8   | 123.34(14) |
| C1-C2   | 1.391(2)   |           |            | C14-C9-C8   | 117.49(14) |
| C1-C6   | 1.386(2)   |           |            | C14-C9-C10  | 119.10(15) |
| C2-C3   | 1.386(2)   |           |            | C11-C10-C9  | 120.12(15) |
| C3-C4   | 1.379(3)   | C1-S1-C7  | 98.76(7)   | C12-C11-C10 | 120.20(15) |
| C4-C5   | 1.379(3)   | C15-S2-C7 | 102.50(7)  | C11-C12-C13 | 119.89(15) |
| C5-C6   | 1.382(2)   | C2-C1-S1  | 121.42(12) | C14-C13-C12 | 120.23(15) |
| C7-C8   | 1.523(2)   | C6-C1-S1  | 118.83(12) | C13-C14-C9  | 120.45(15) |
| C8-C9   | 1.492(2)   | C6-C1-C2  | 119.72(15) | C16-C15-S2  | 118.91(13) |
| C9-C10  | 1.395(2)   | C3-C2-C1  | 119.65(16) | C16-C15-C20 | 119.99(16) |
| C9-C14  | 1.391(2)   | C4-C3-C2  | 120.32(17) | C20-C15-S2  | 121.04(13) |
| C10-C11 | 1.384(2)   | C3-C4-C5  | 120.01(17) | C17-C16-C15 | 119.77(17) |
| C11-C12 | 1.383(2)   | C4-C5-C6  | 120.18(17) | C18-C17-C16 | 120.25(18) |

|         |          |          |            |             |            |
|---------|----------|----------|------------|-------------|------------|
| C12-C13 | 1.383(2) | C5-C6-C1 | 120.09(16) | C19-C18-C17 | 119.93(18) |
| C13-C14 | 1.378(2) | S1-C7-S2 | 115.66(9)  | C18-C19-C20 | 120.34(18) |
| C15-C15 | 1.386(2) | C8-C7-S1 | 108.74(10) | C19-C20-C15 | 119.72(17) |

## References

- [1] Wang, X.-T., Song, J.-L., Zhong, M., Kang, H.-J., Xie, H., Che, T., Shu, B., Peng, D., Zhang, L. and Zhang, S.-S. *Eur. J. Org. Chem.*, **2020**, 3635-3639.
- [2] Zou, L.-H., Priebbenow, D.L., Wang, L., Mottweiler, J. and Bolm, C. *Adv. Synth. Catal.*, **2013**, 355, 2558–2563.
- [3] Dias, R. M. P. and Burtoloso, A. C. B. *Org. Lett.*, **2016**, 18, 3034-3037.
- [4] Duan, B., Li, H., Chen, Y., Xu, C., Yin, G. *Tetrahedron Lett.*, **2022**, 94, 153697.
- [5] Zhu, Z., Tang, X., Cen, J., Wu, W., Jiang H. *Chem, Commun.*, **2018**, 54, 3767-3770.
- [6] Zhao, Y.-M., Wang, X., Guo, Z.-Y., Li, H., Zhang, J.-T., Xie M.-H. *J. Org. Chem.* **2022**, 87, 11796–11804.
- [7] Shankar, R., Jha, A. k., Singh, U. S., Hajela, K. *Tetrahedron Lett.*, **2006**, 47 3077–3079.
- [8] Ding, Q., Wu, J. *Adv. Synth. Catal.*, **2008**, 350, 1850-1854.
- [9] Yang, Y., Cheng, L., Wang, M., Yin, L., Feng, Y., Wang, C., Li, Y. *Org. Lett.* **2021**, 23, 5339–5343.
- [10] Dolomanov, O. V.; Bourhis, L. J., *J. Appl. Cryst.*, **2009**, 42, 339-341.
- [11] Bourhis, L.J.; Puschmann, H. *Acta Cryst.*, **2015**, A71, 59-75.
- [12] Sheldrick, G.M.; *Acta Cryst.*, **2015**, C71, 3-8.

# NMR Spectra

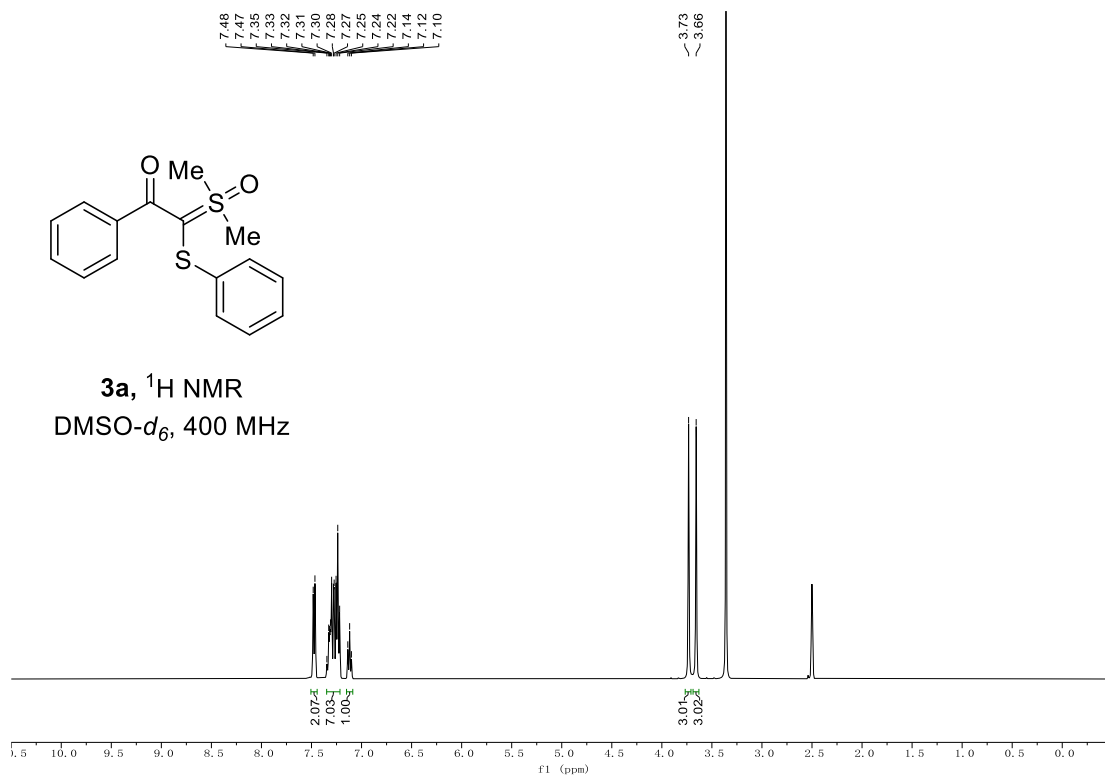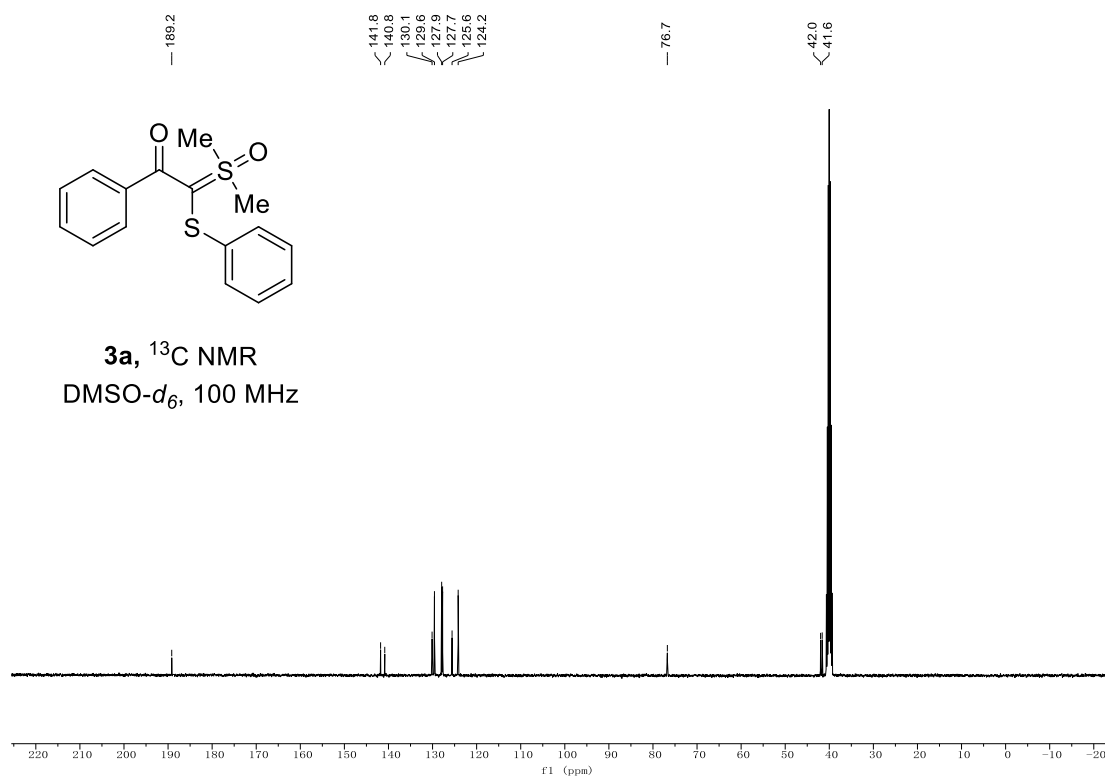



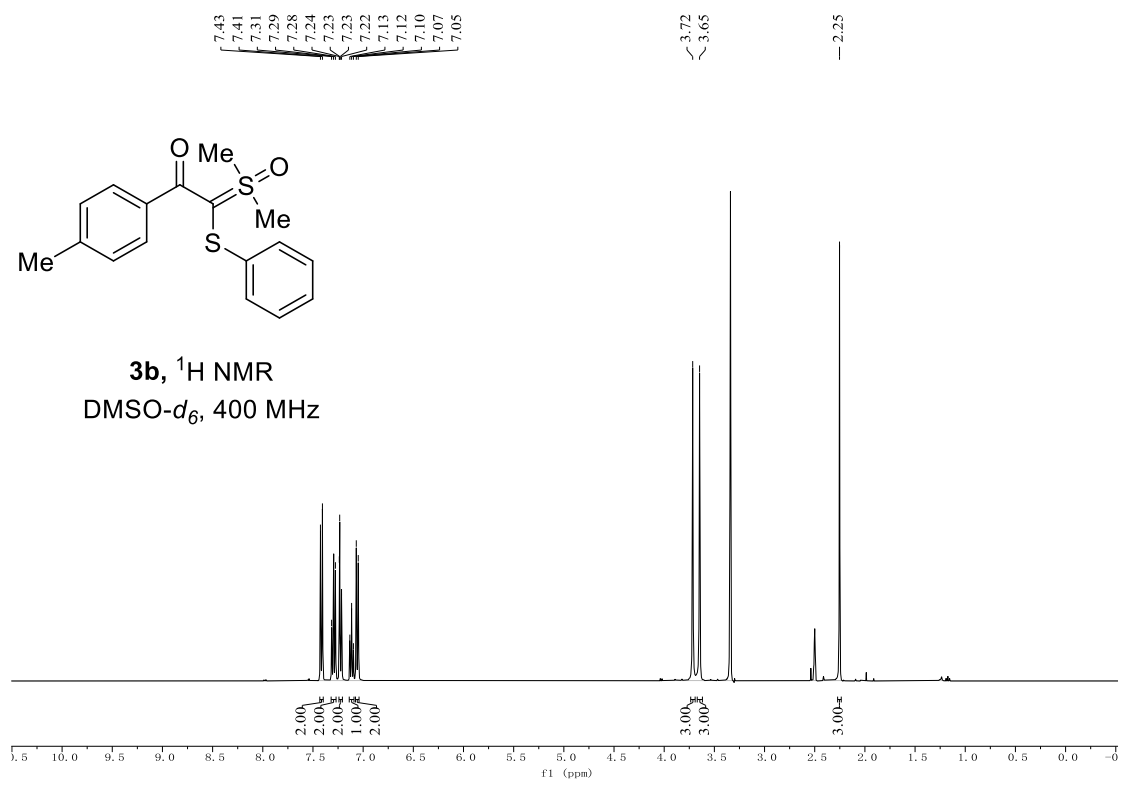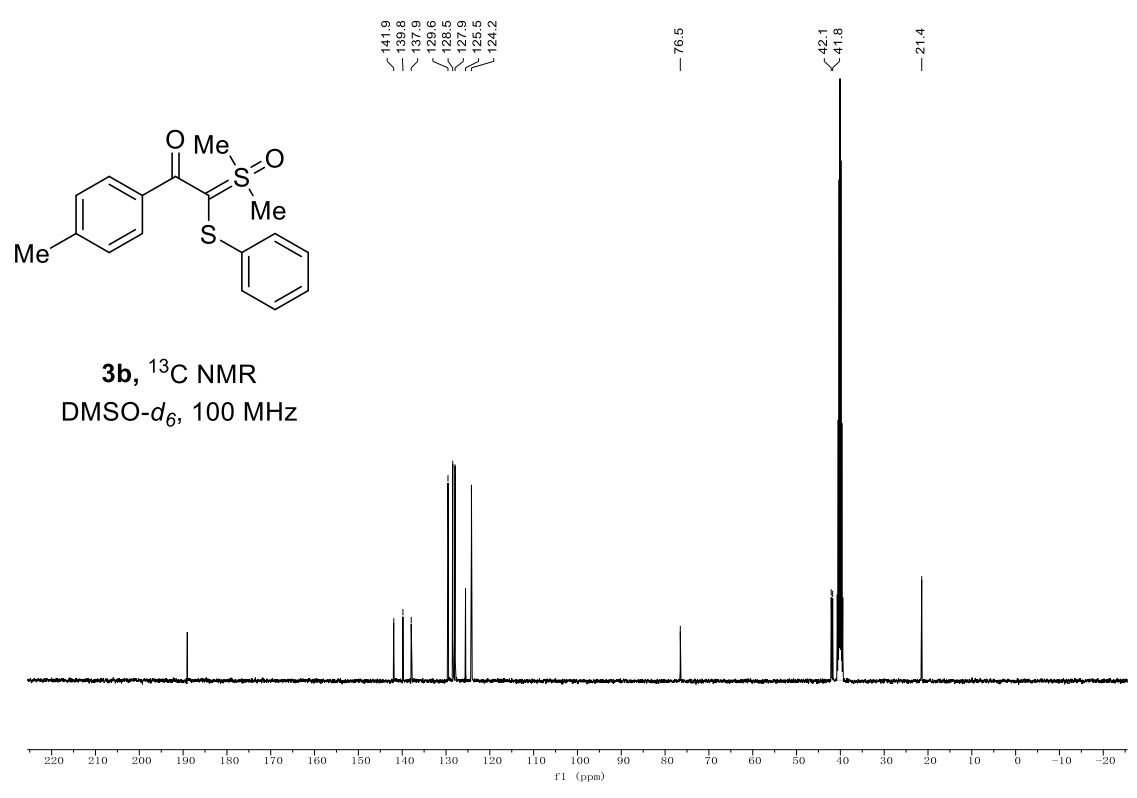

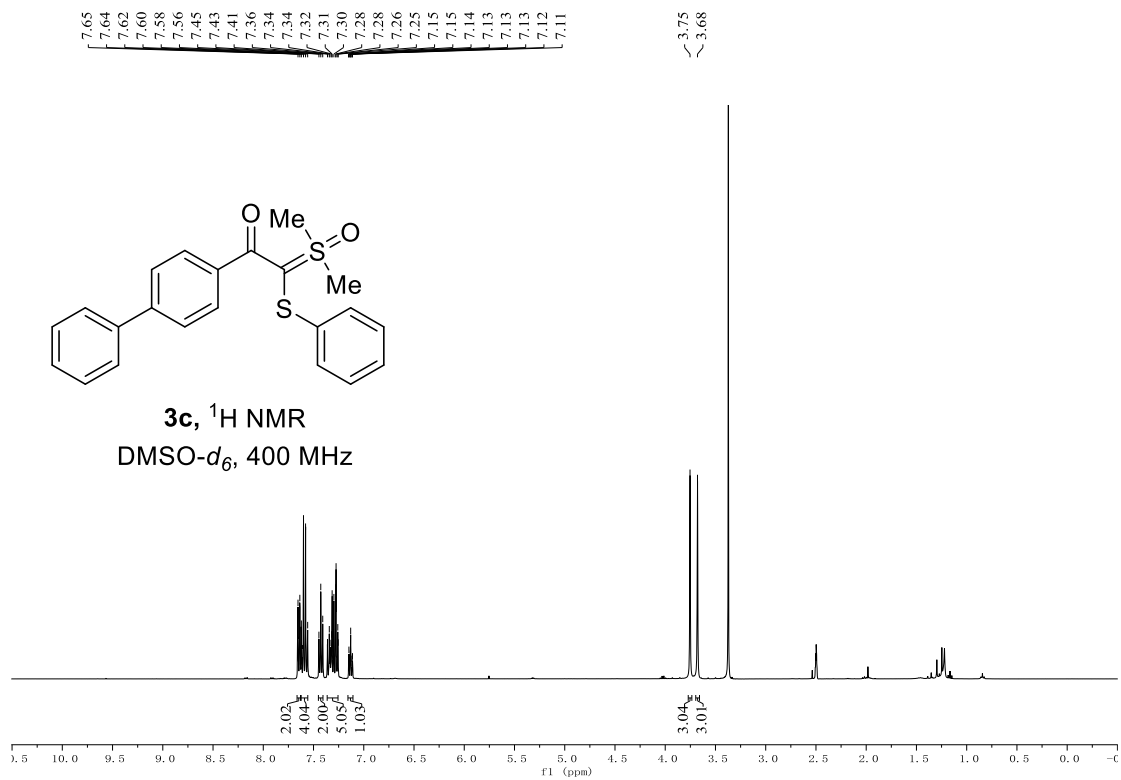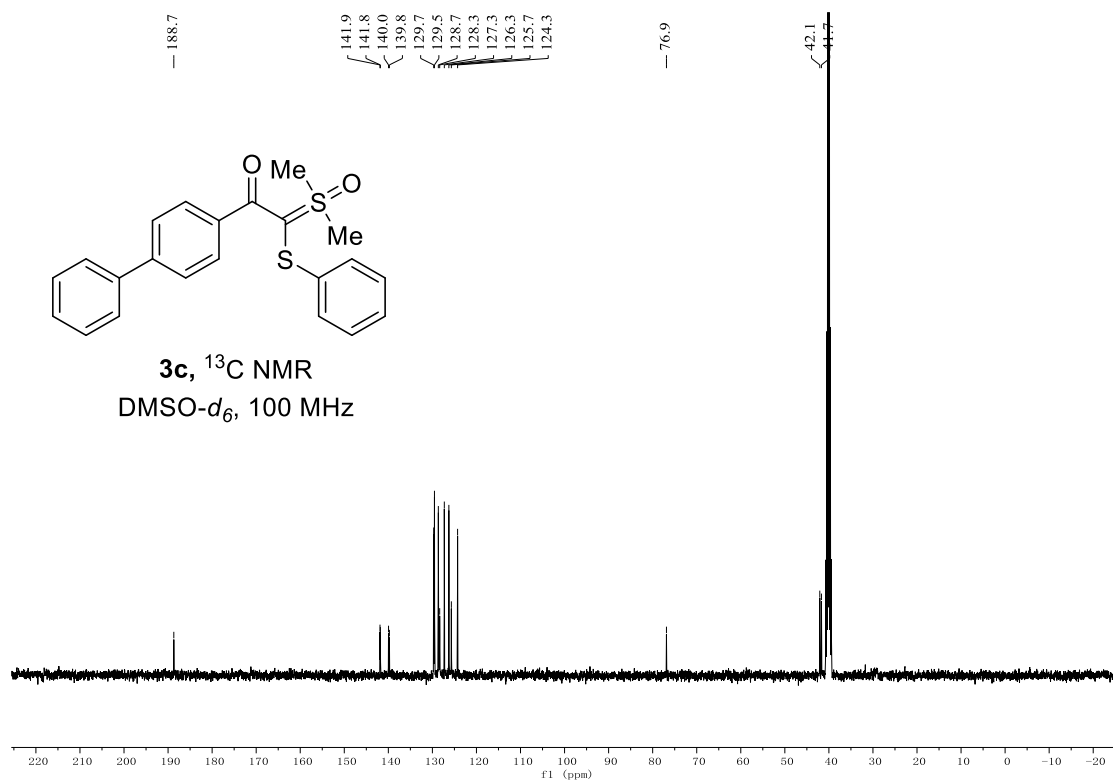

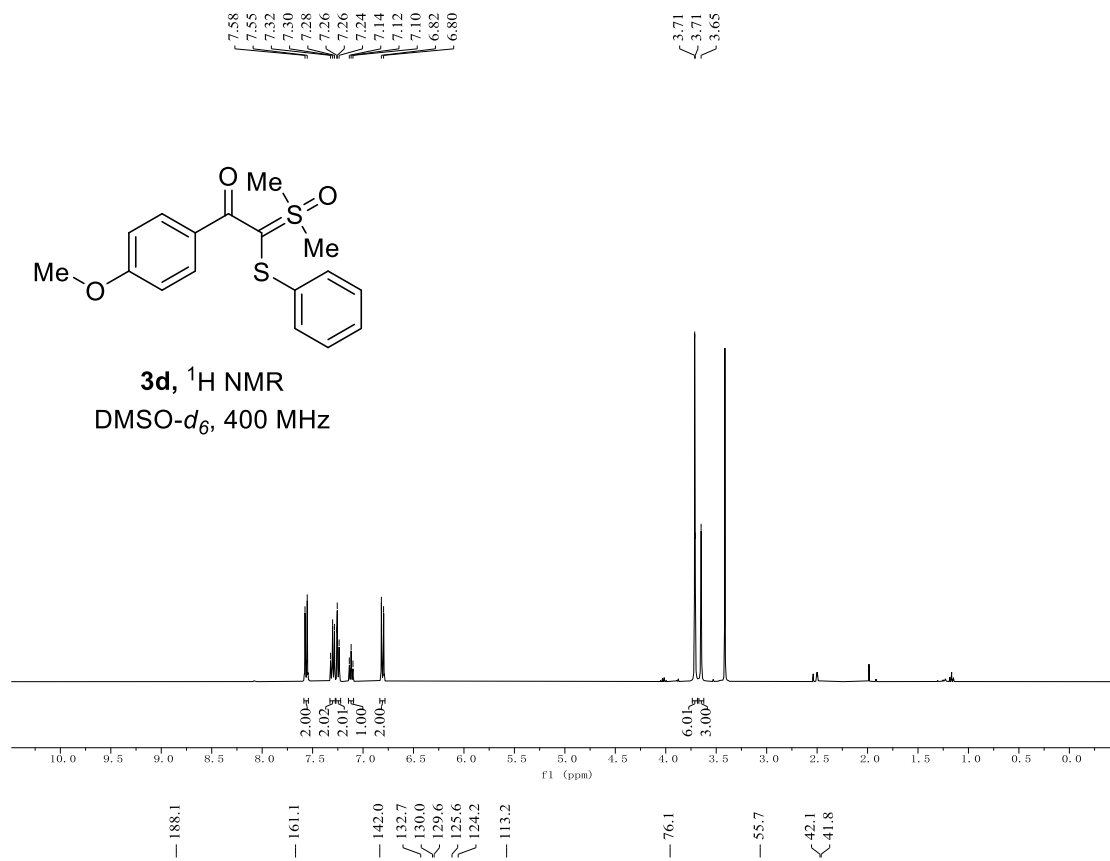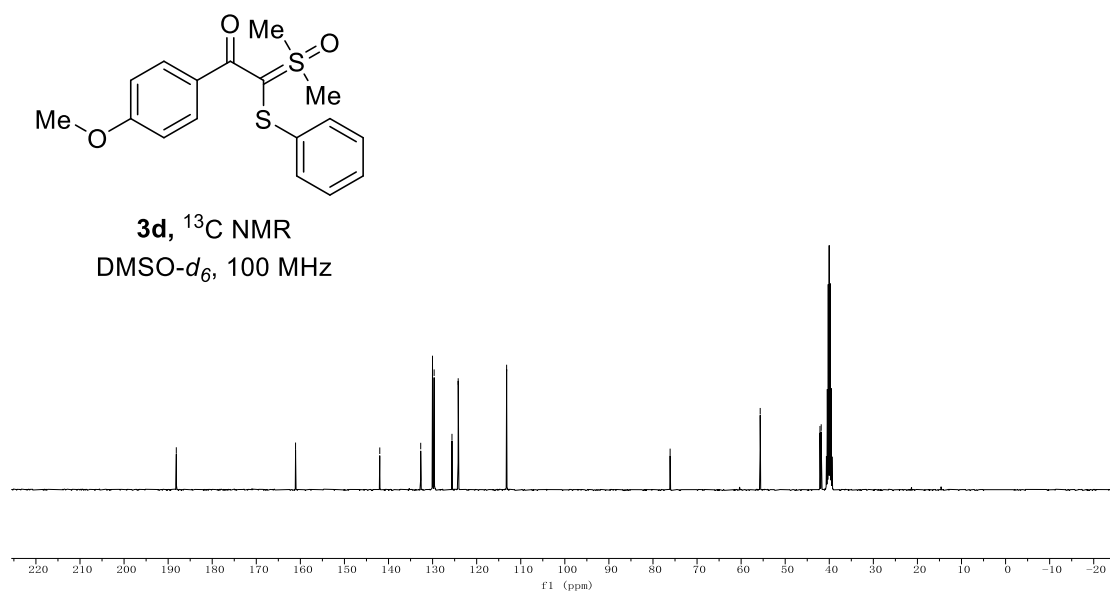

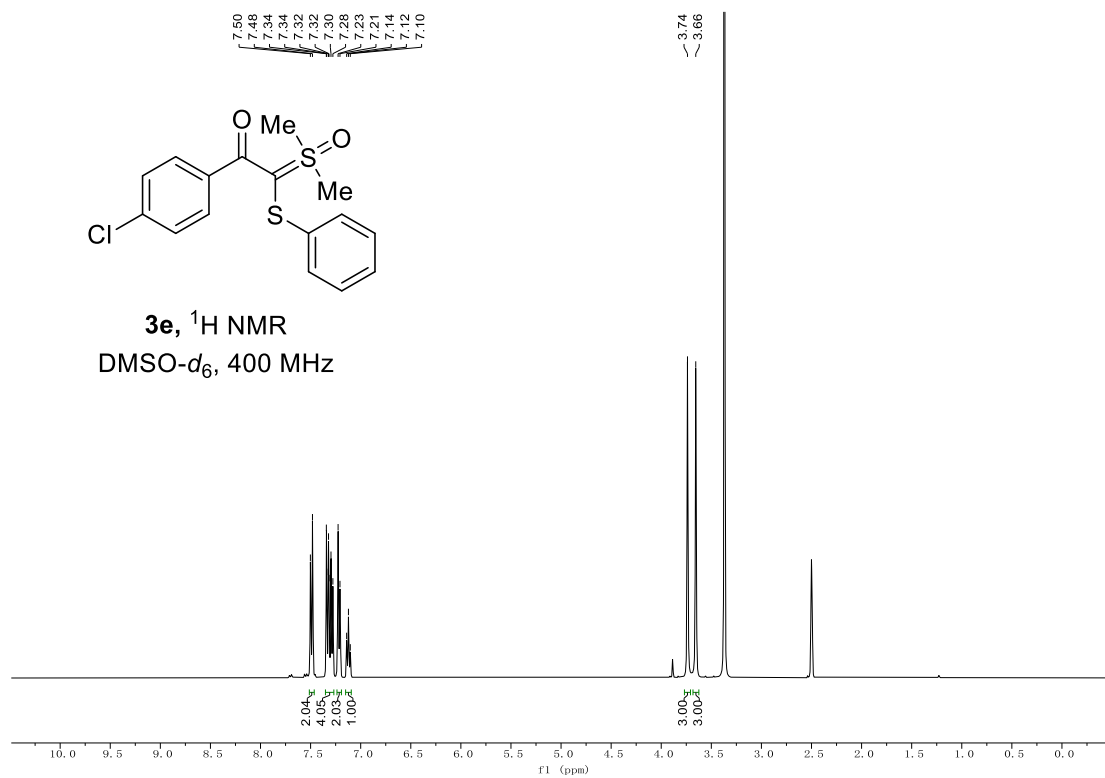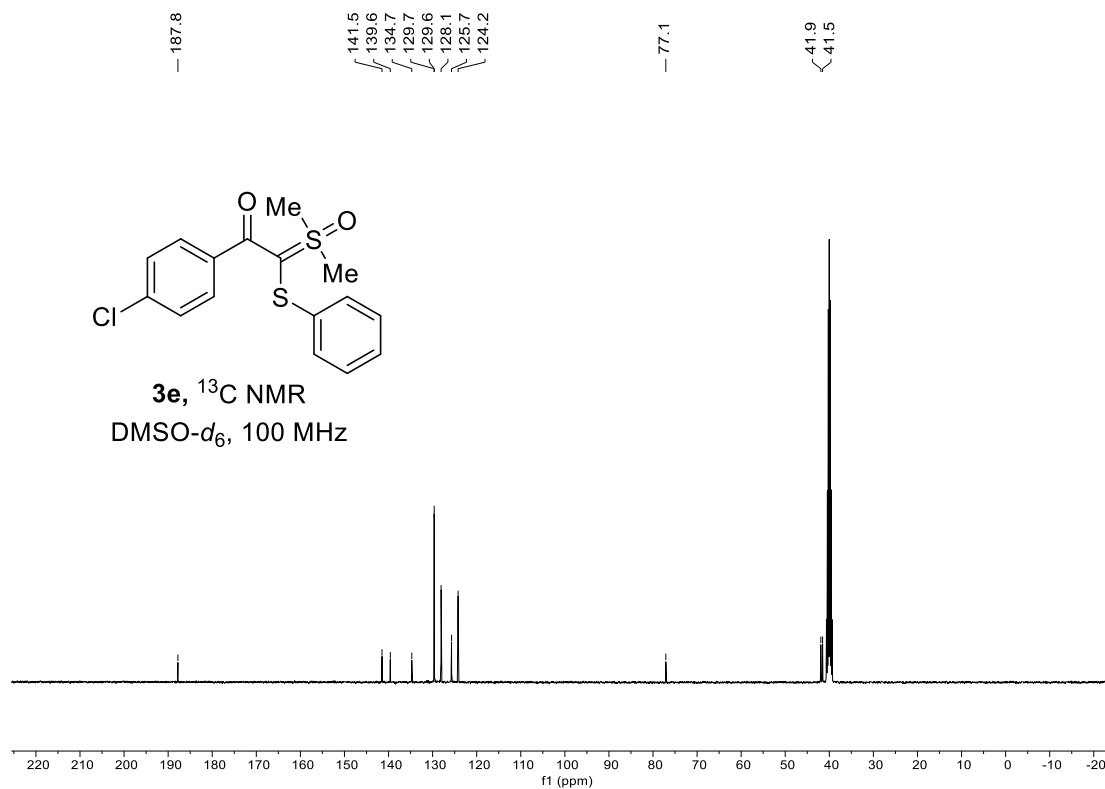

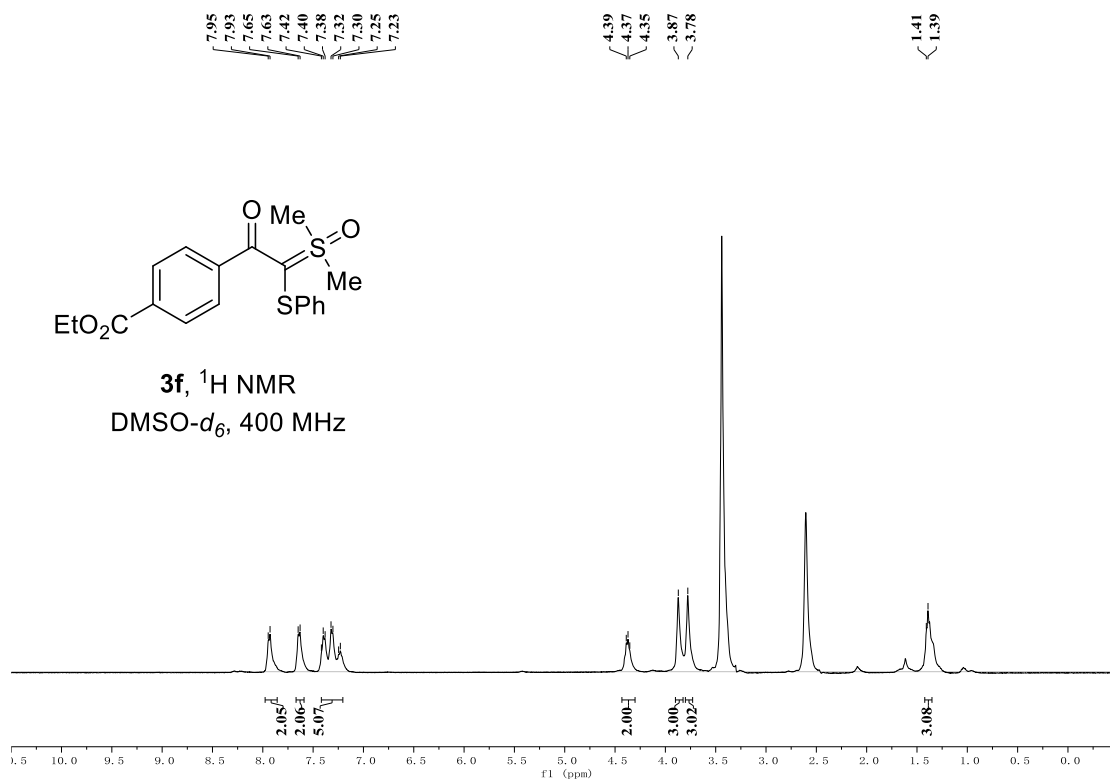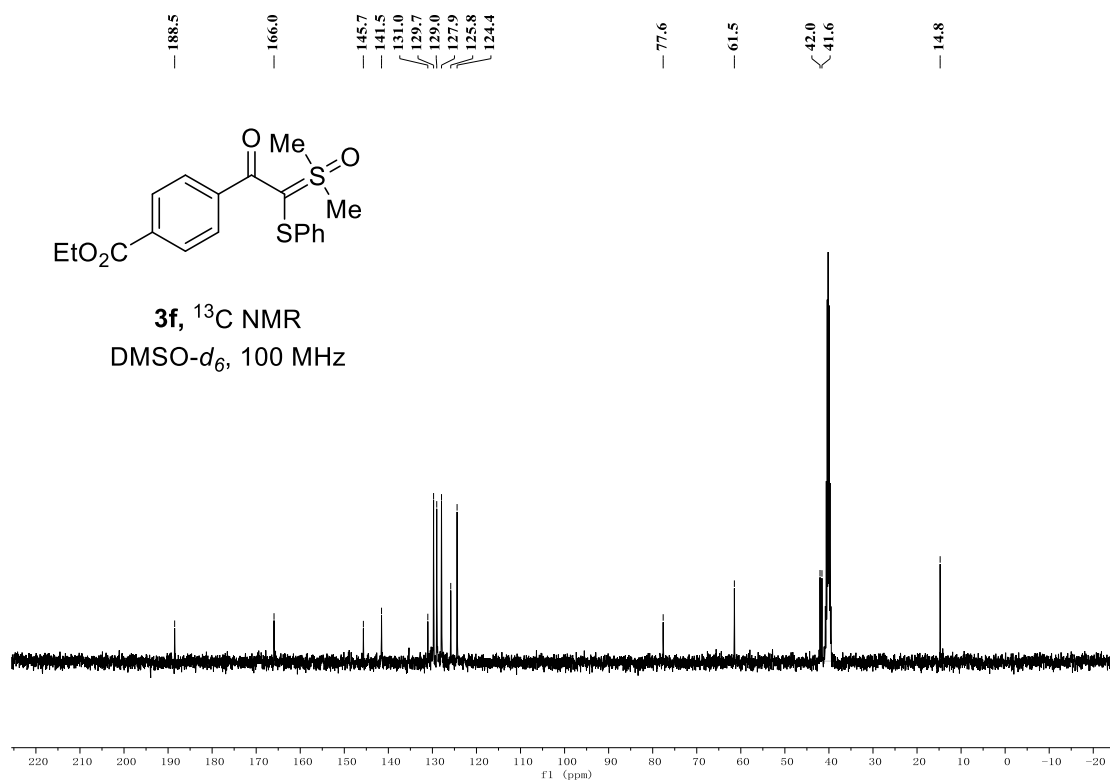

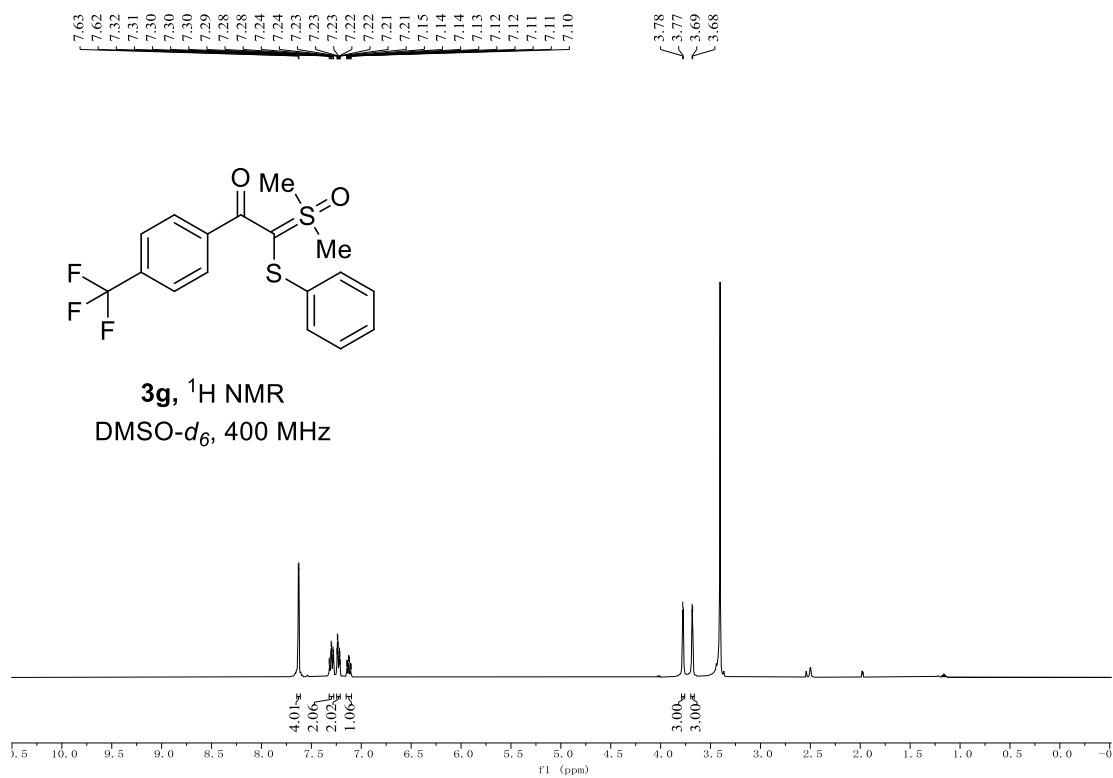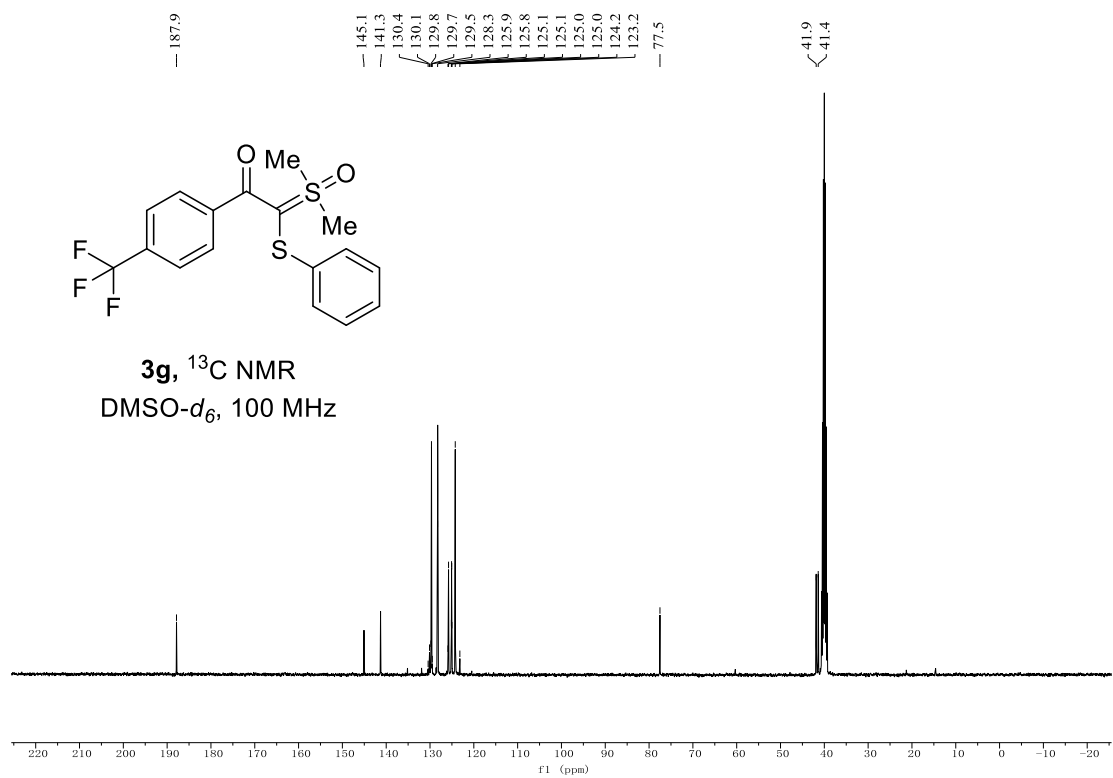

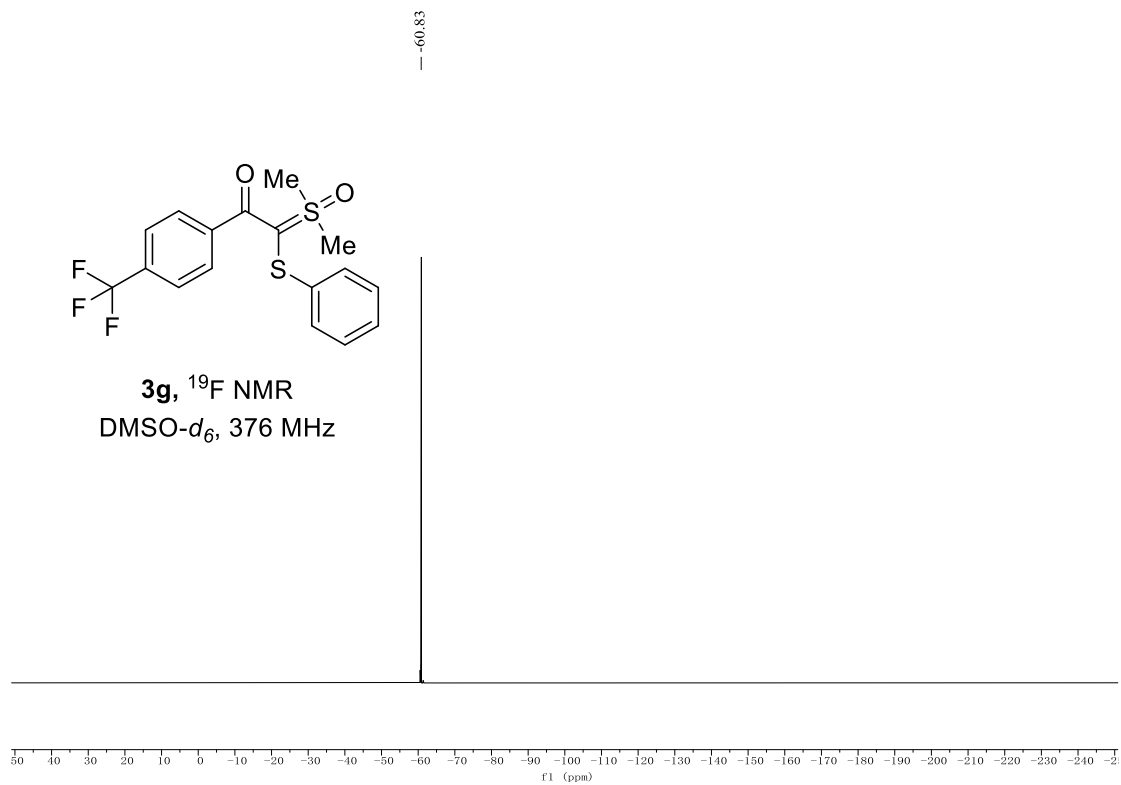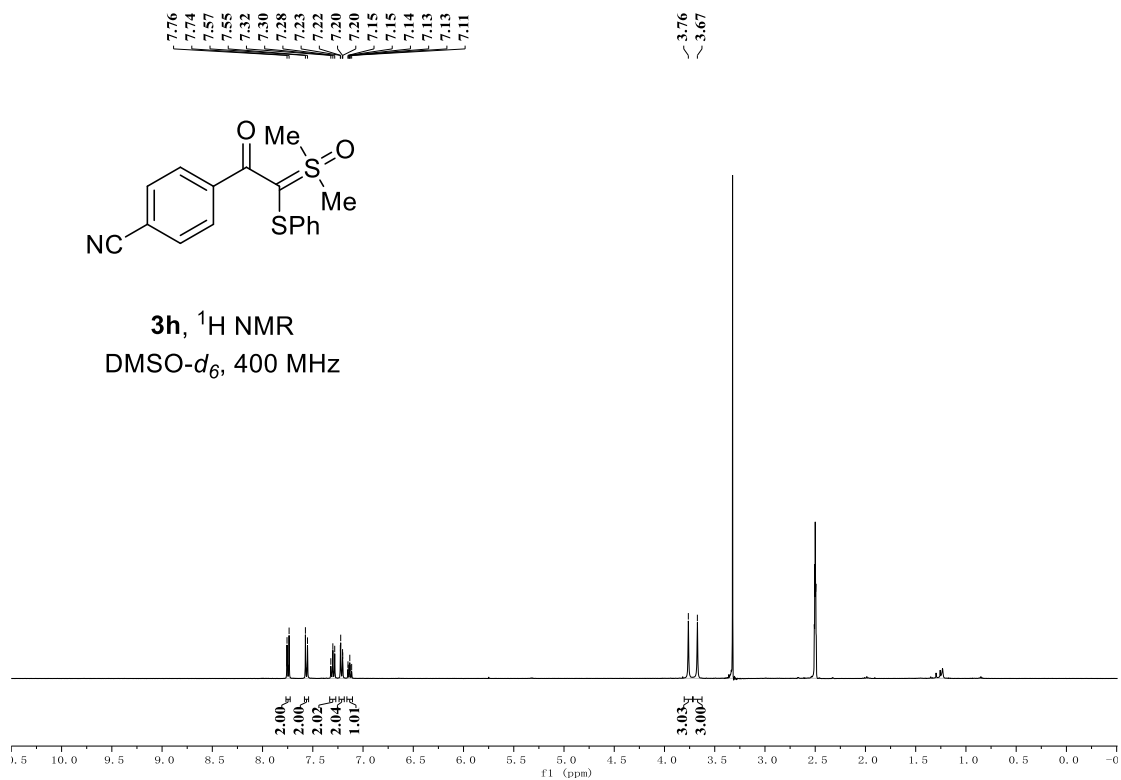

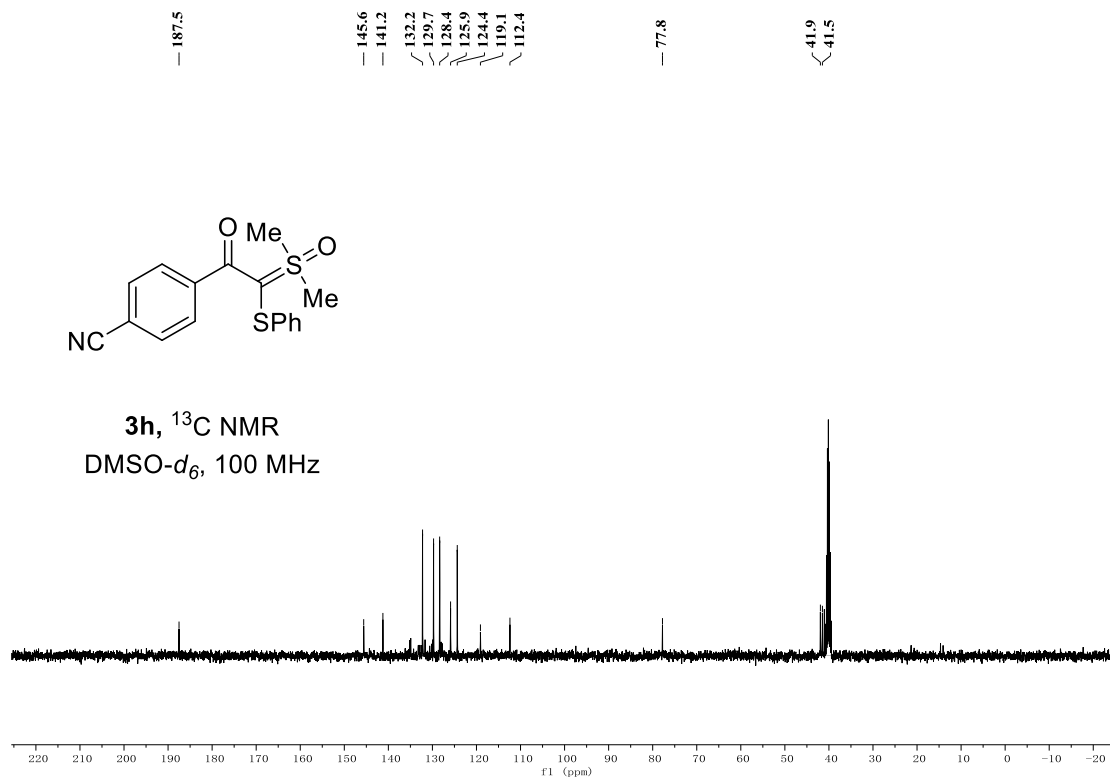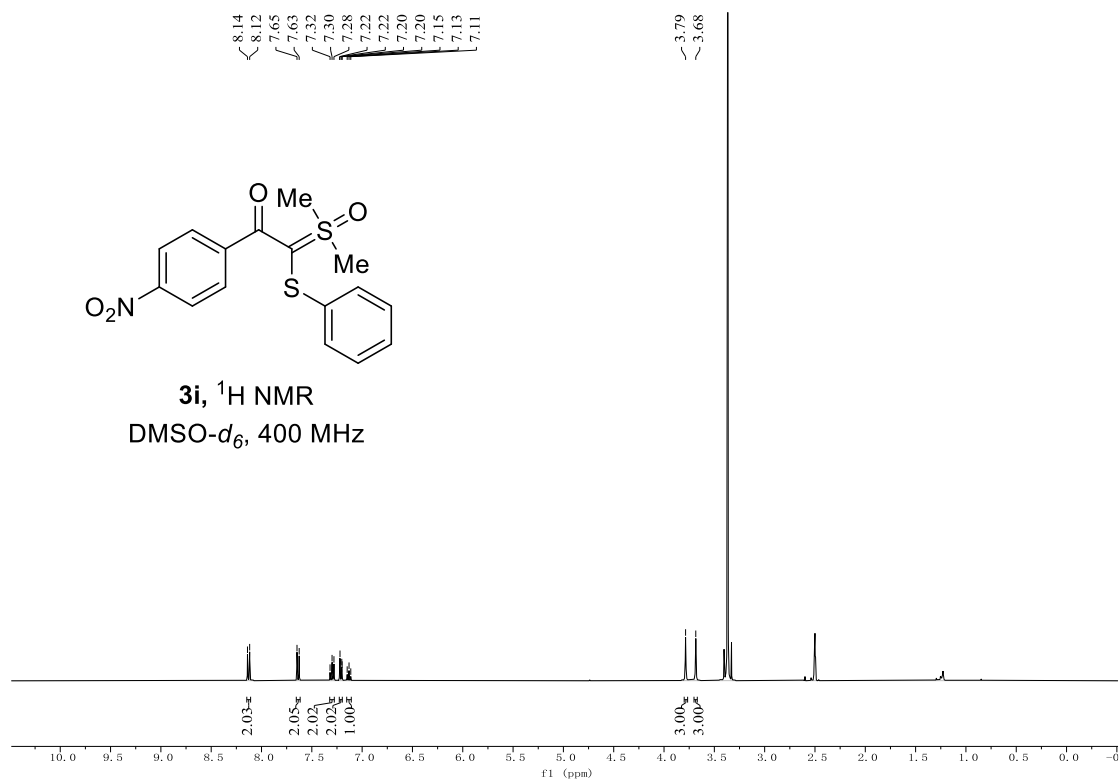



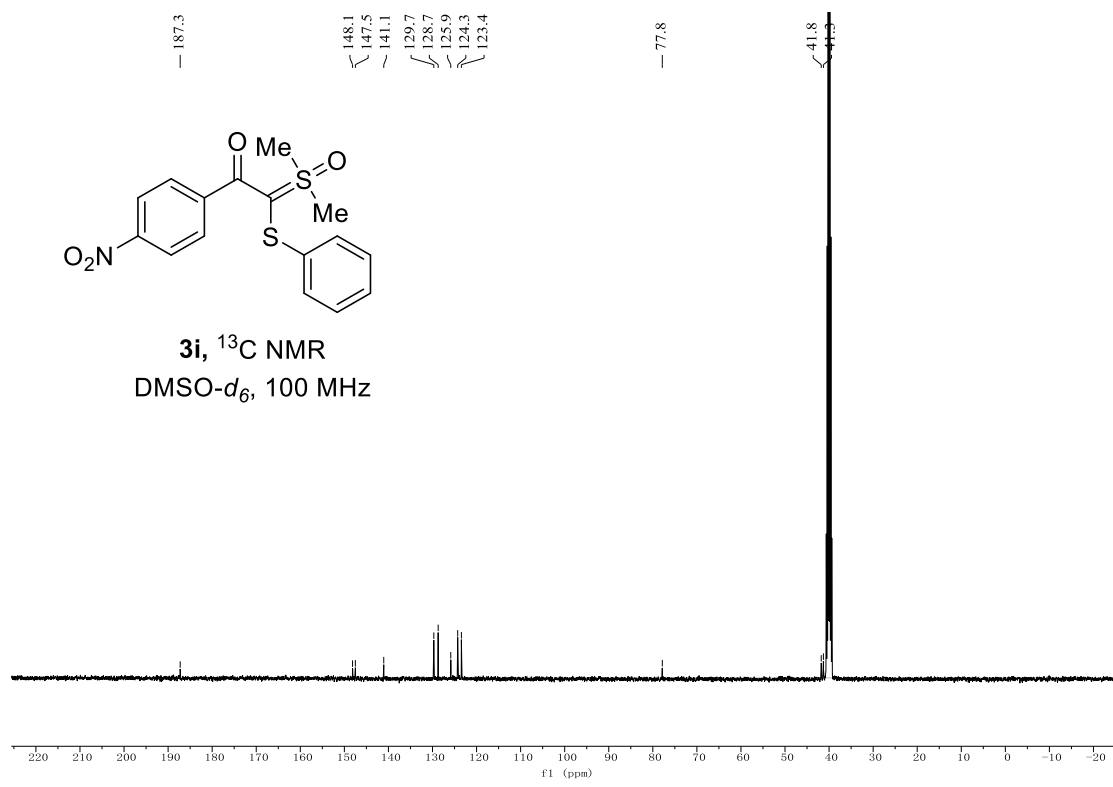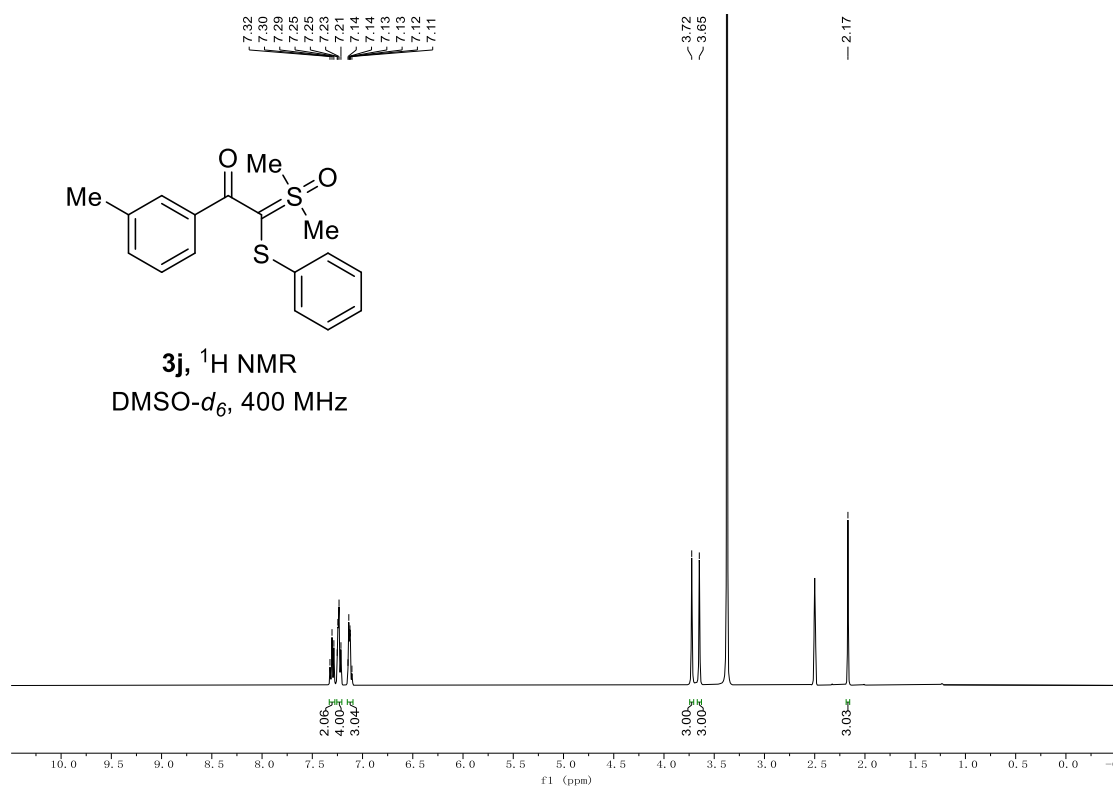

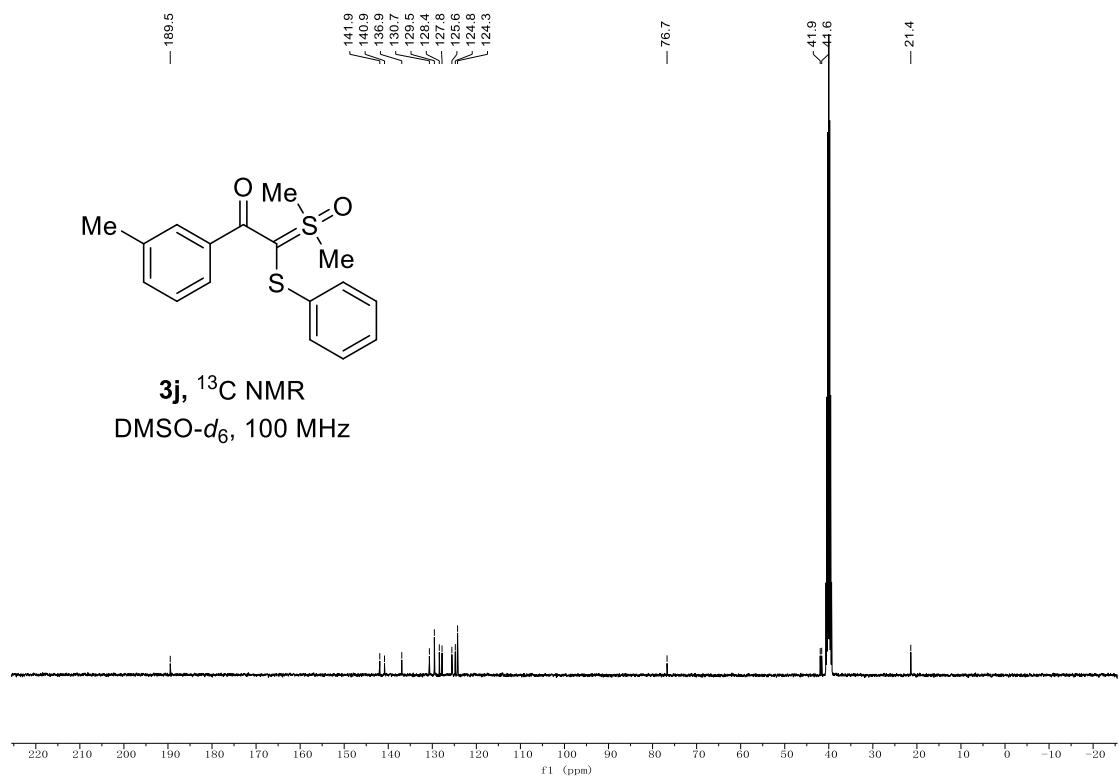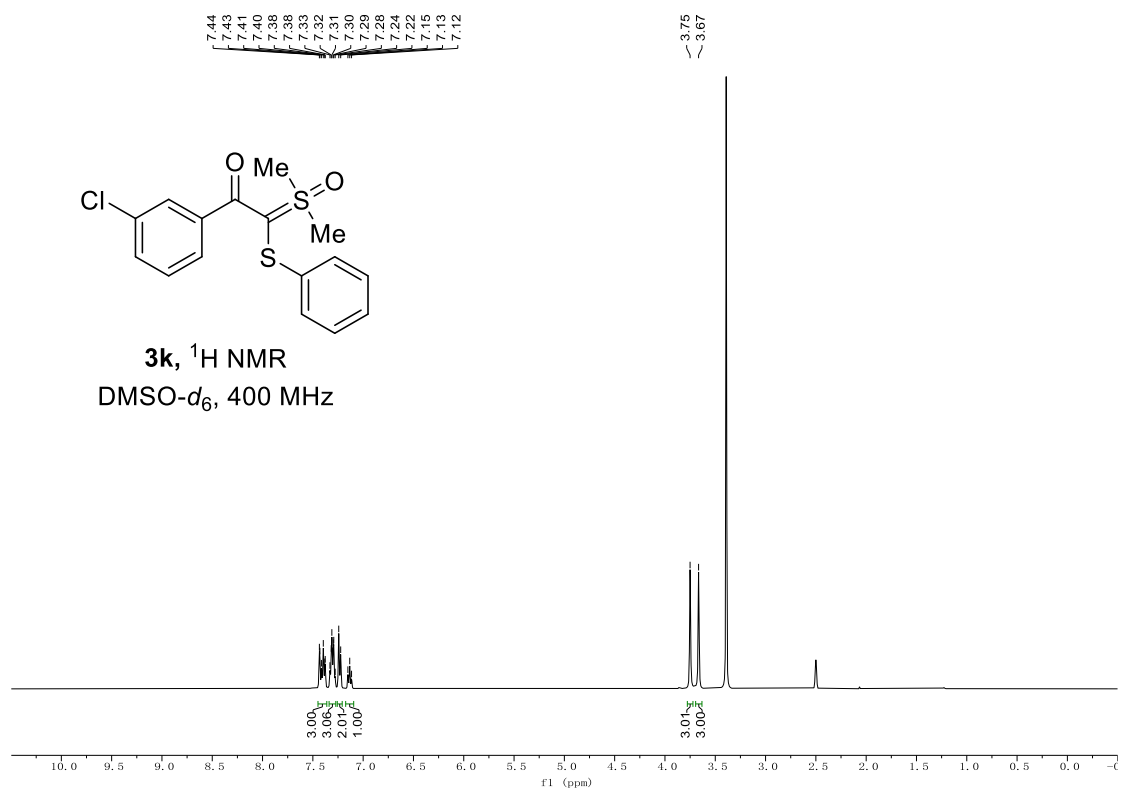

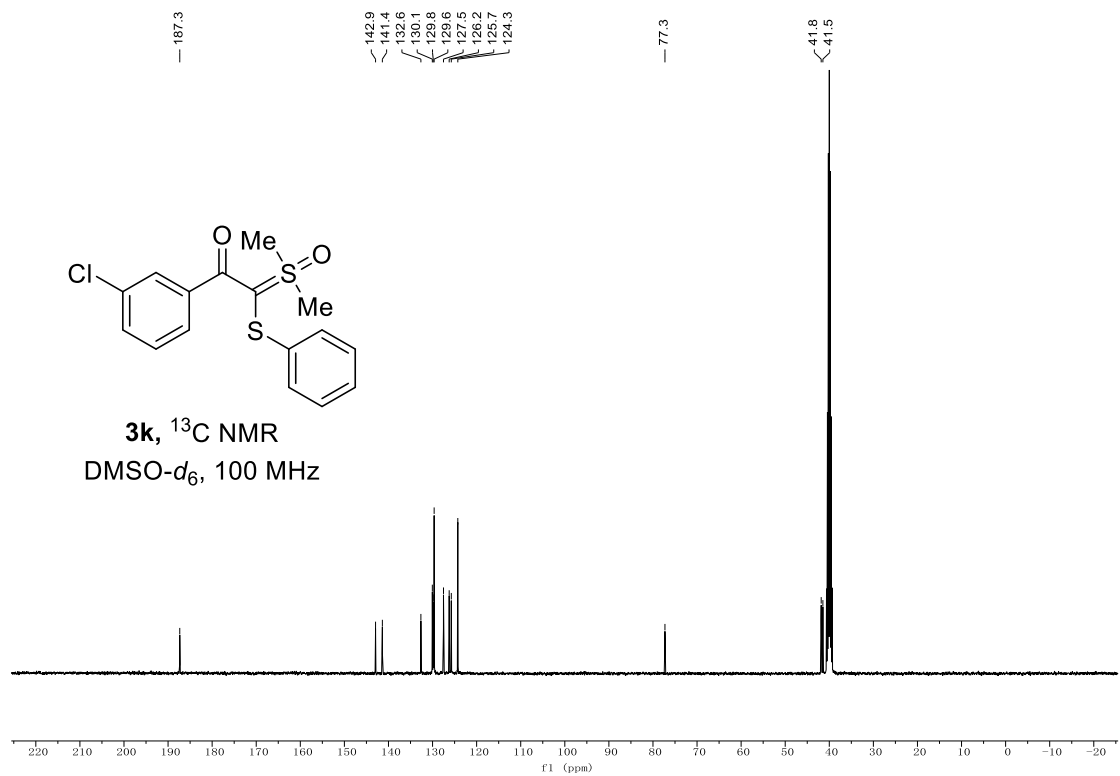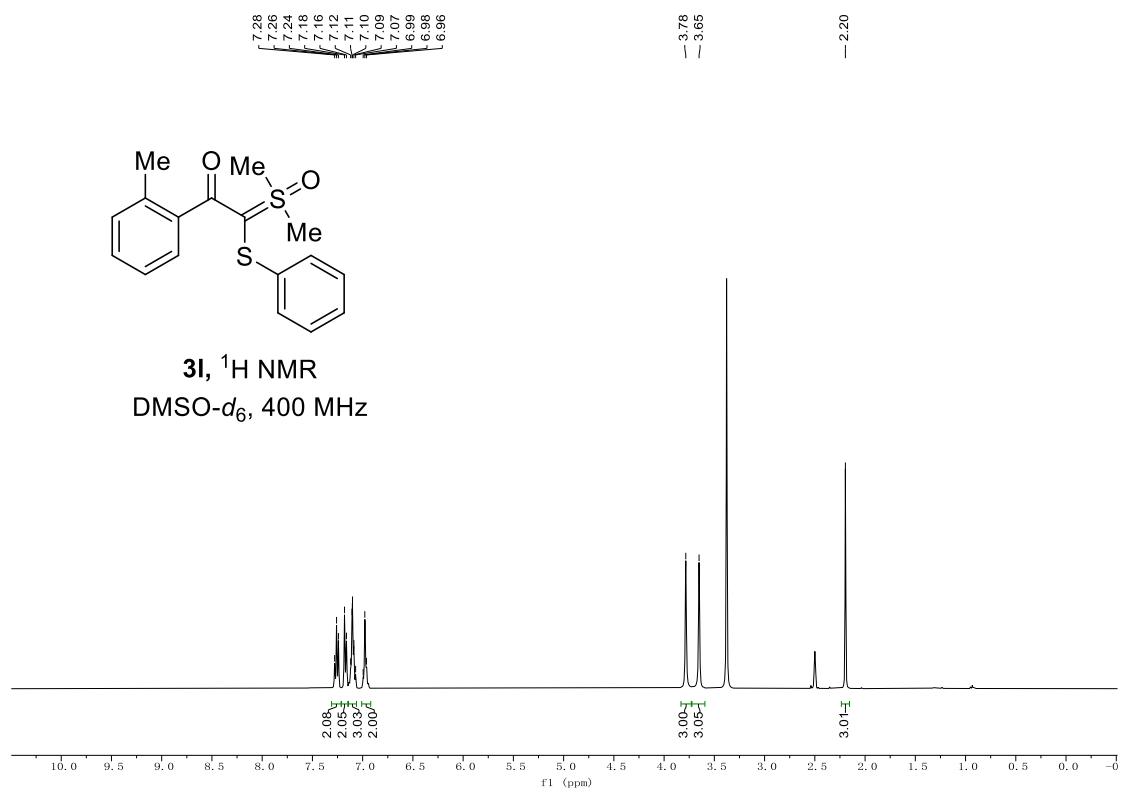

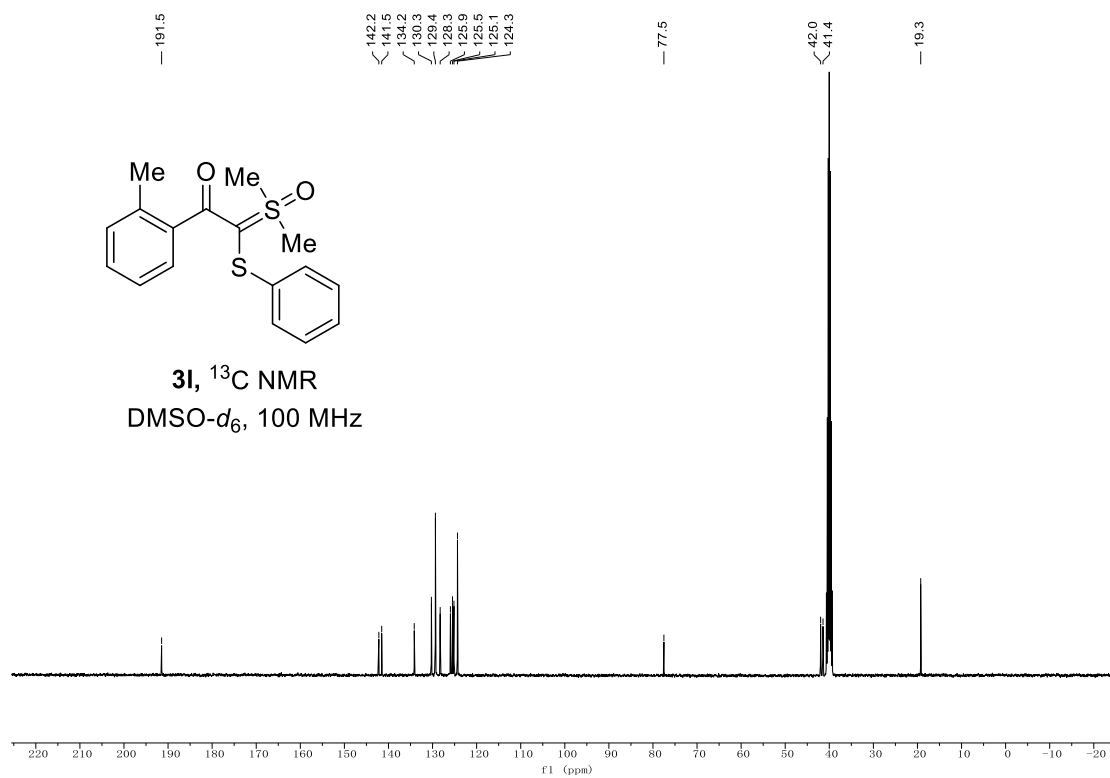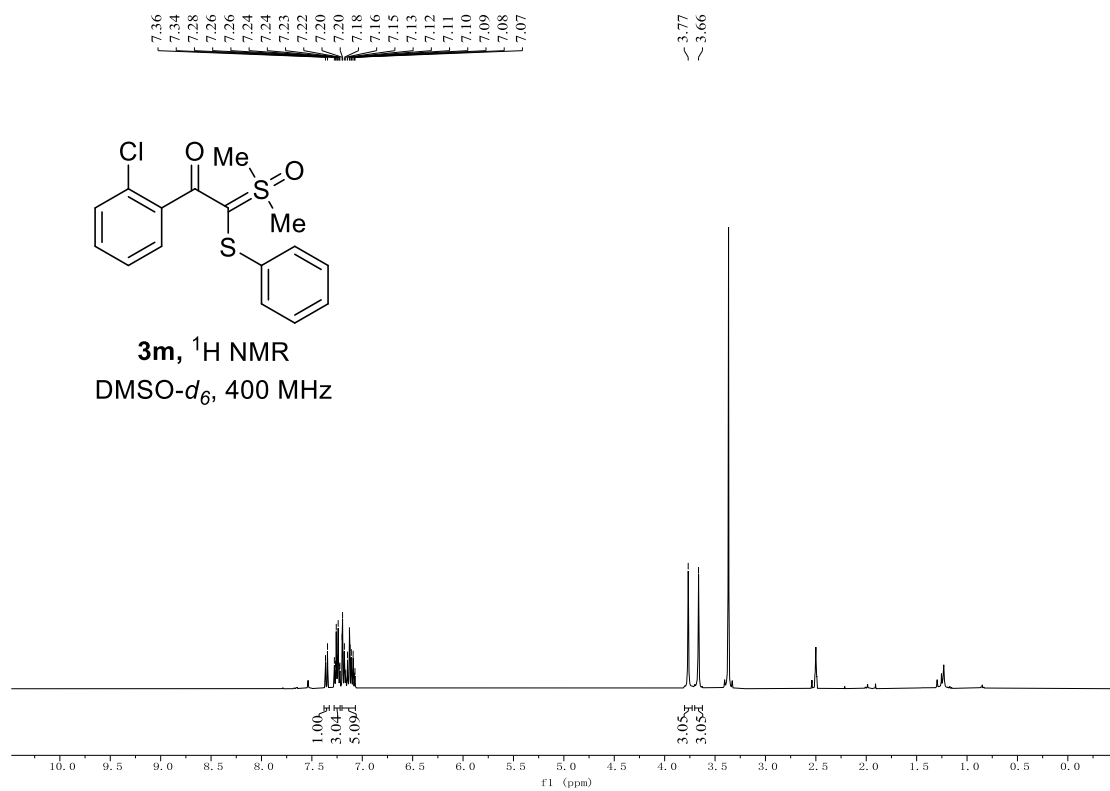

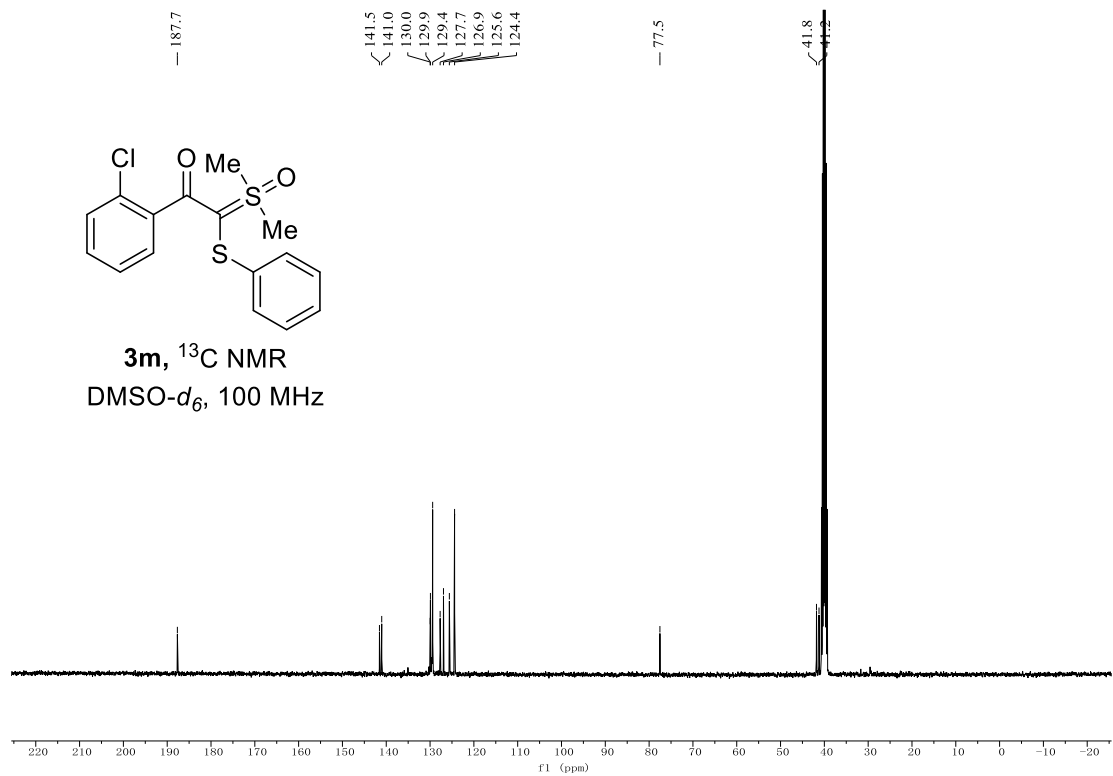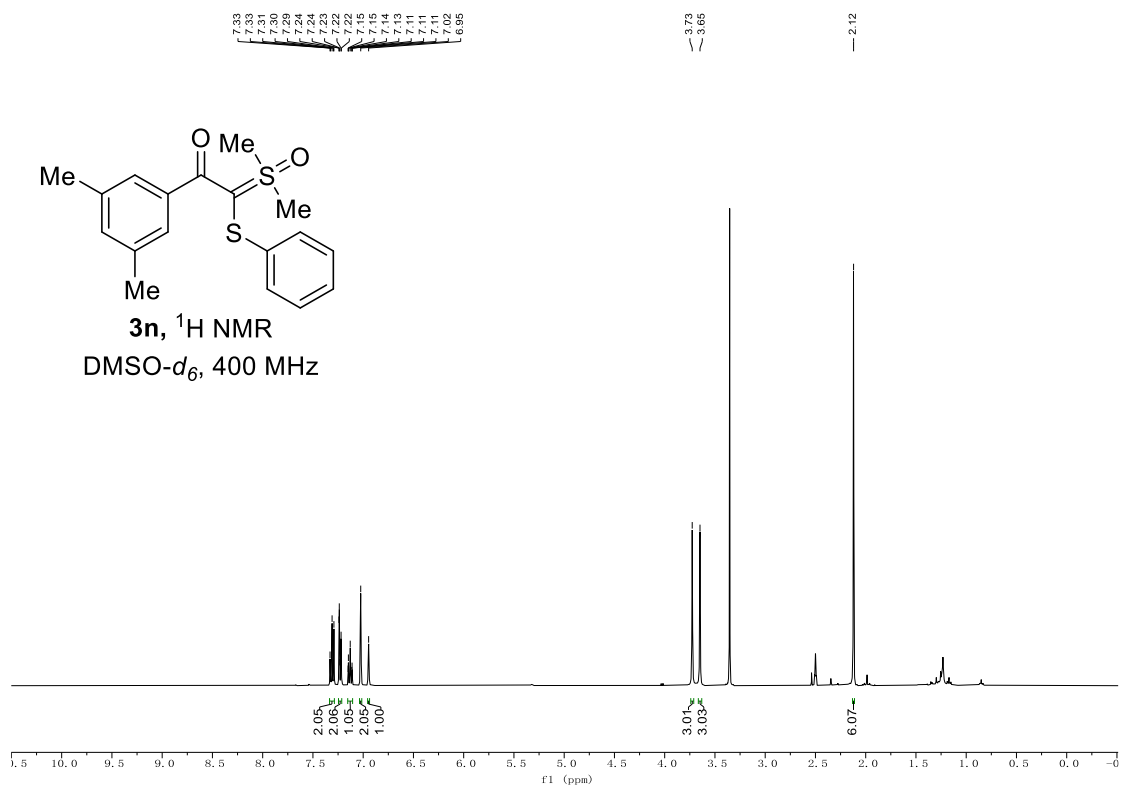

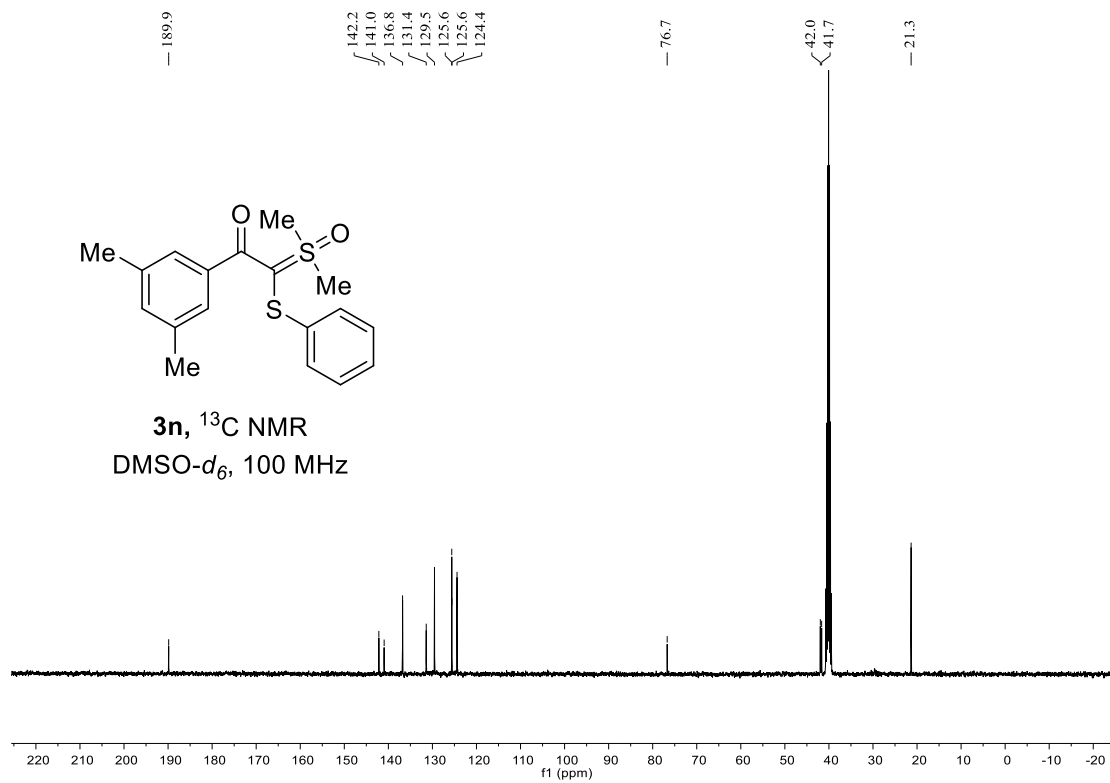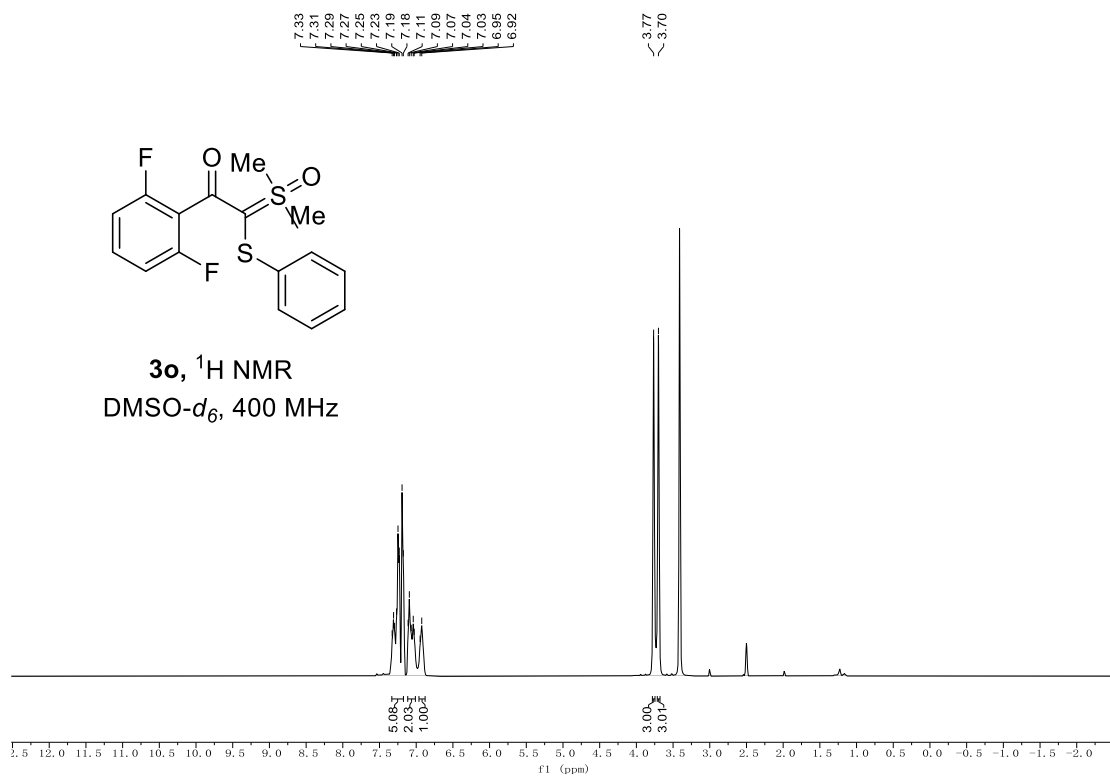

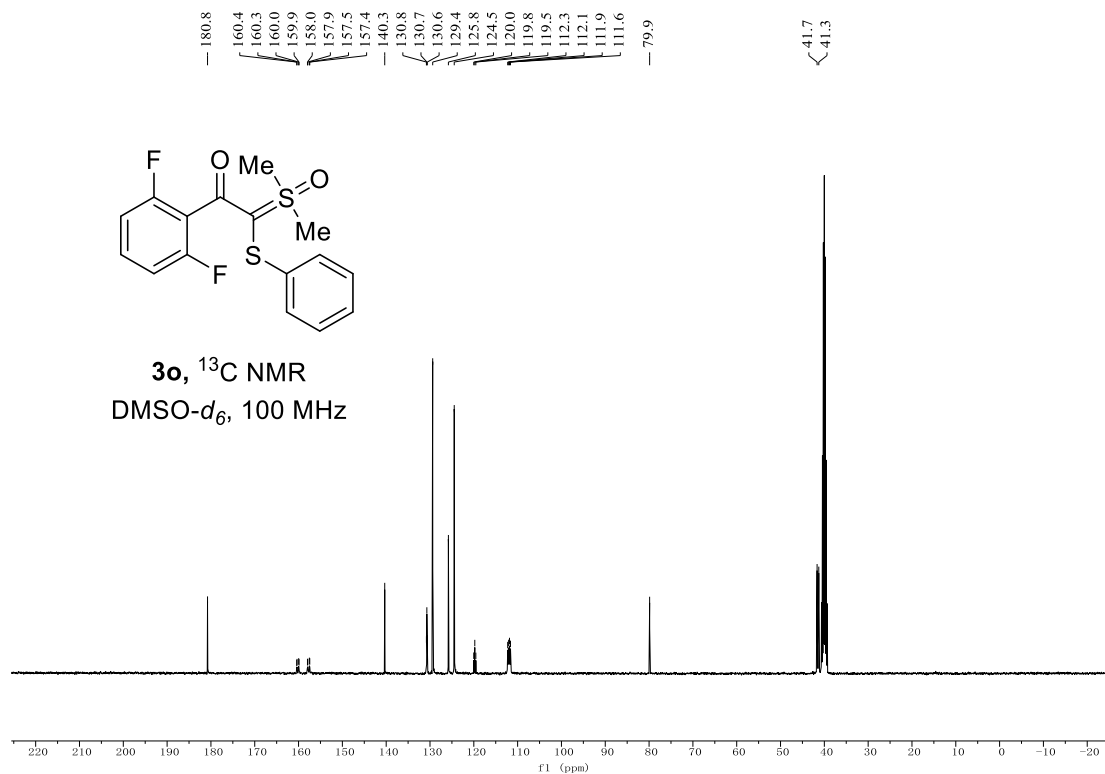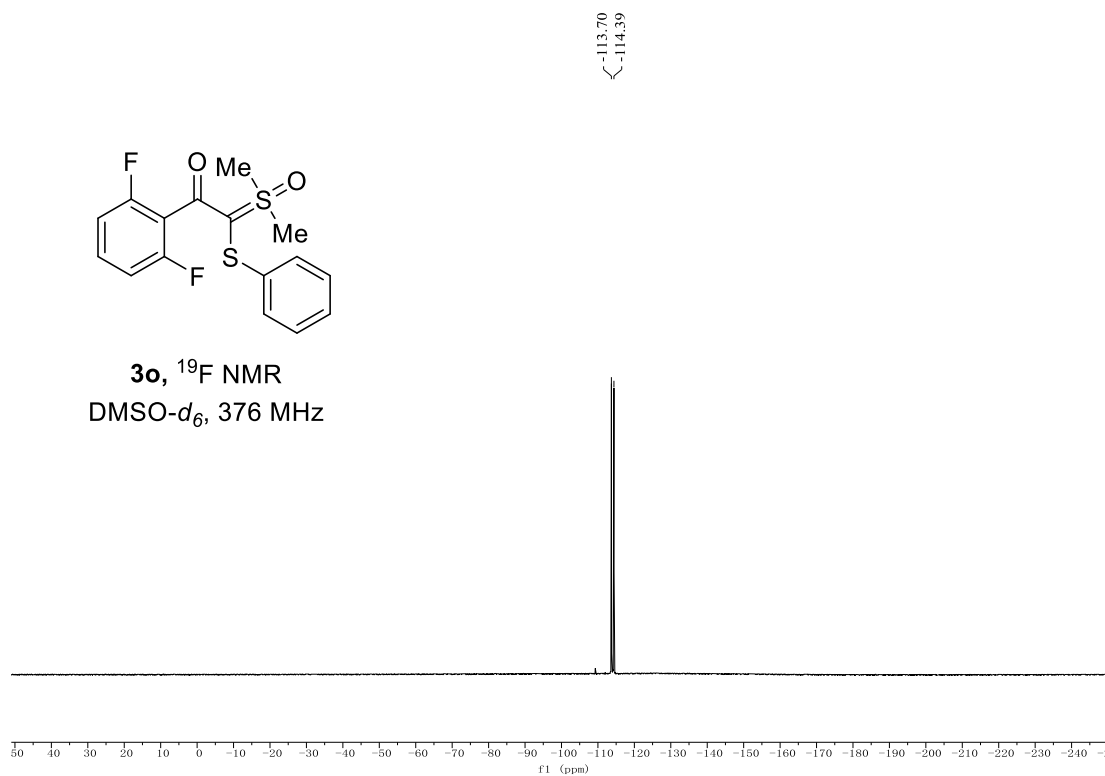

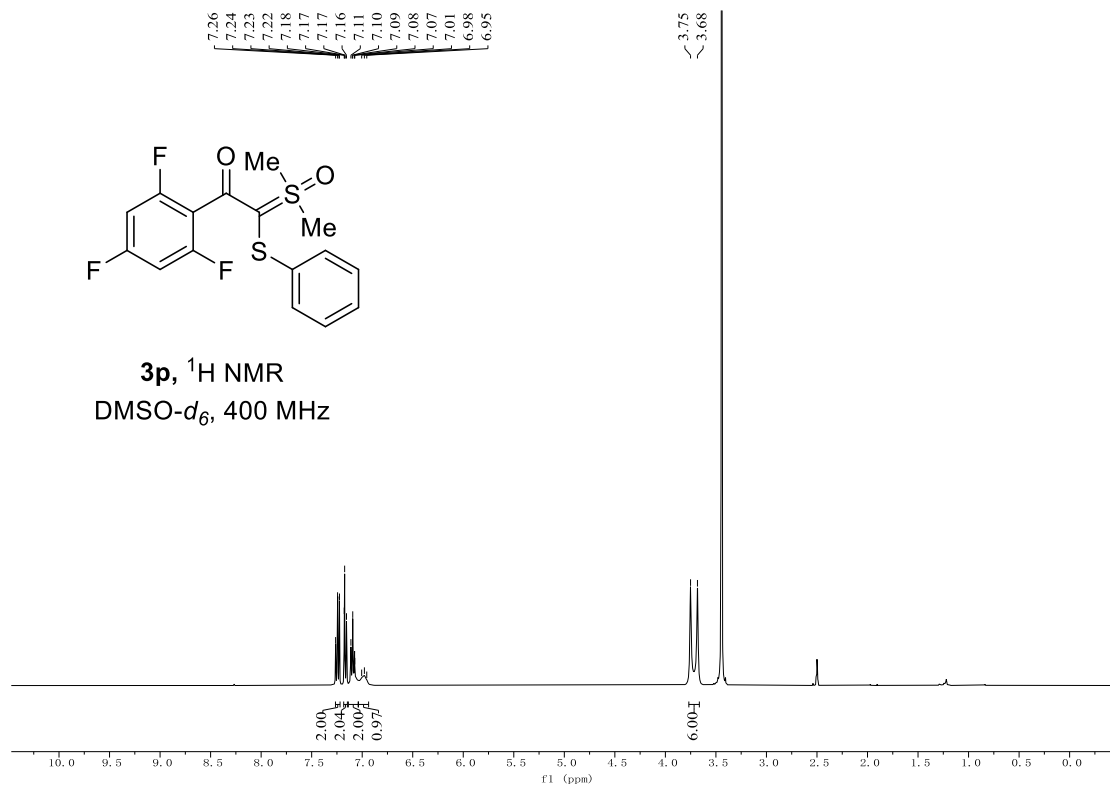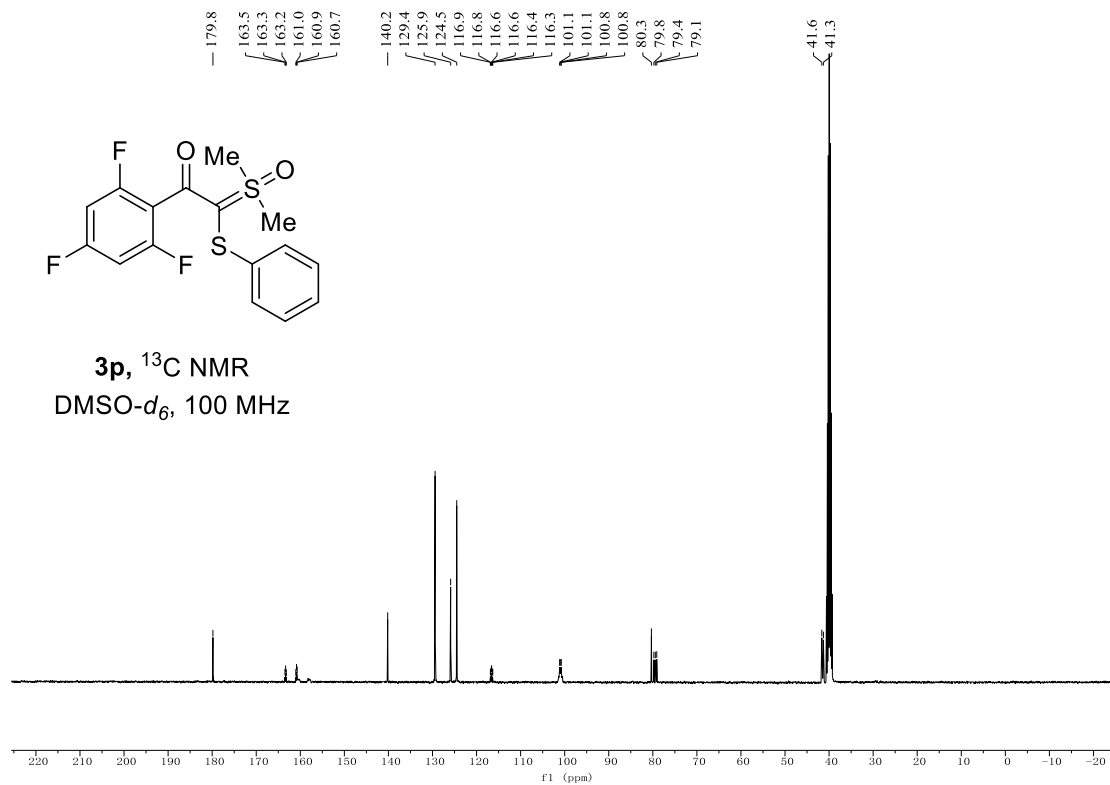



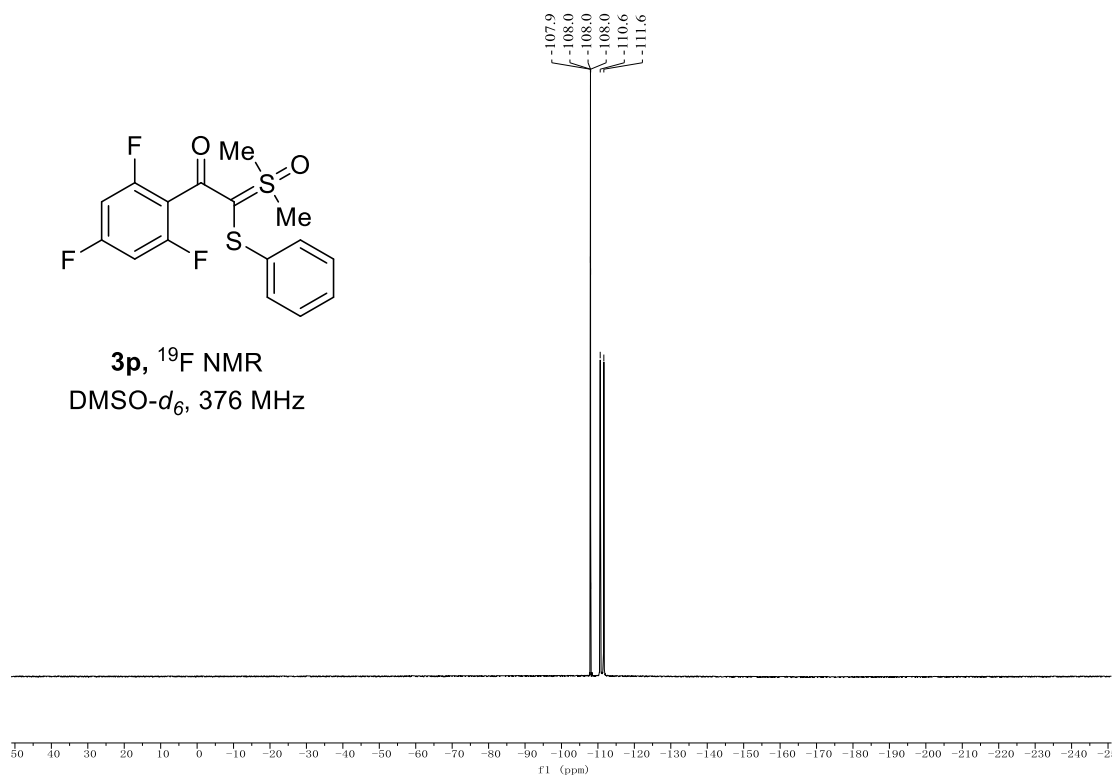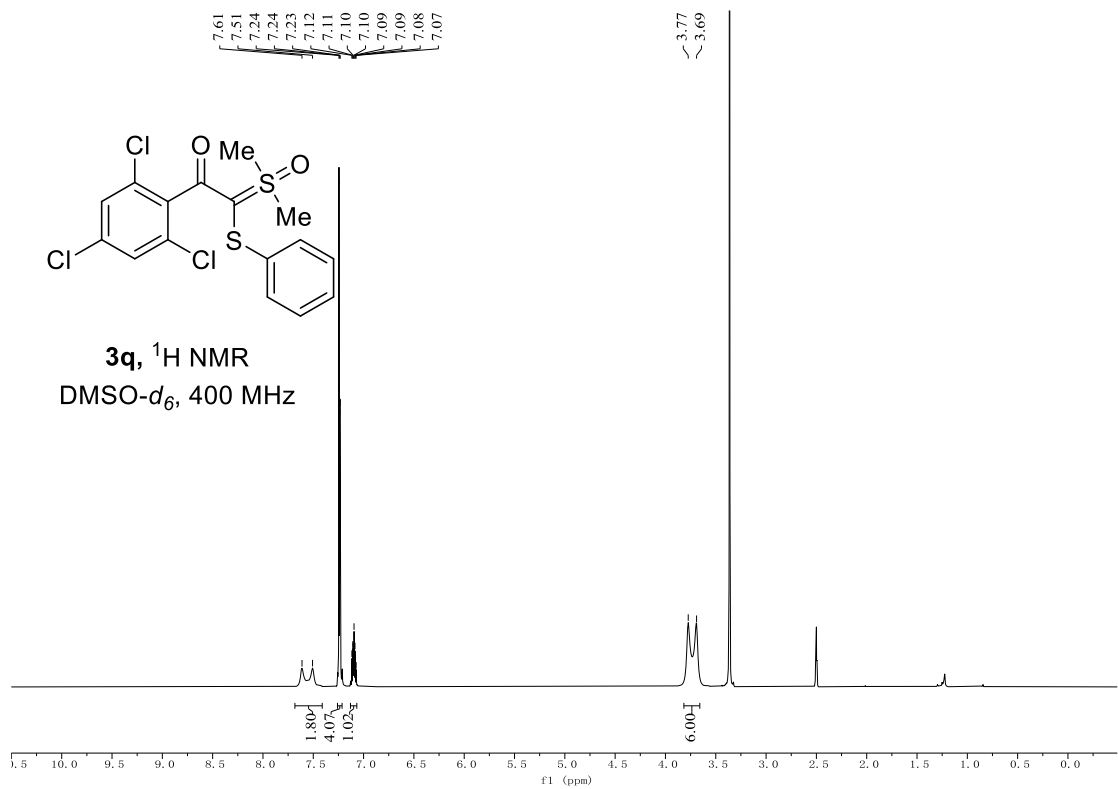

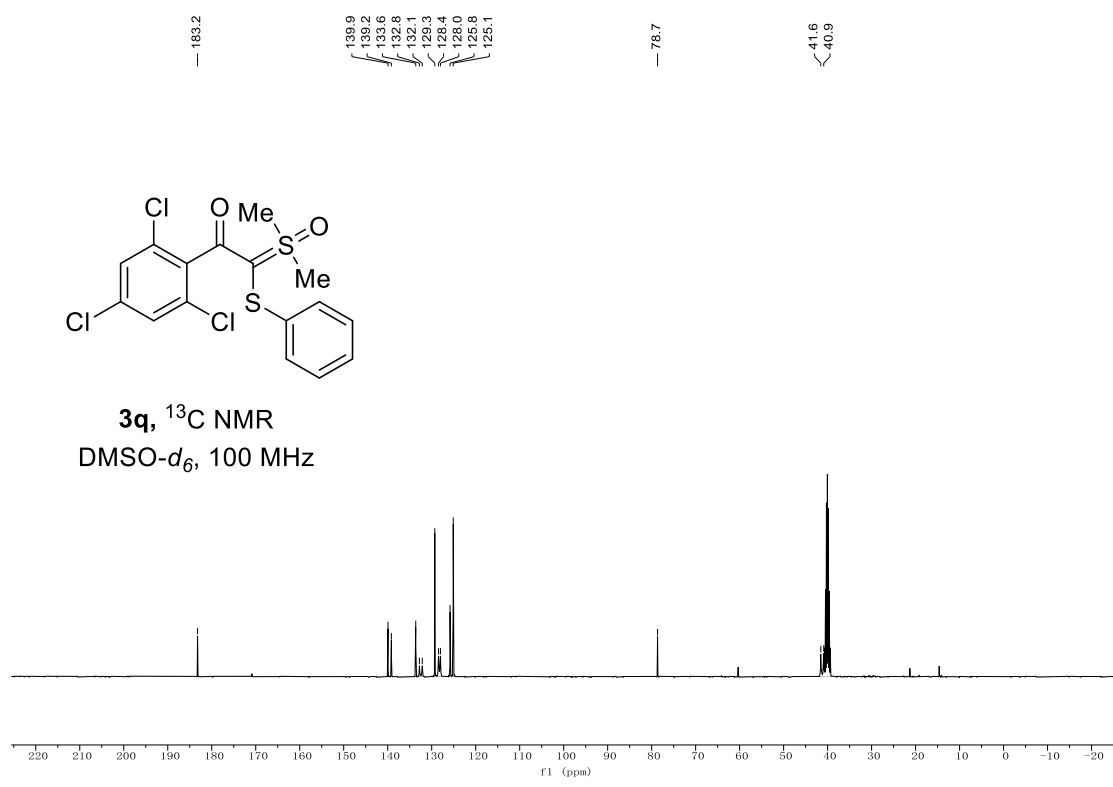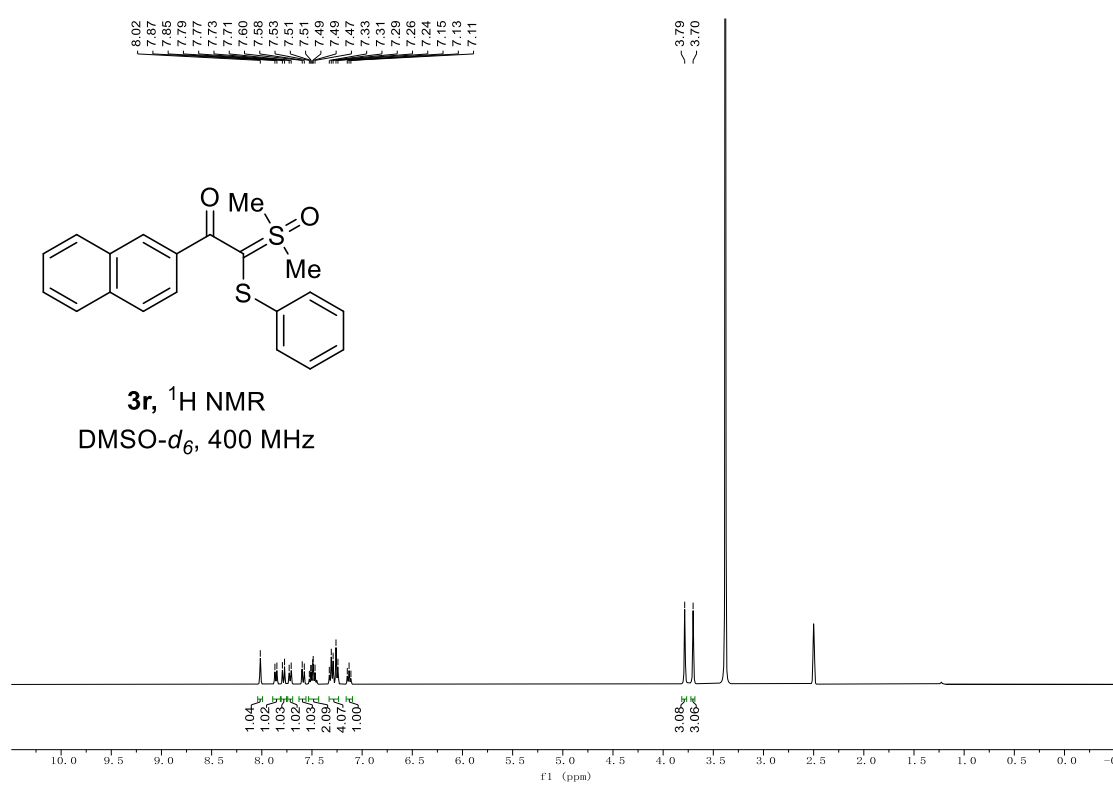

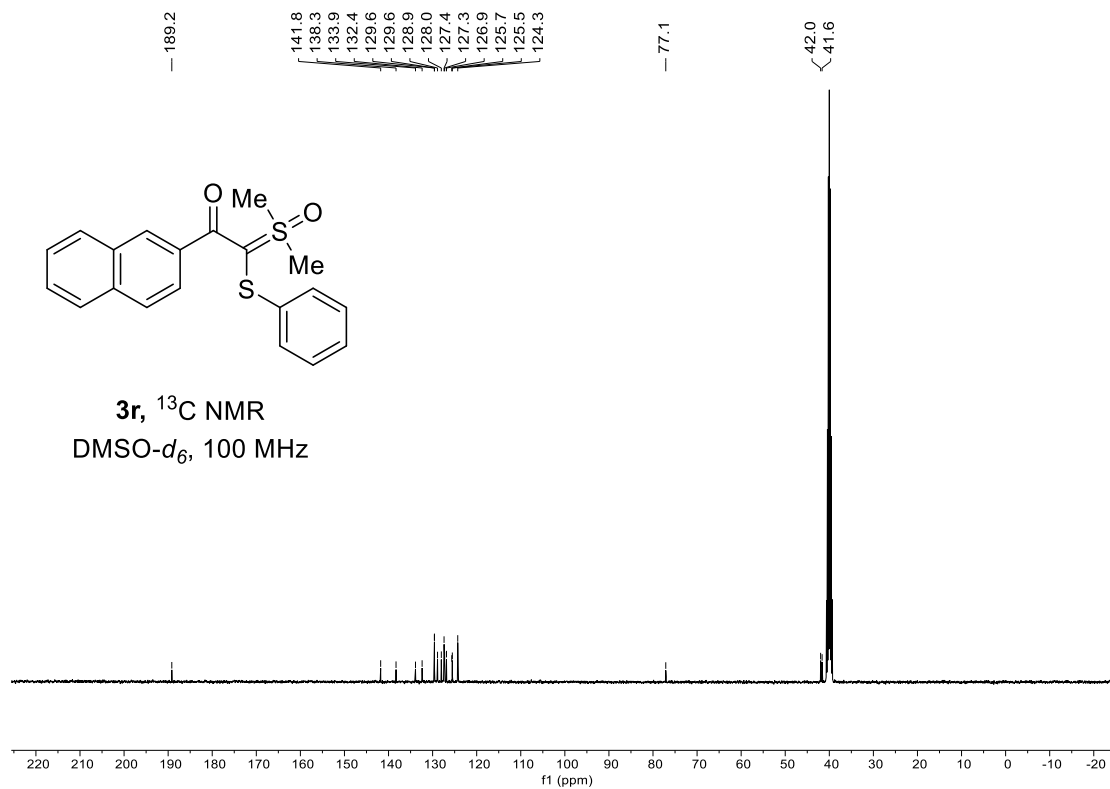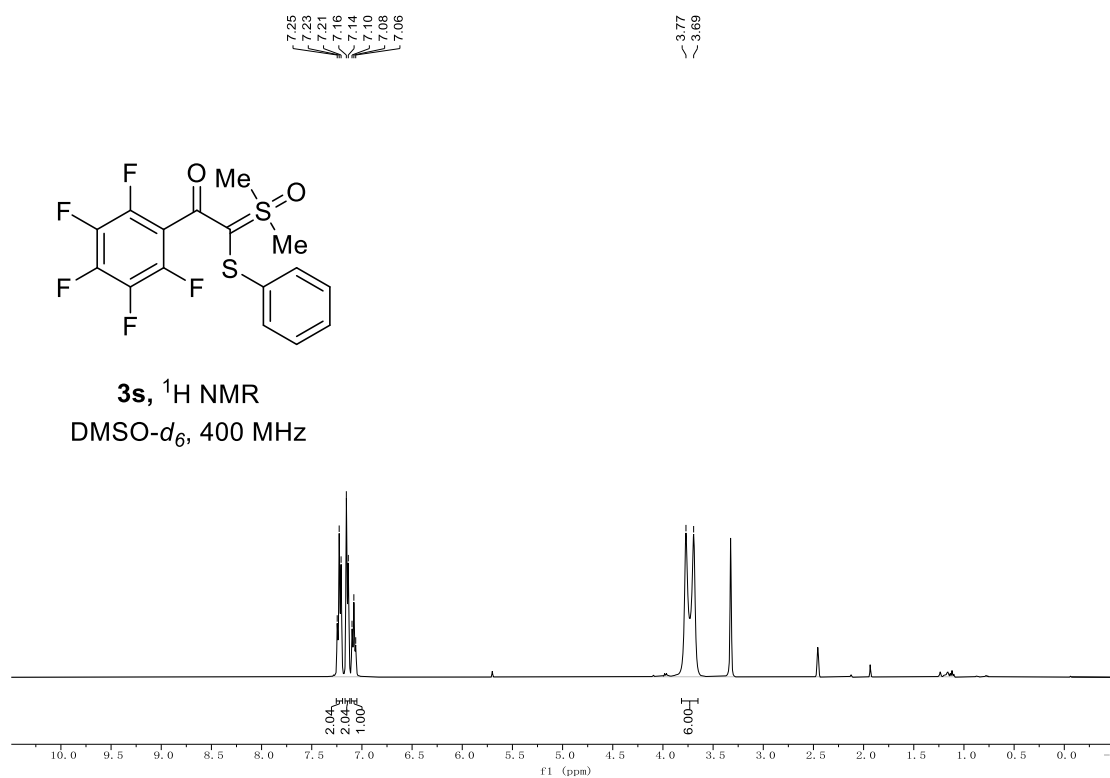

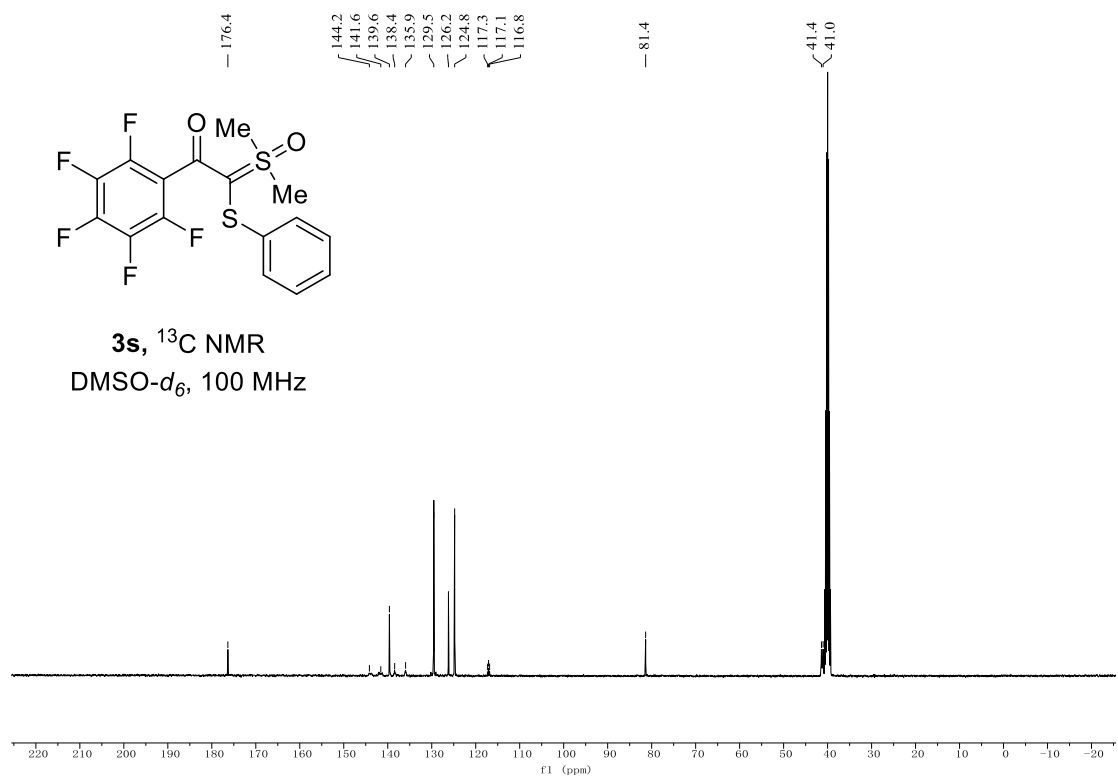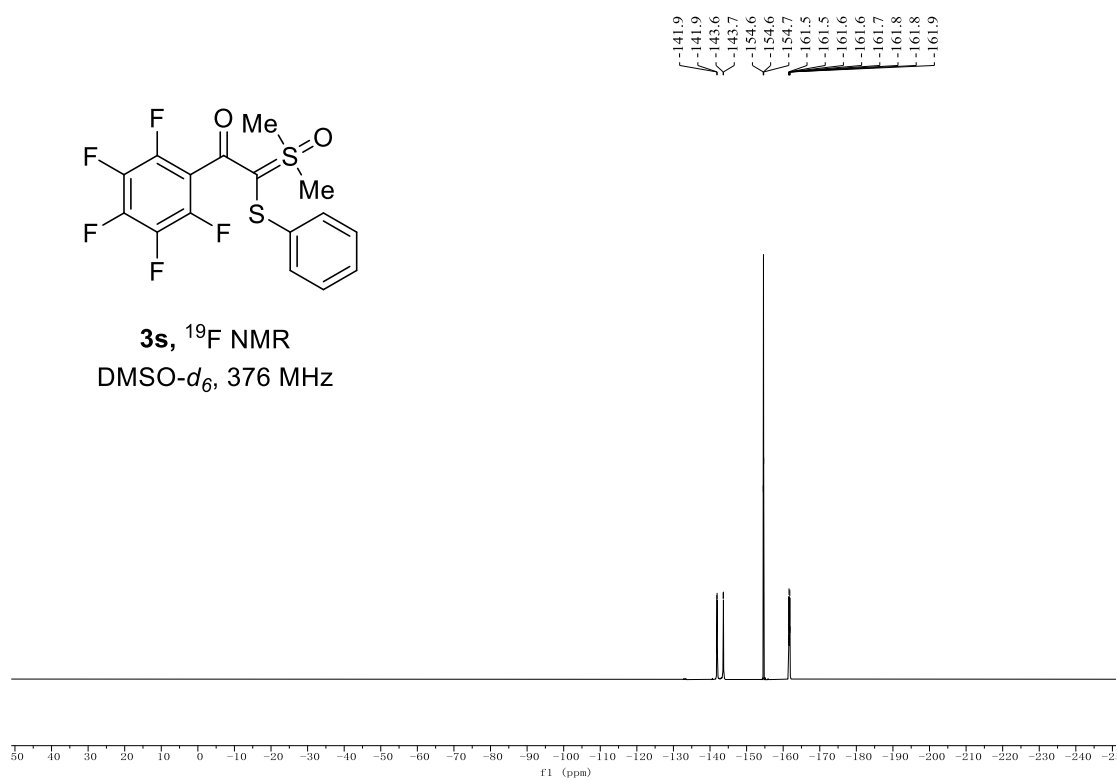

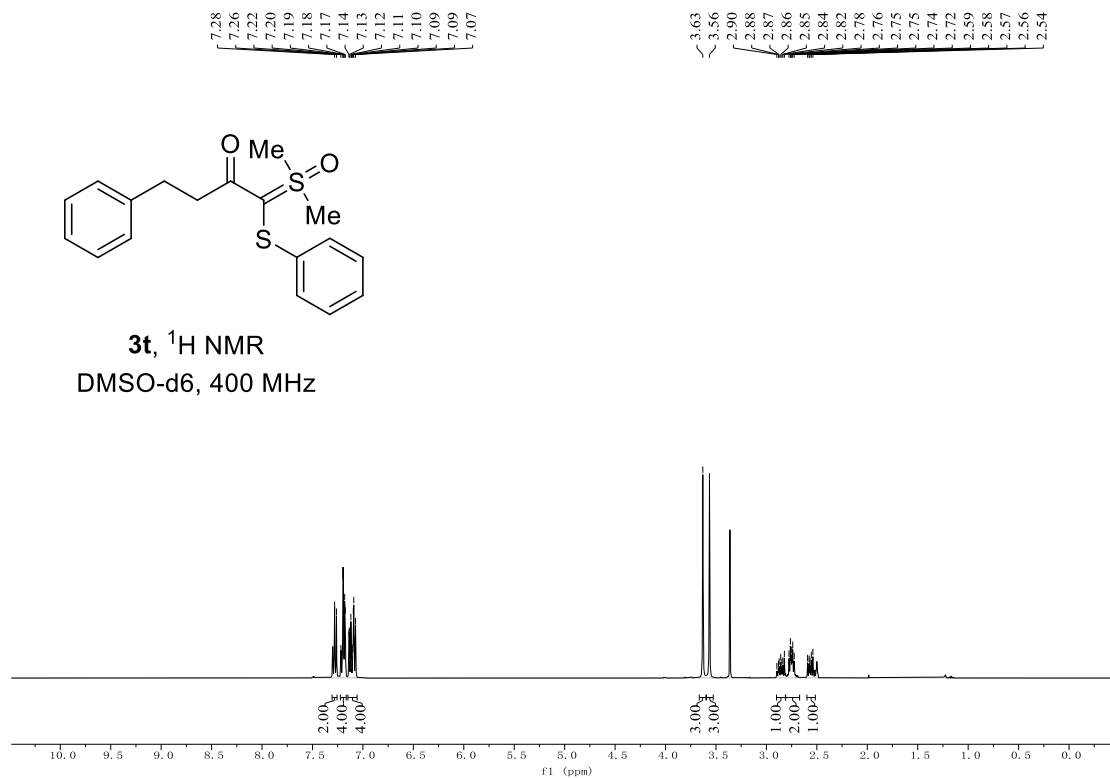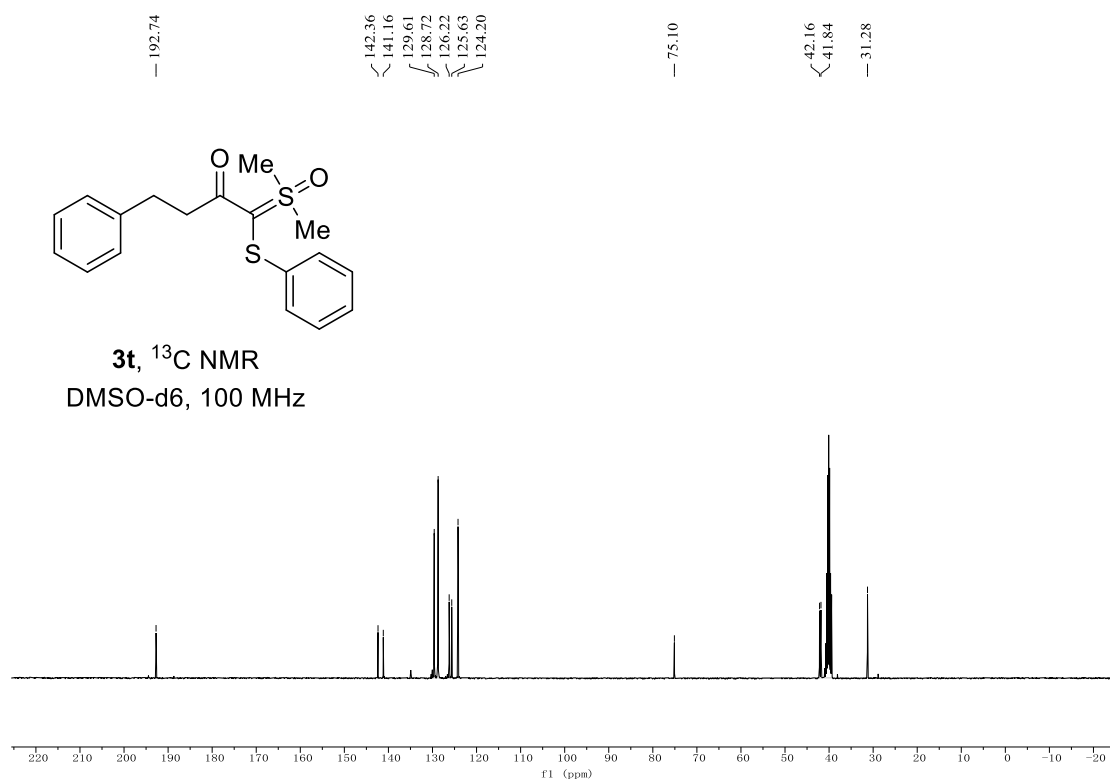

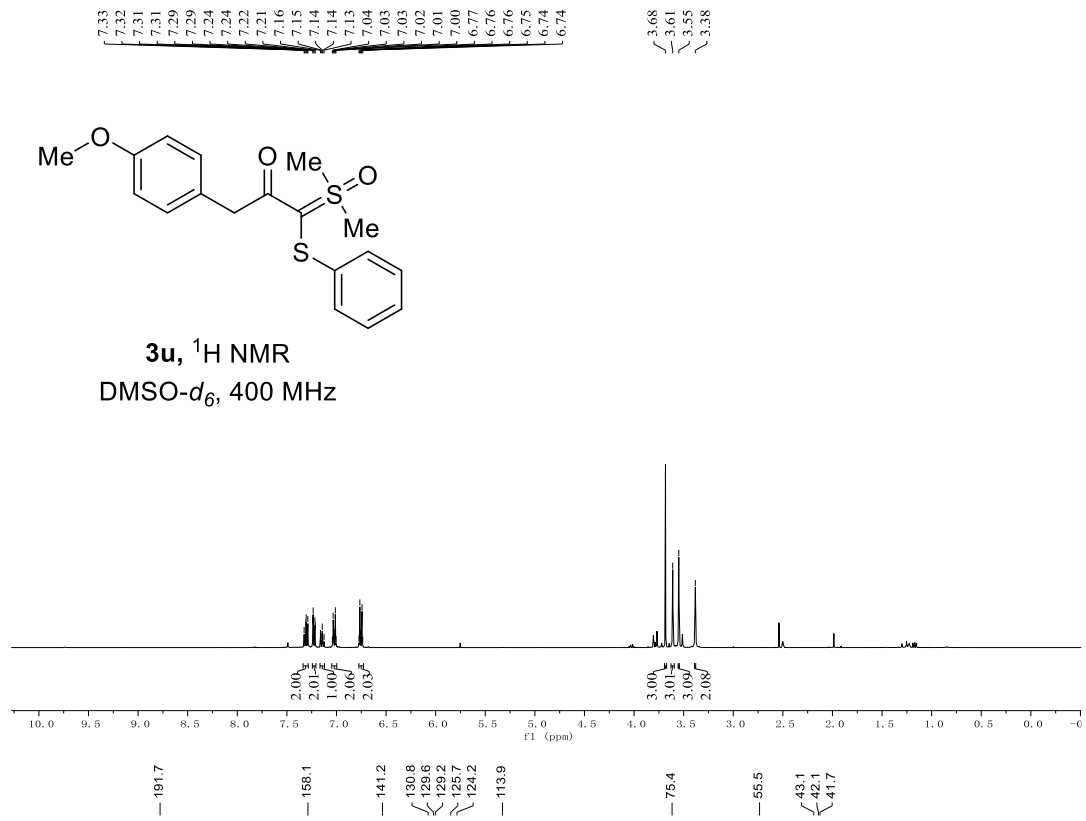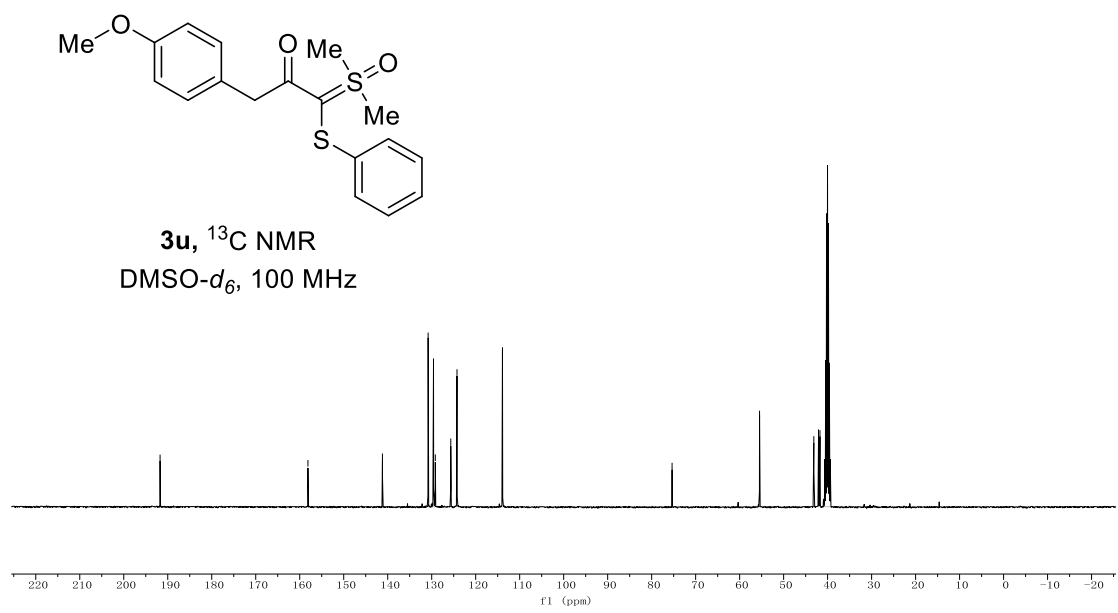

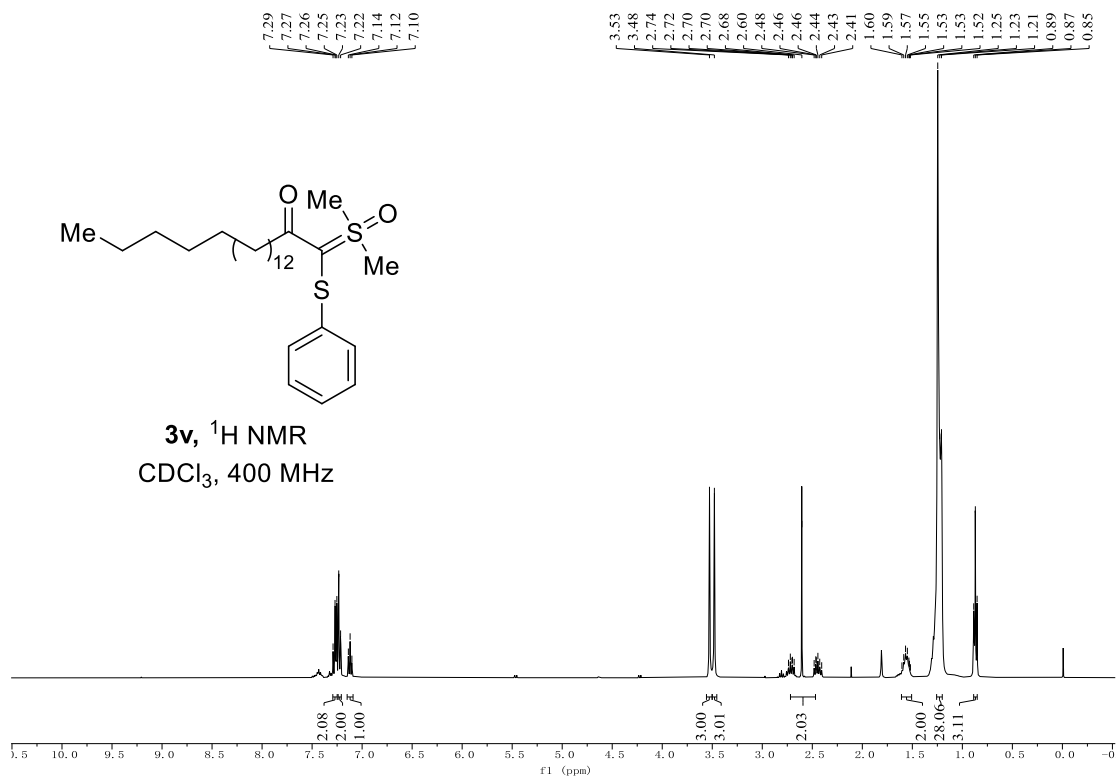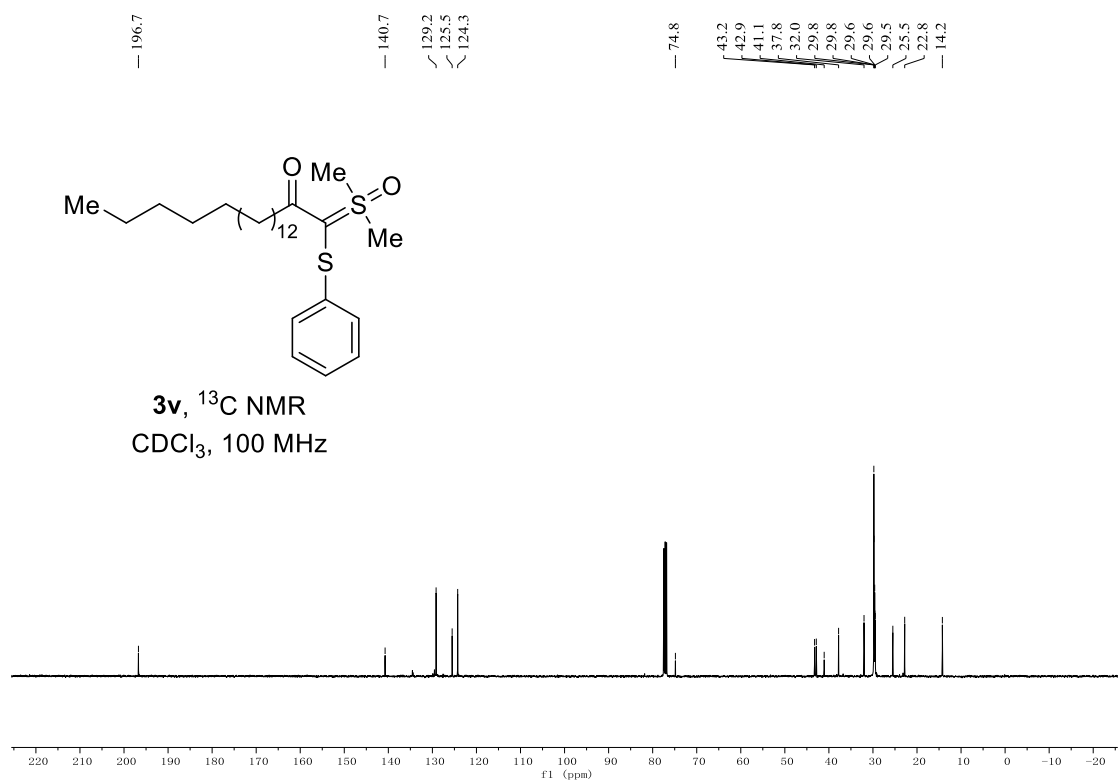

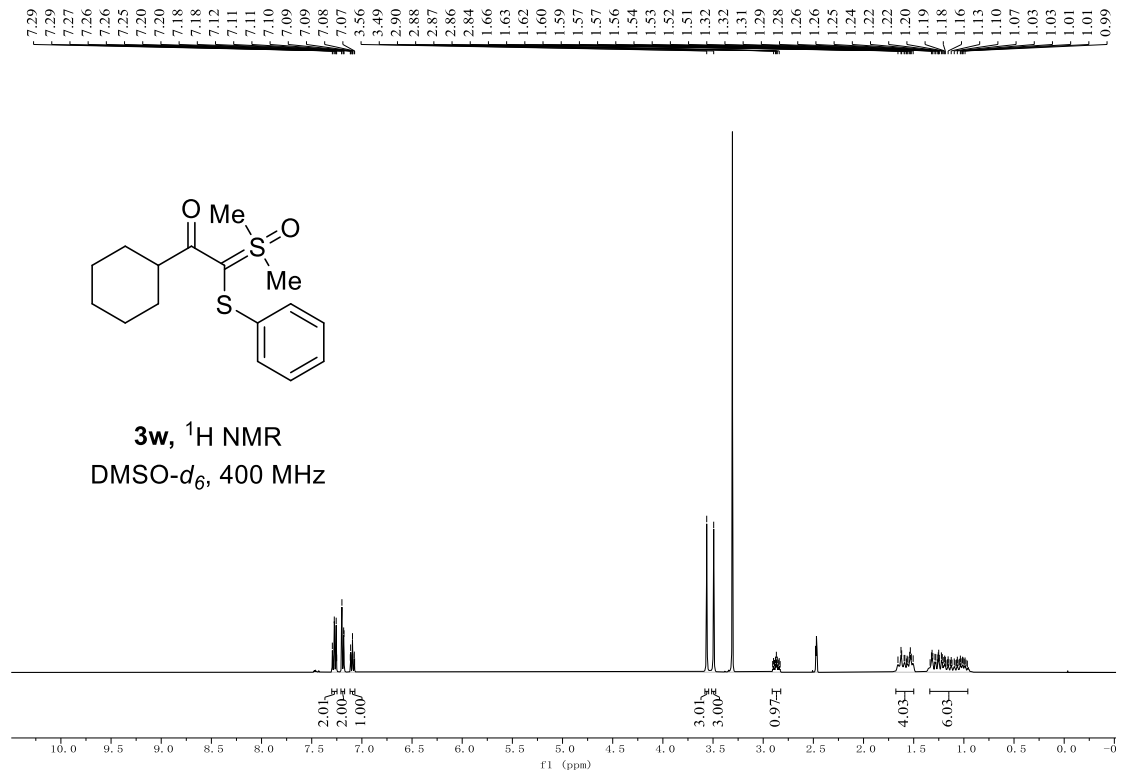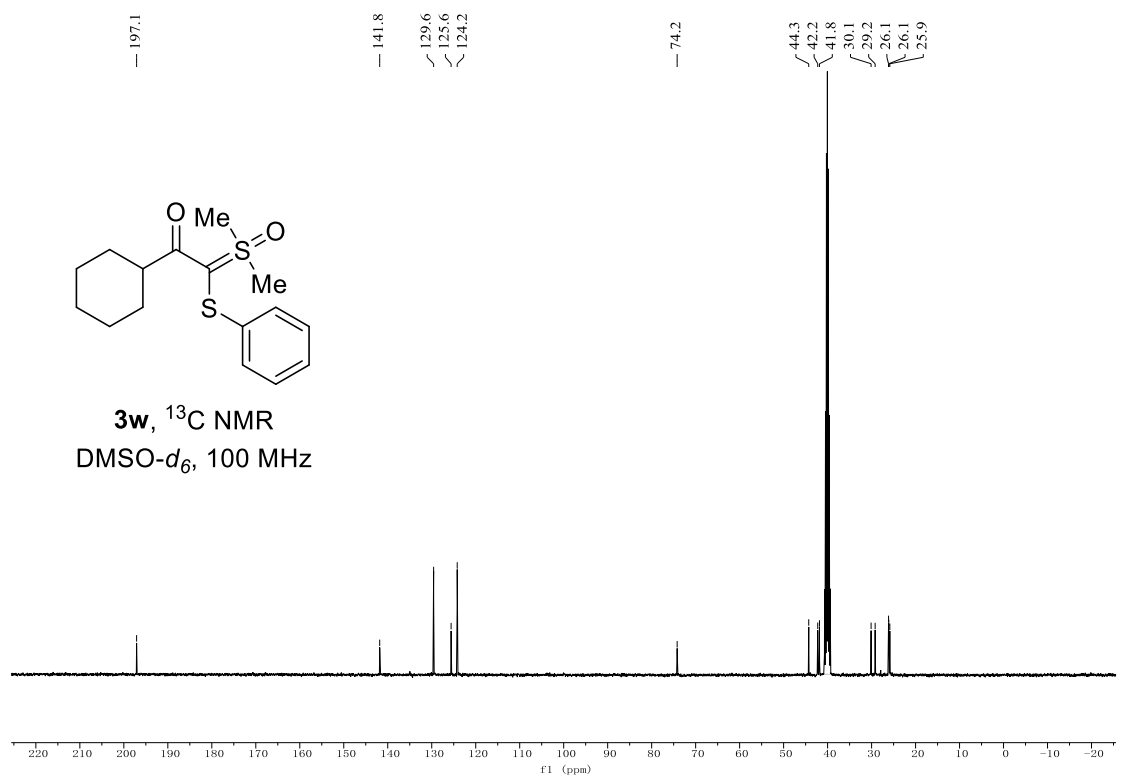



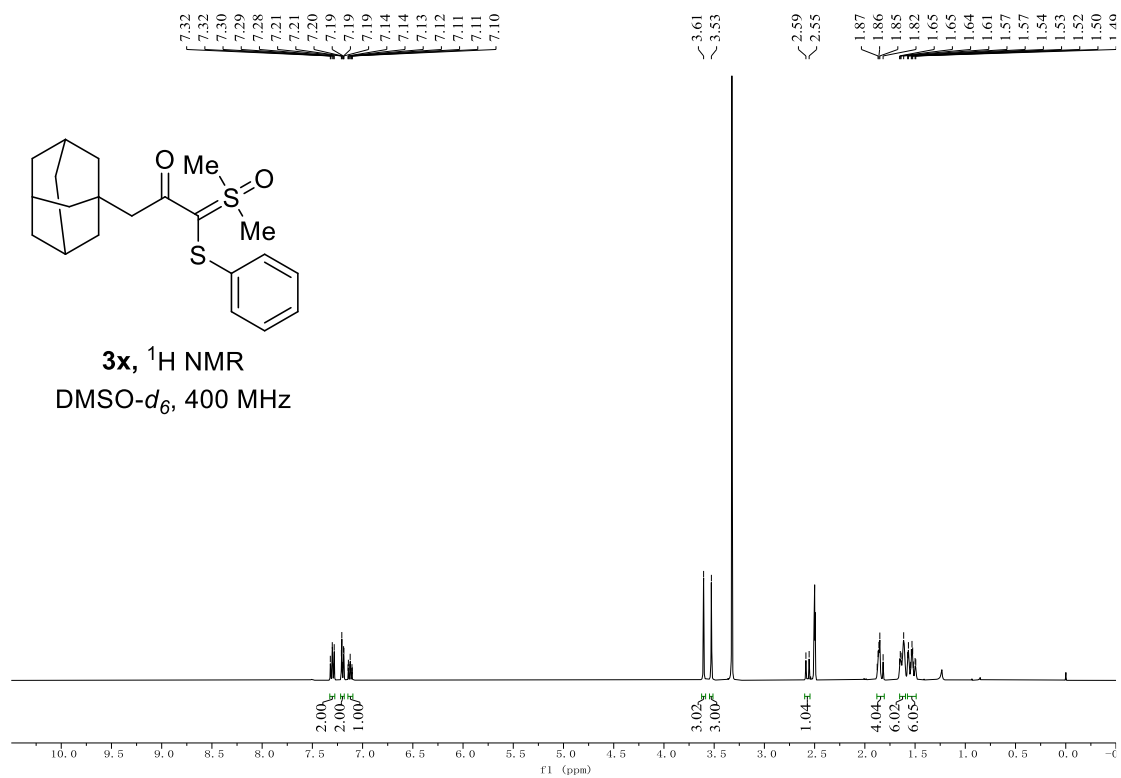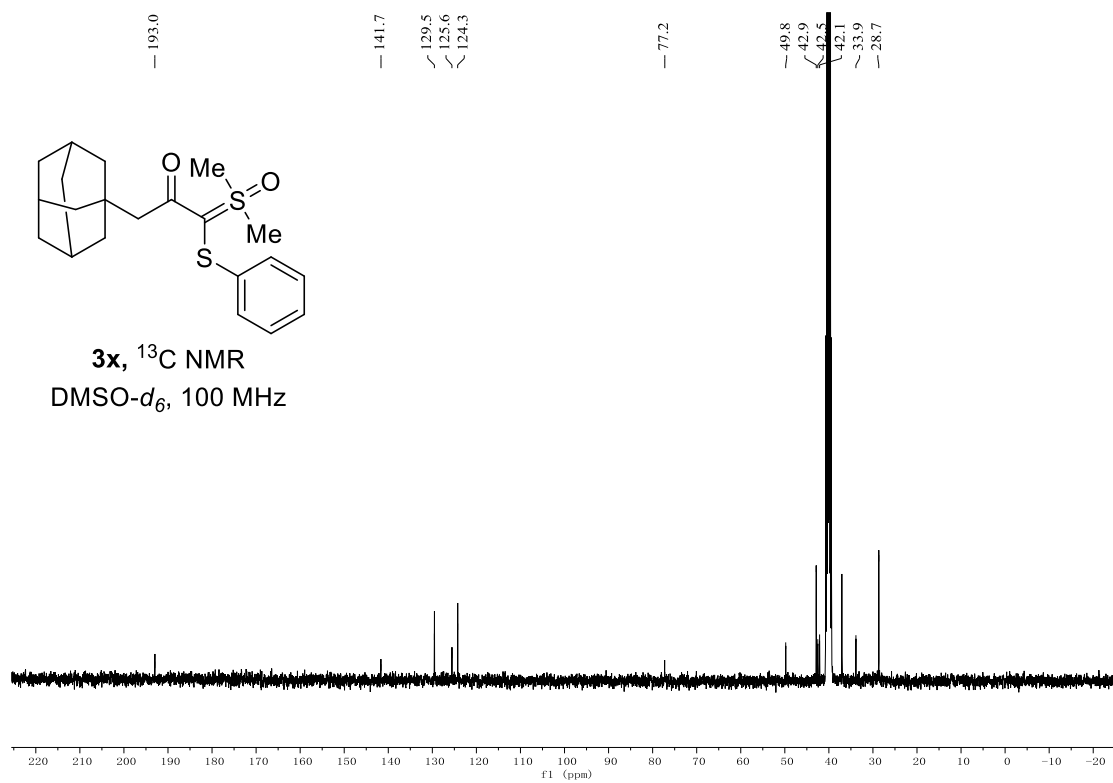

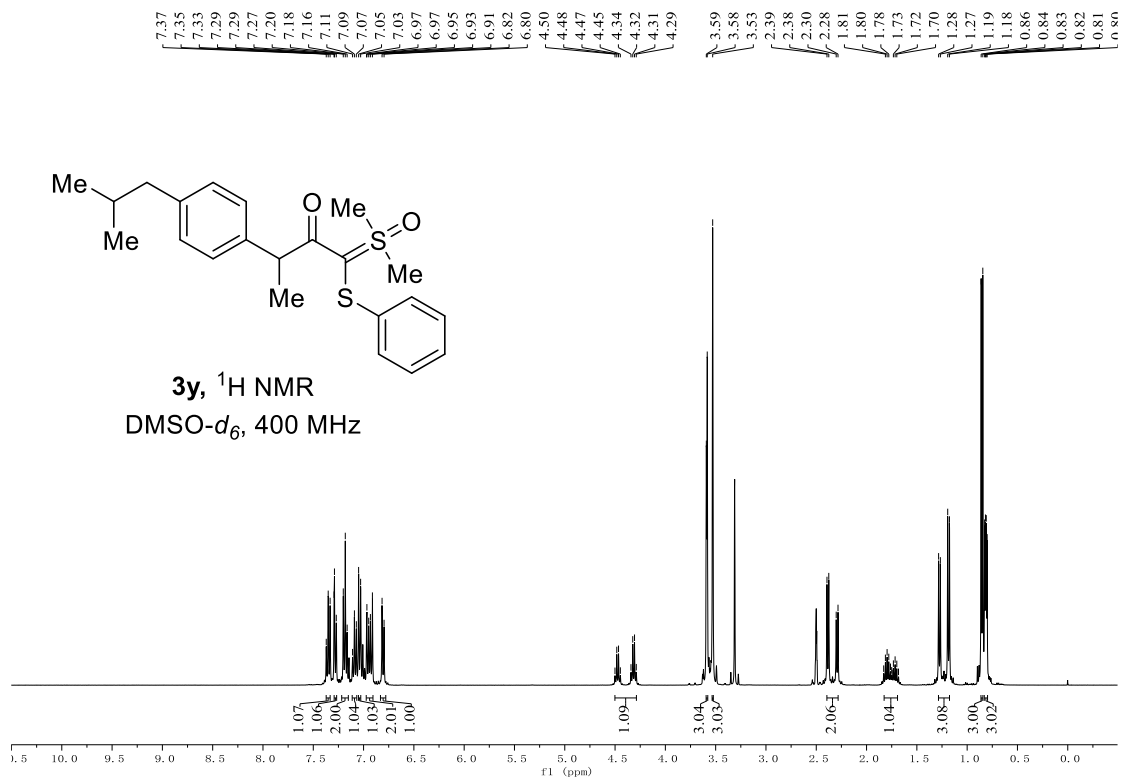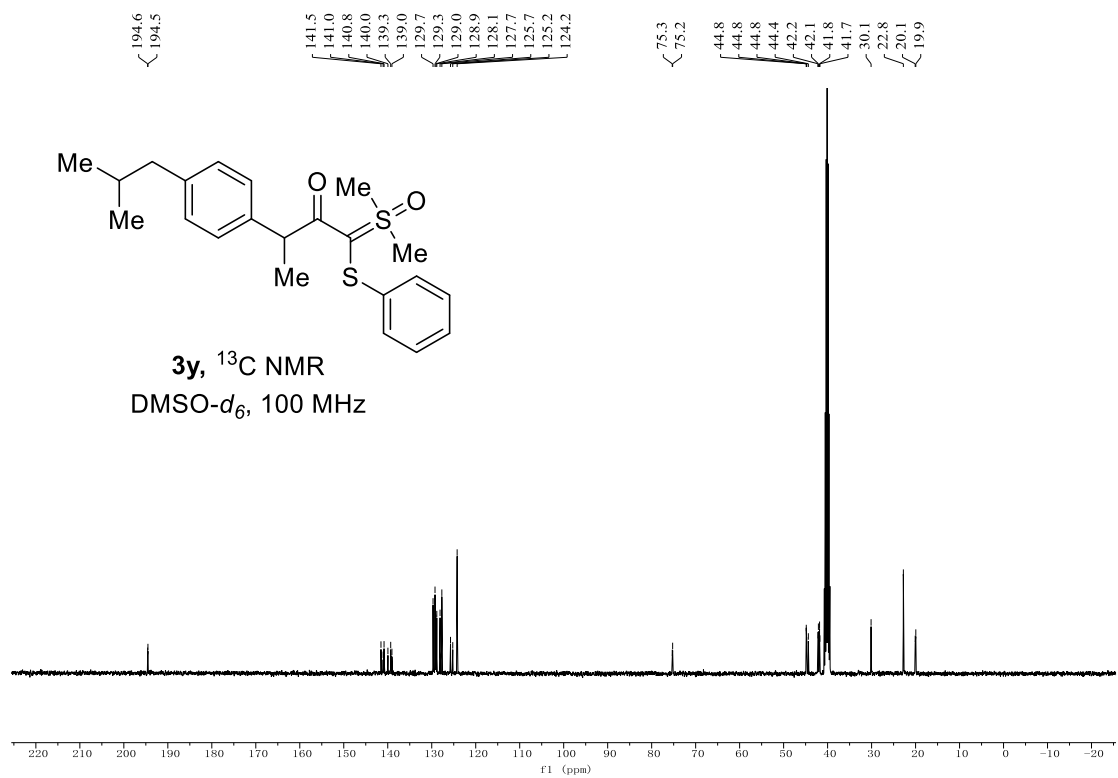

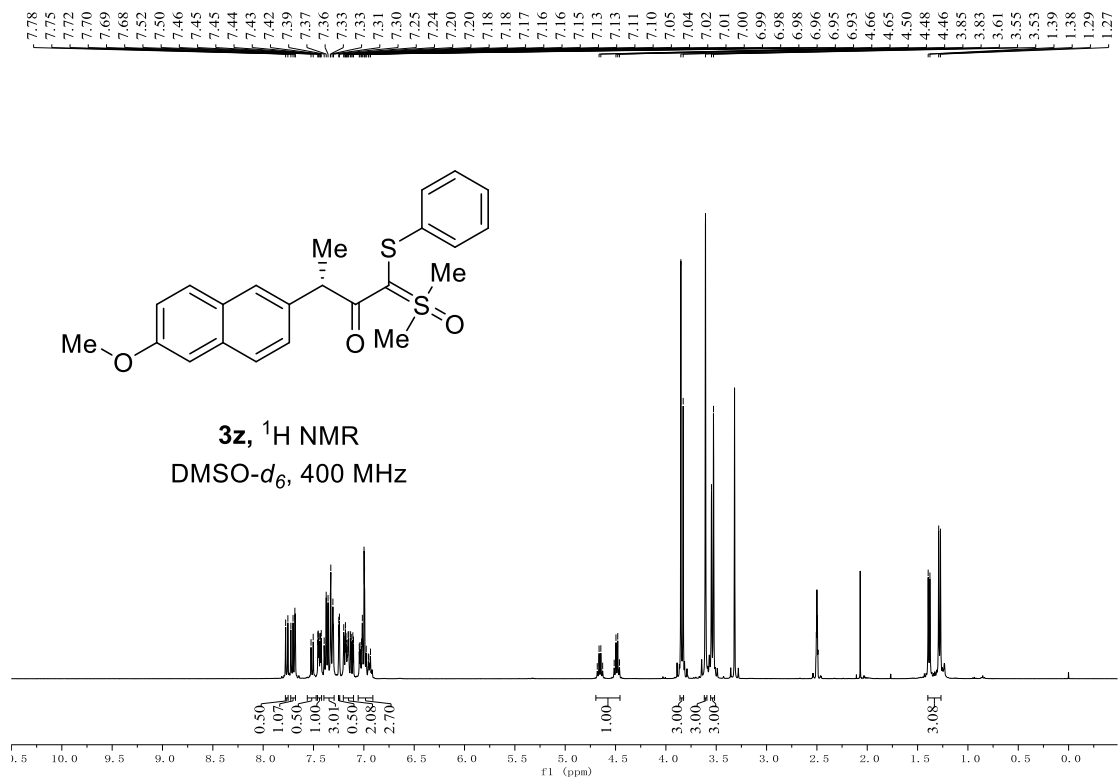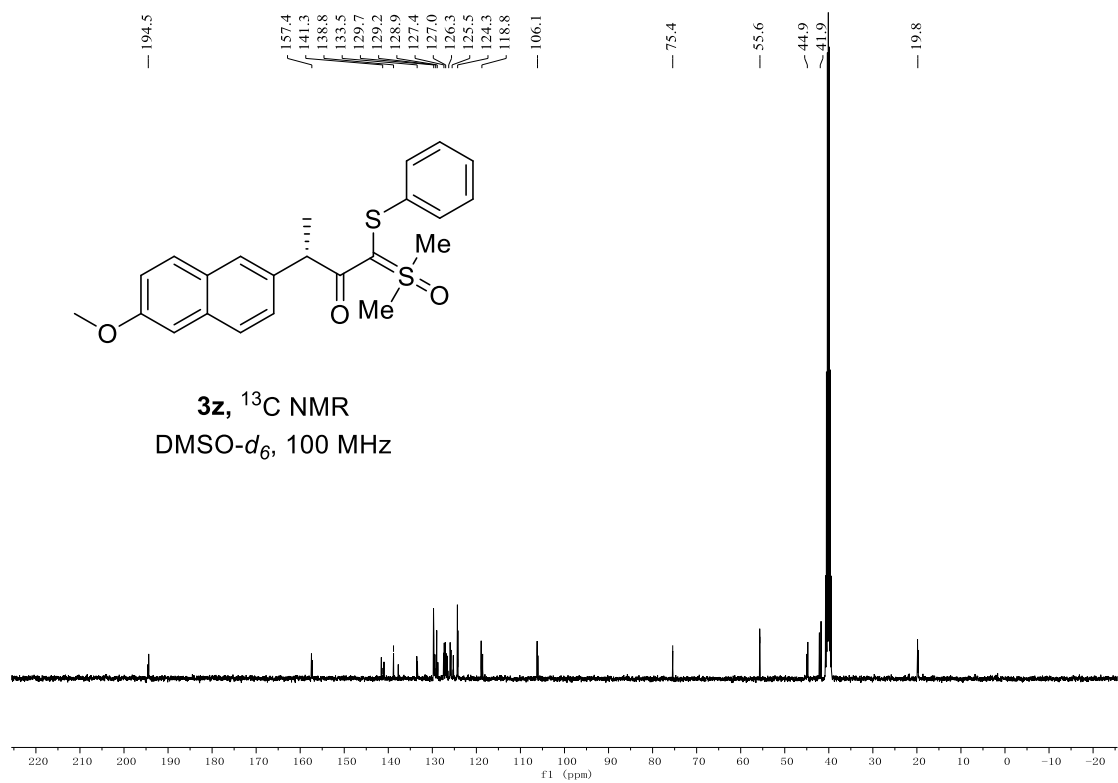

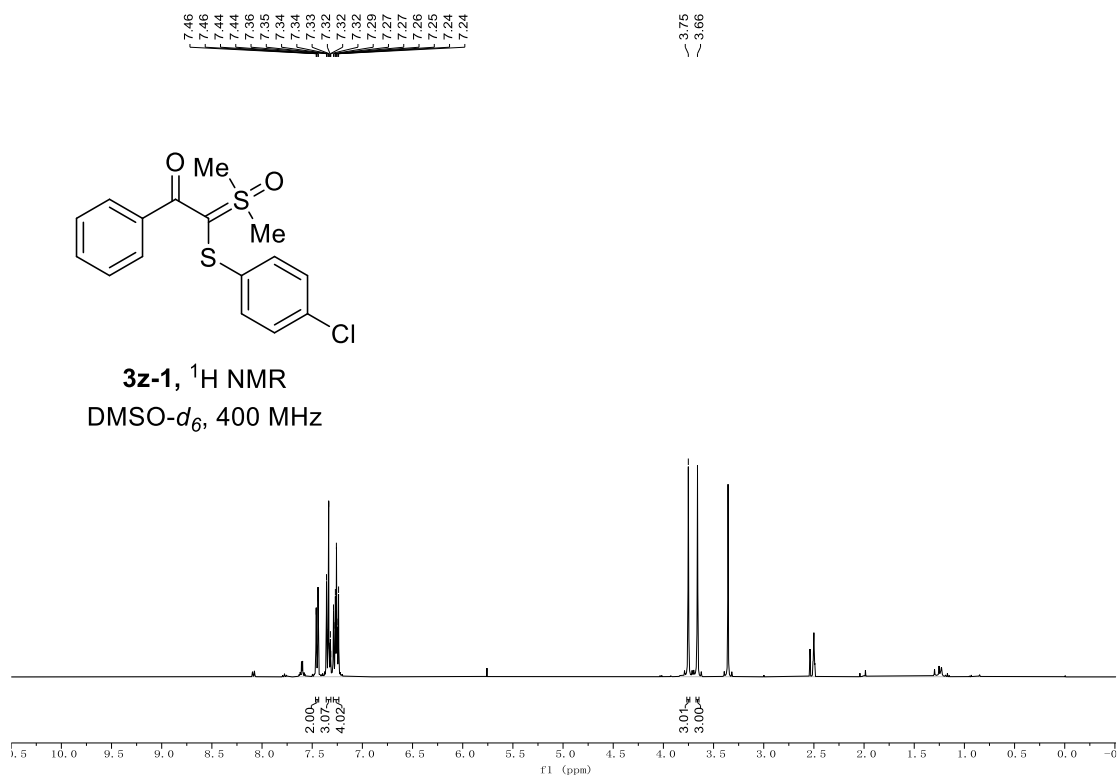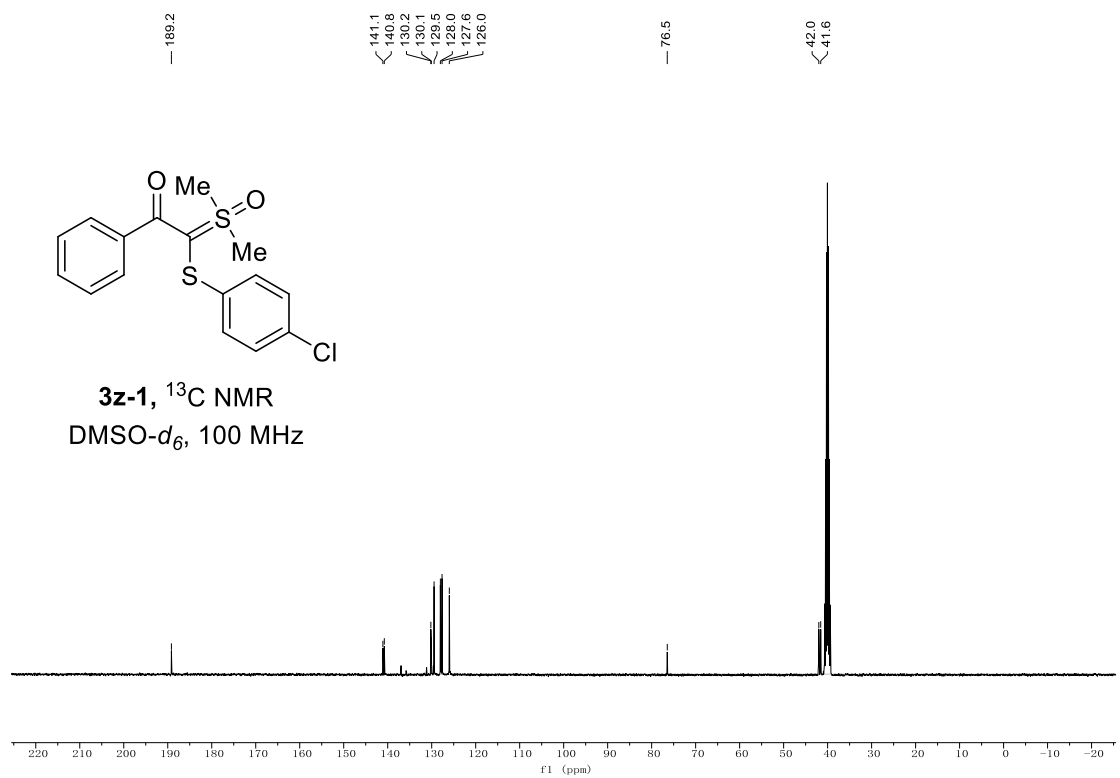

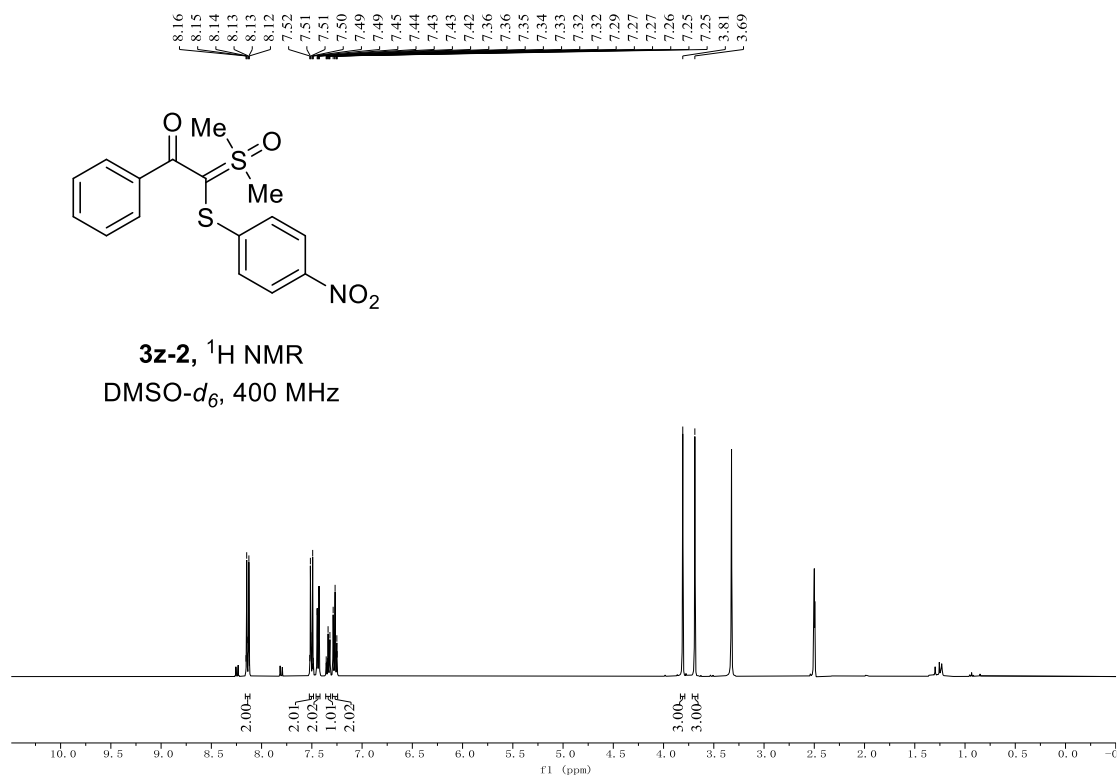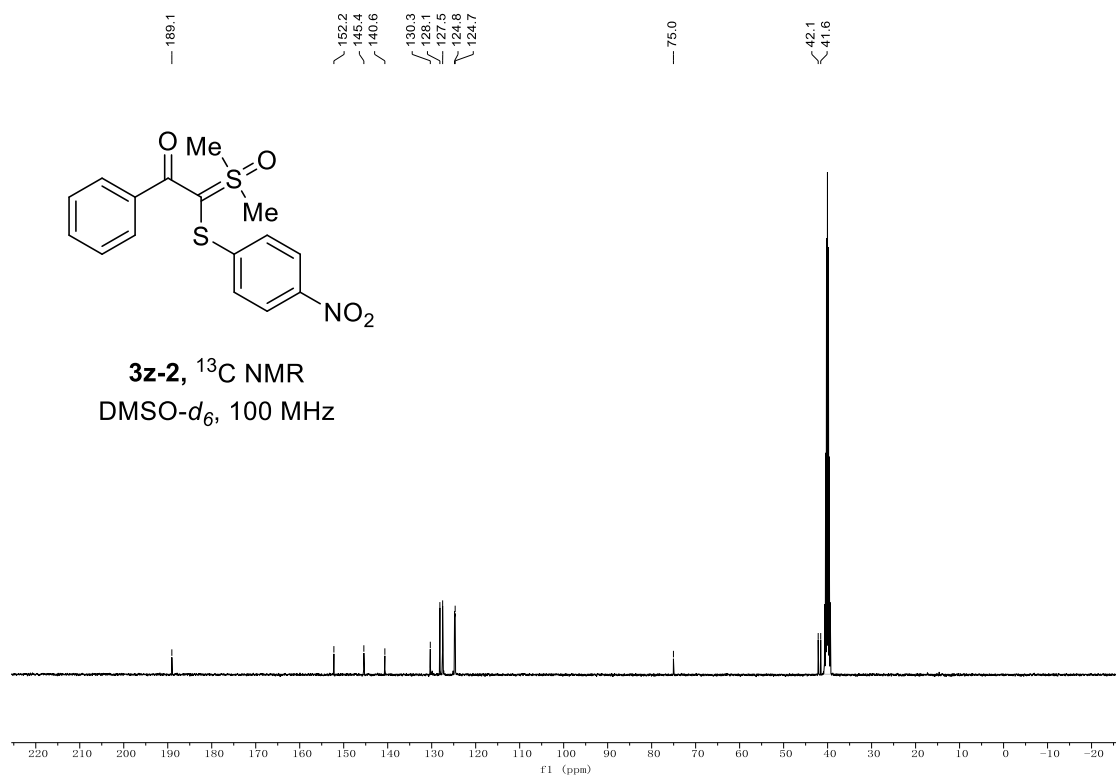

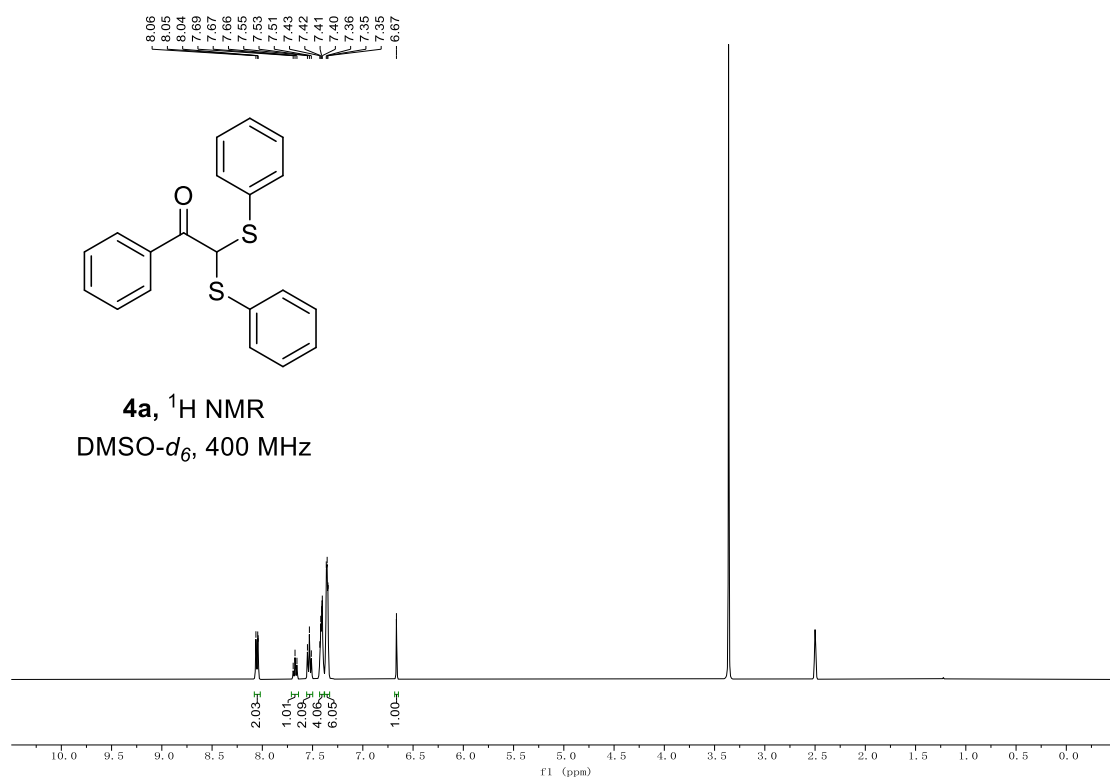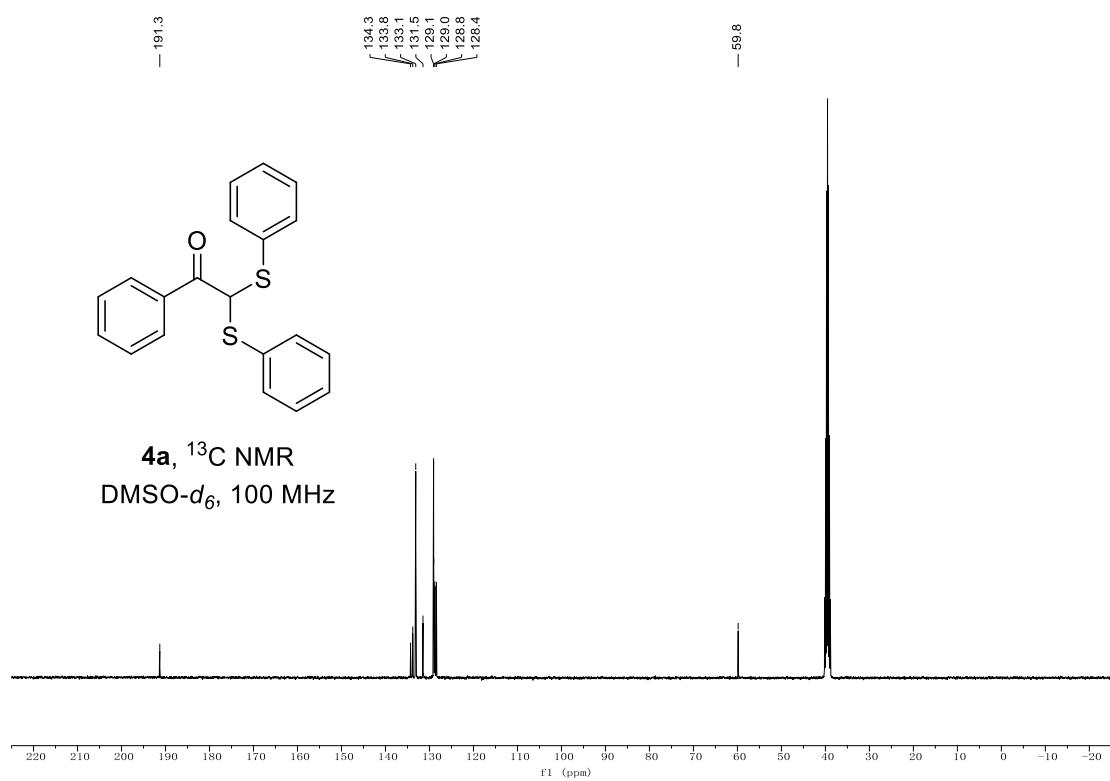

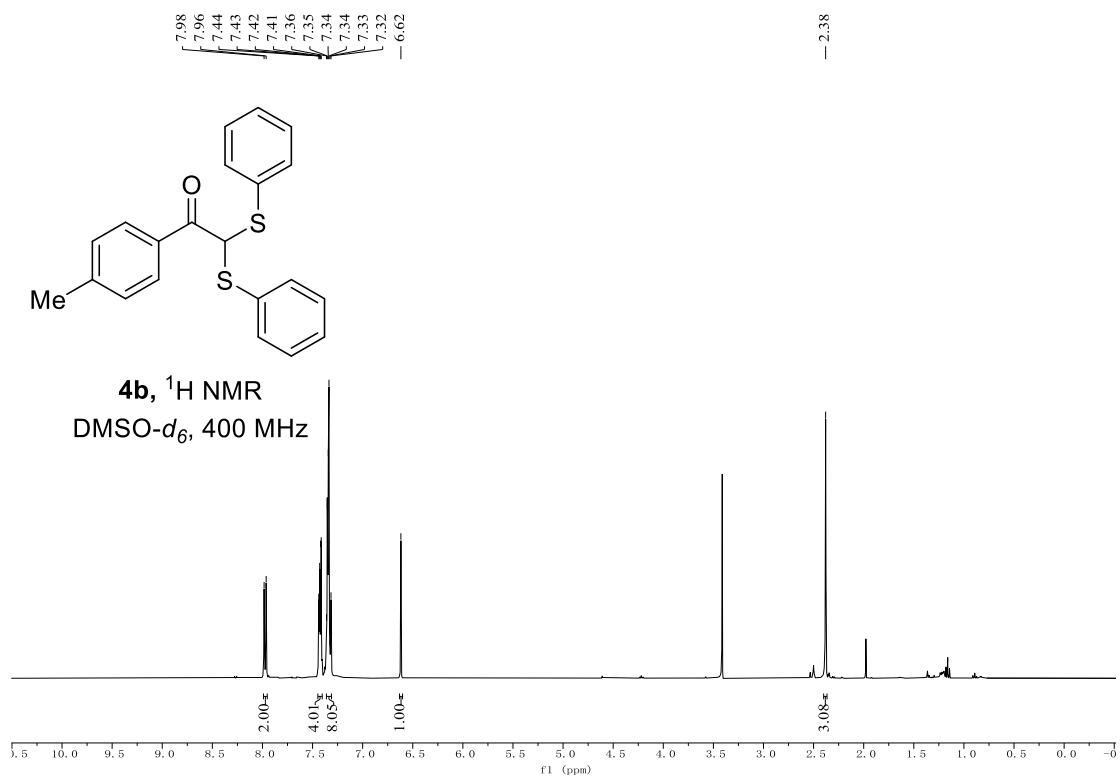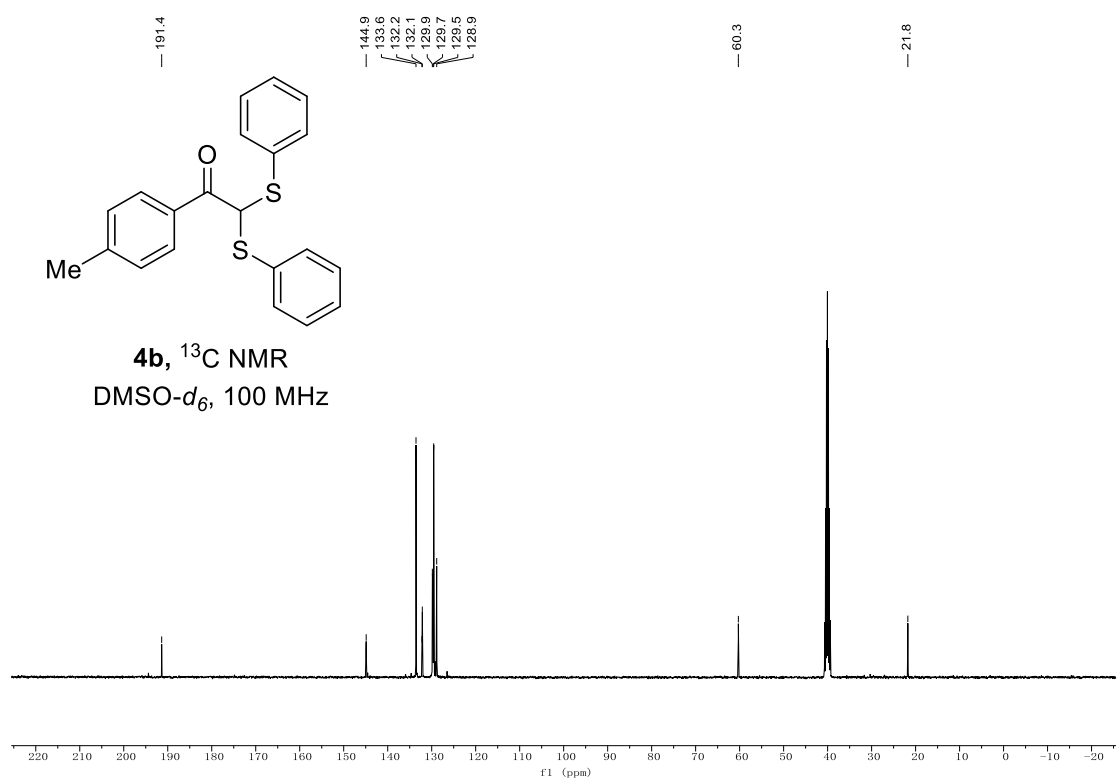

8.16  
7.84  
7.82  
7.81  
7.78  
7.76  
7.75  
7.53  
7.51  
7.49  
7.47  
7.46  
7.45  
7.44  
7.43  
7.37  
7.36  
7.35  
7.34  
6.71  
6.69

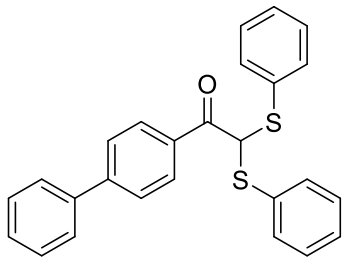

**4c, <sup>1</sup>H NMR**  
DMSO-*d*<sub>6</sub>, 400 MHz

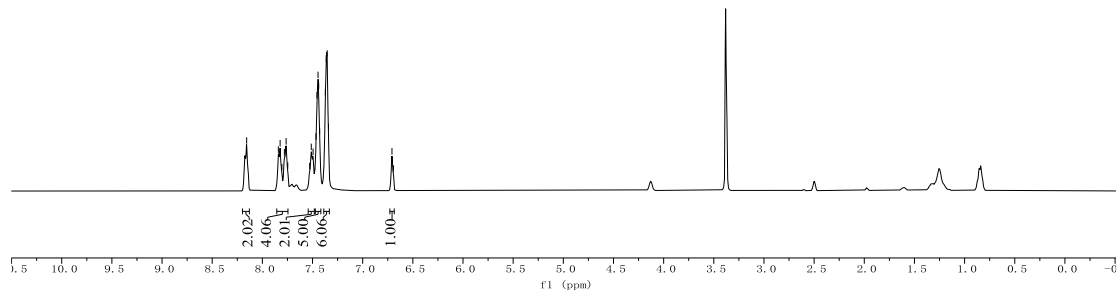

191.3  
145.6  
139.3  
133.7  
132.1  
130.3  
129.6  
129.6  
129.2  
129.1  
128.9  
127.6  
127.4  
60.4

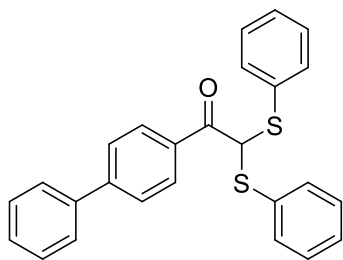

**4c, <sup>13</sup>C NMR**  
DMSO-*d*<sub>6</sub>, 100 MHz

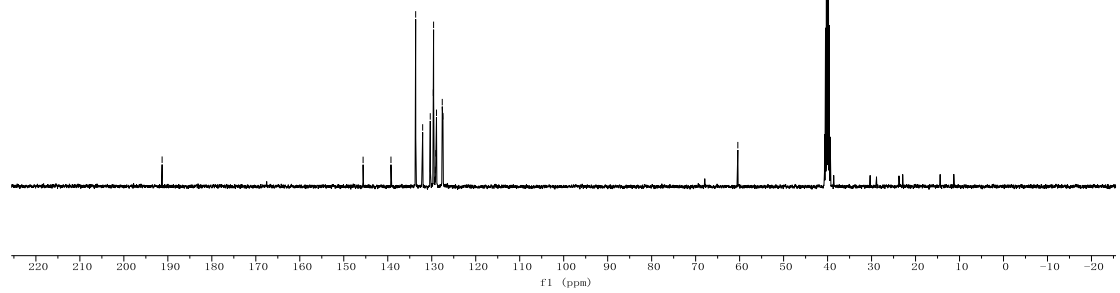



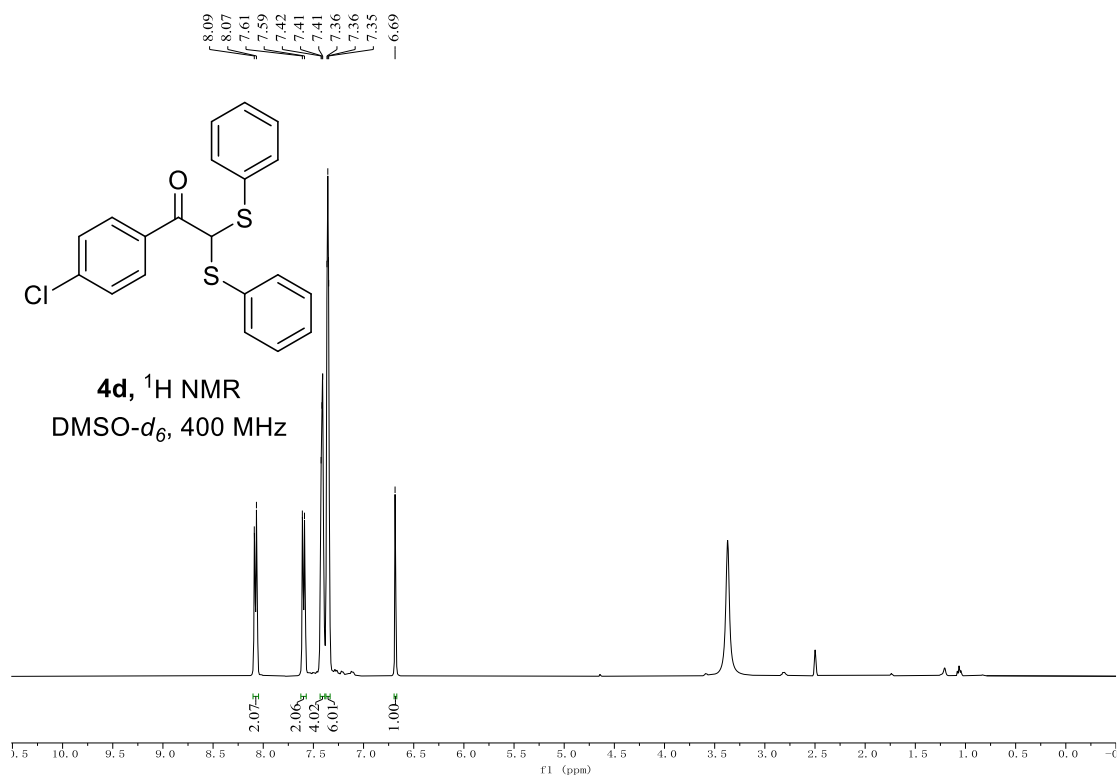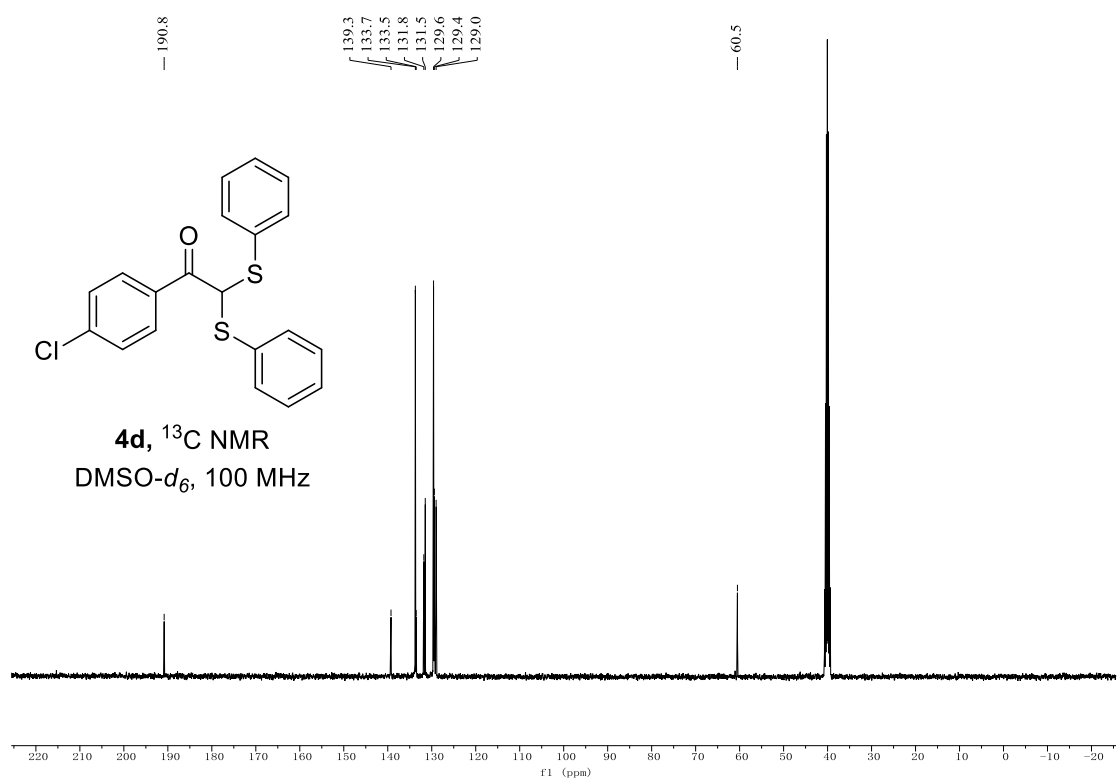

+

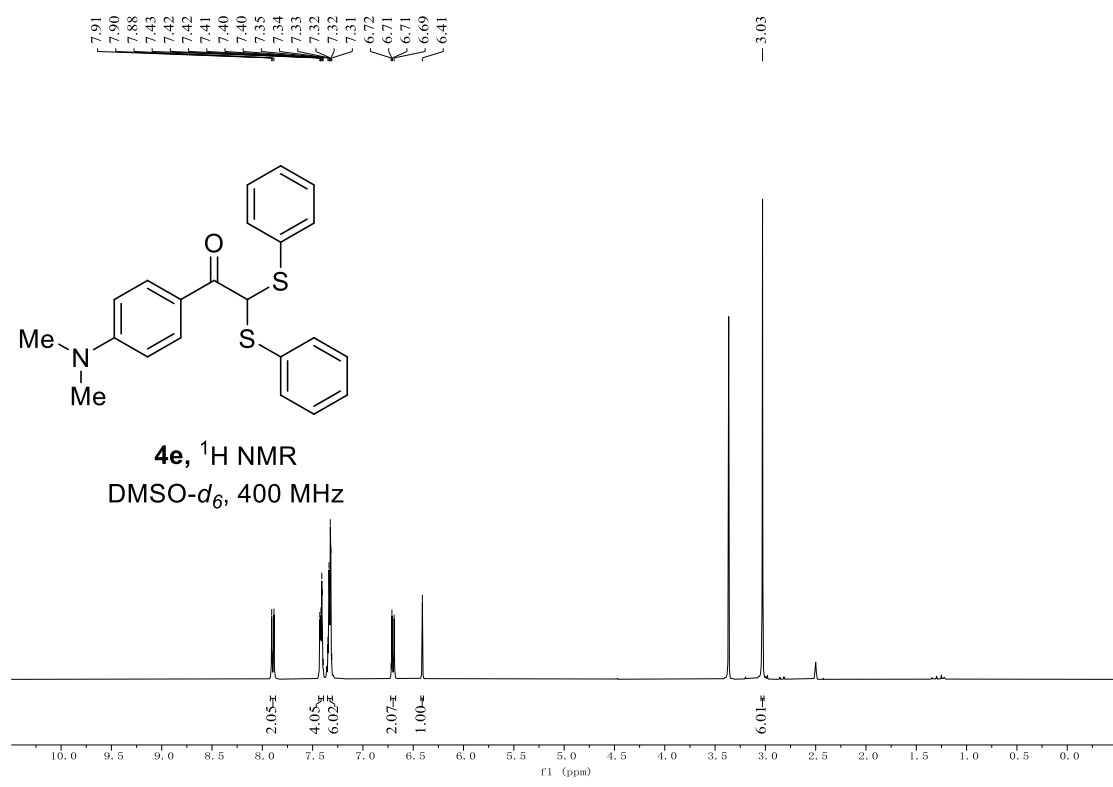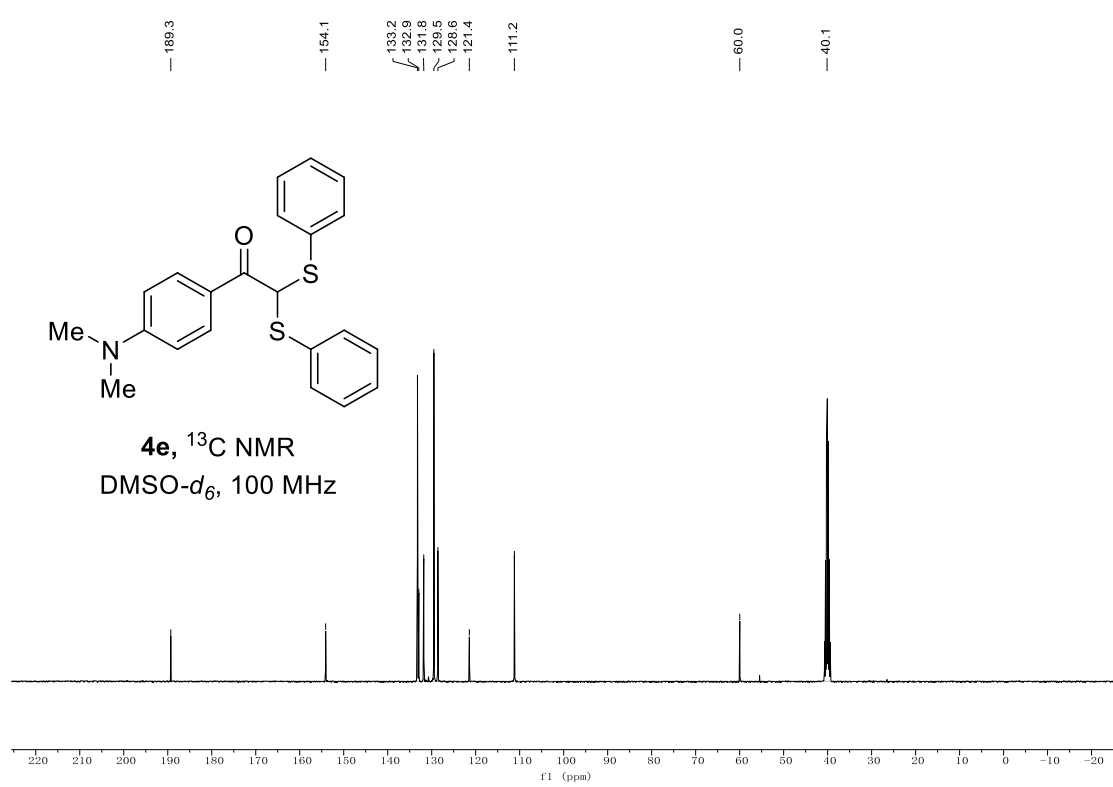

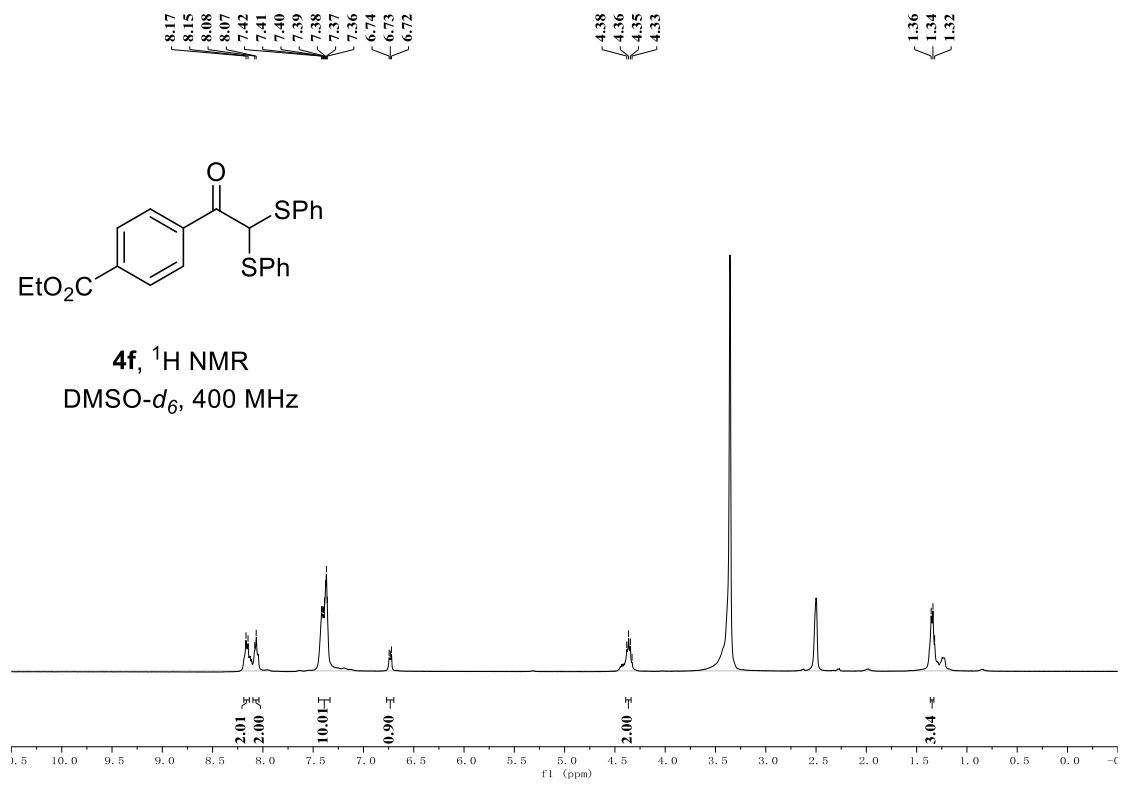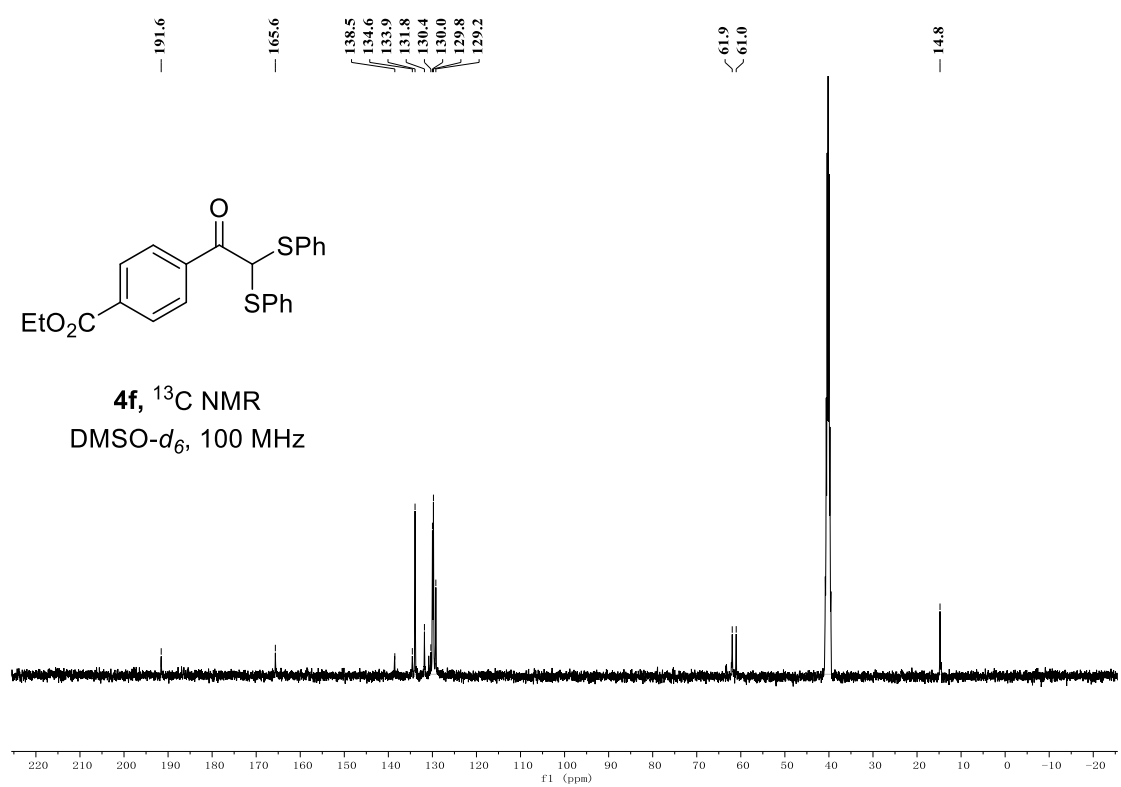

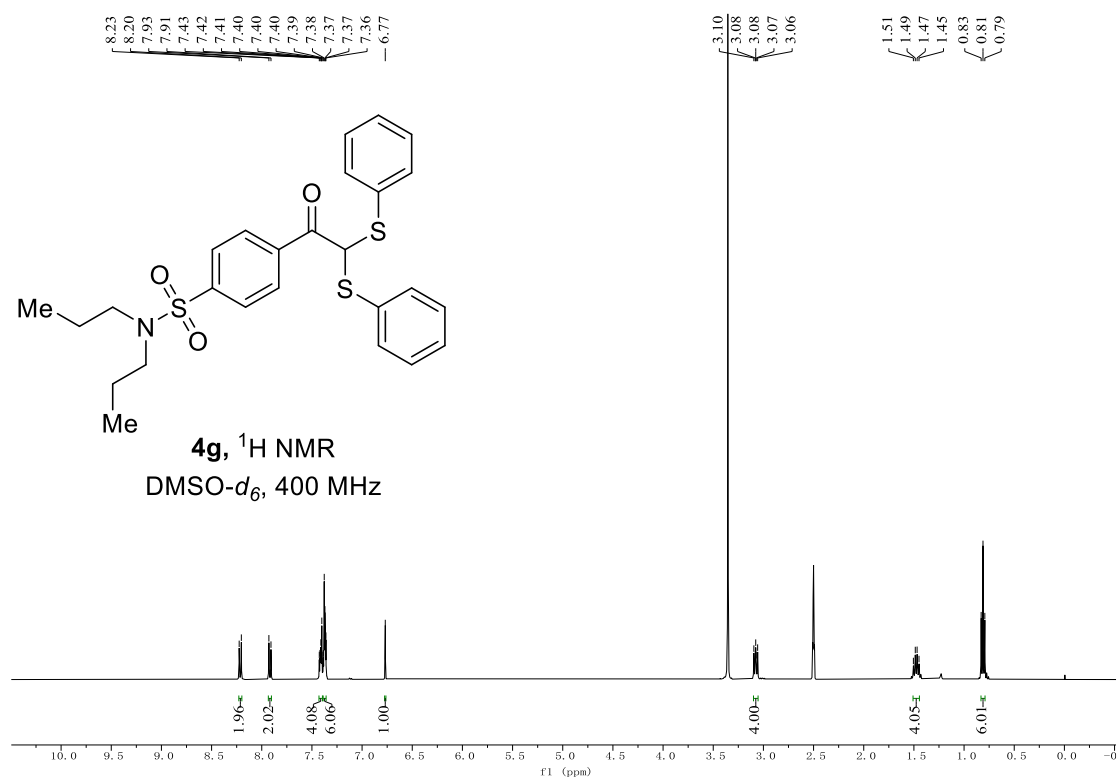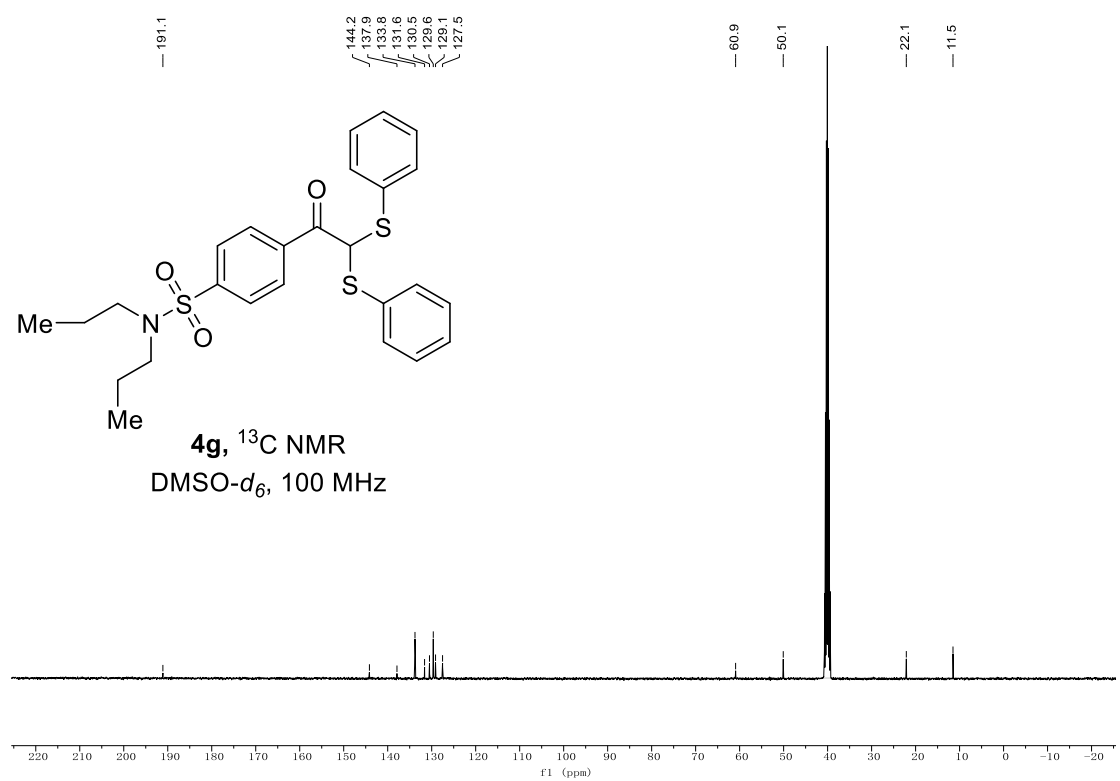

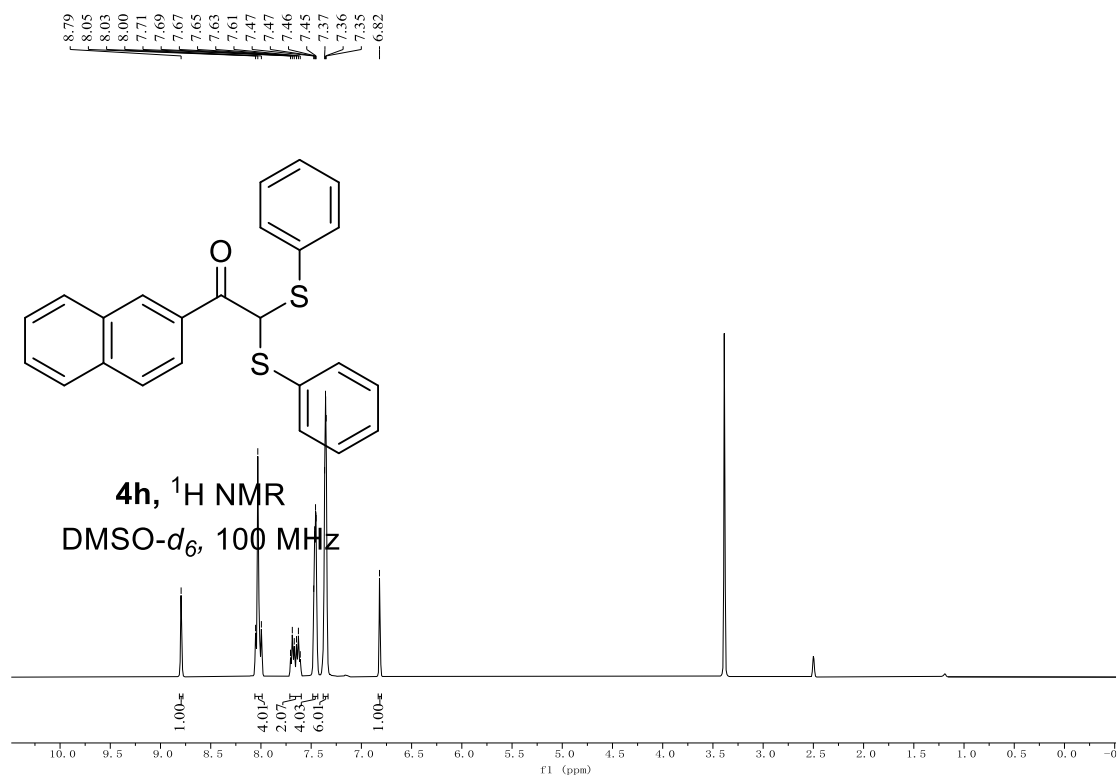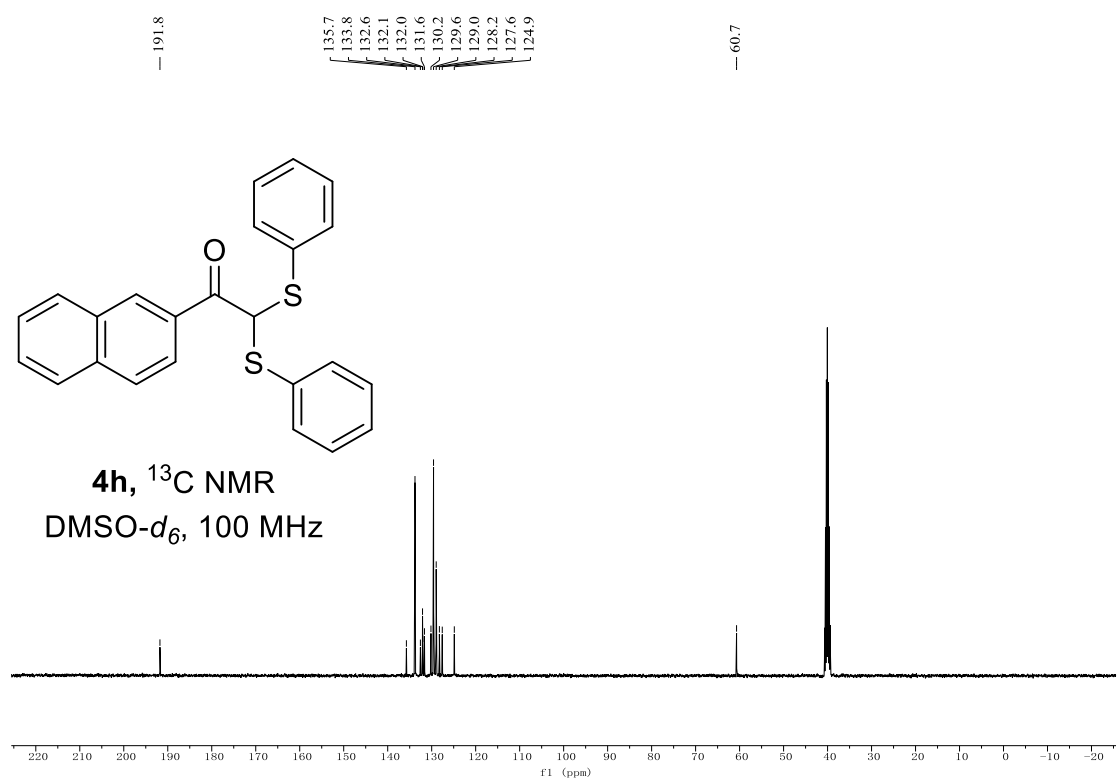

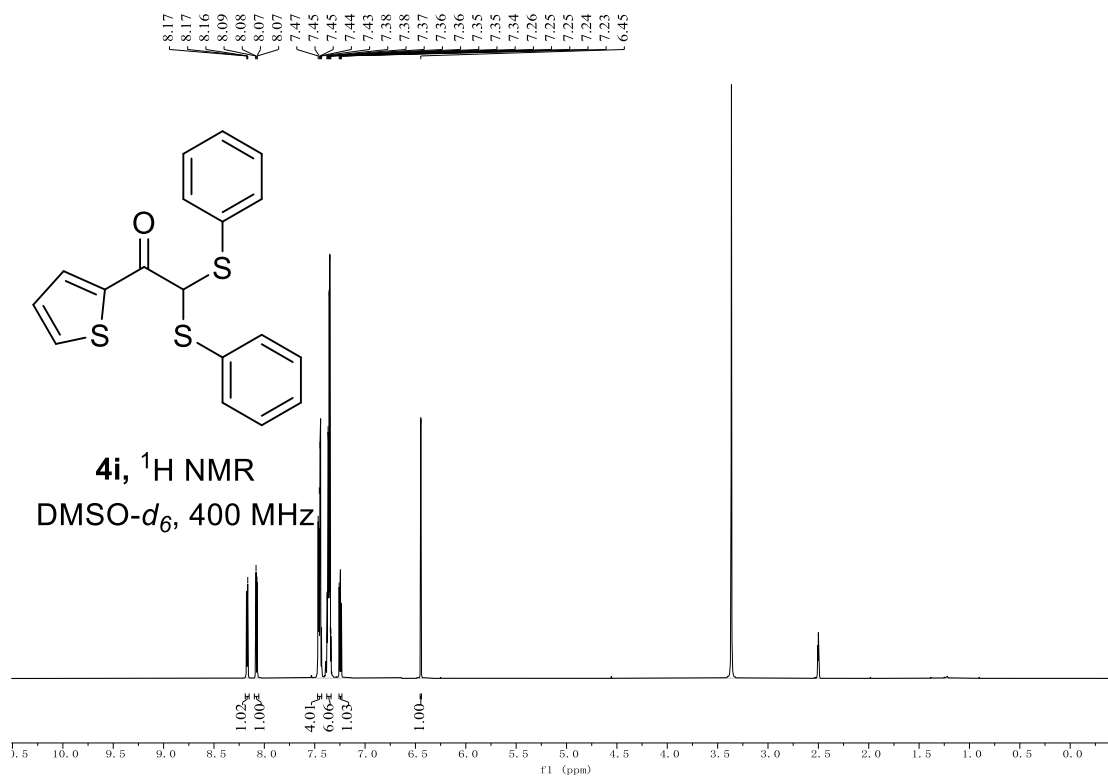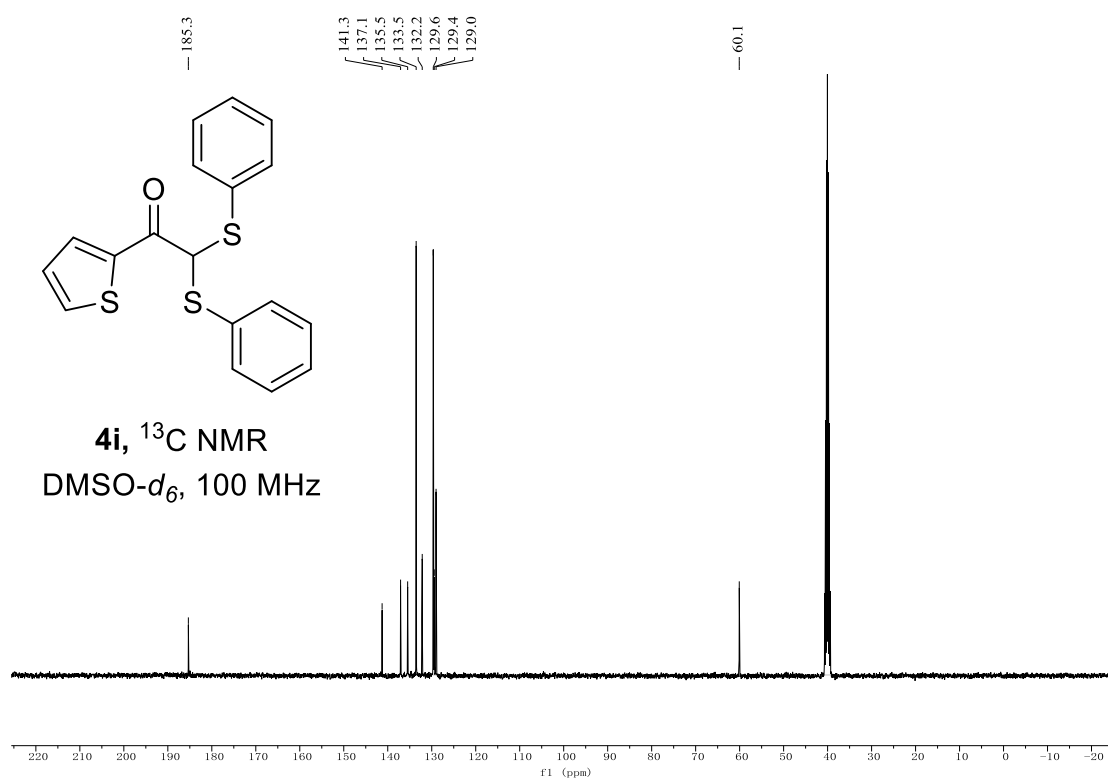

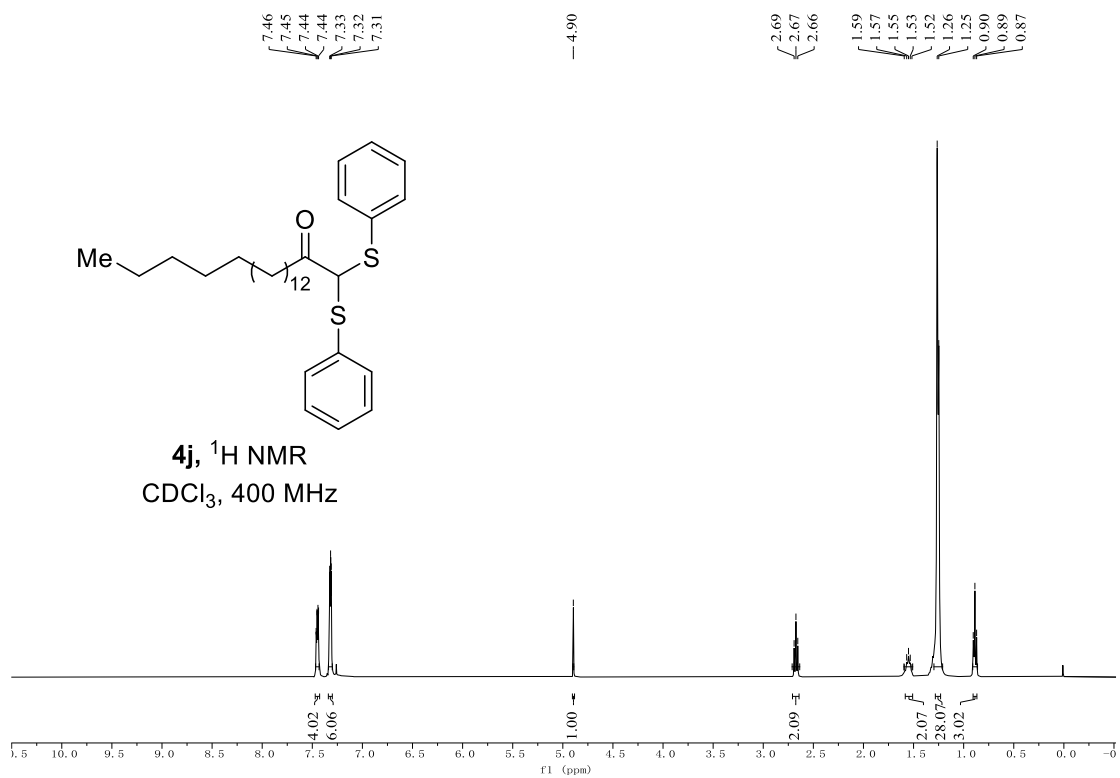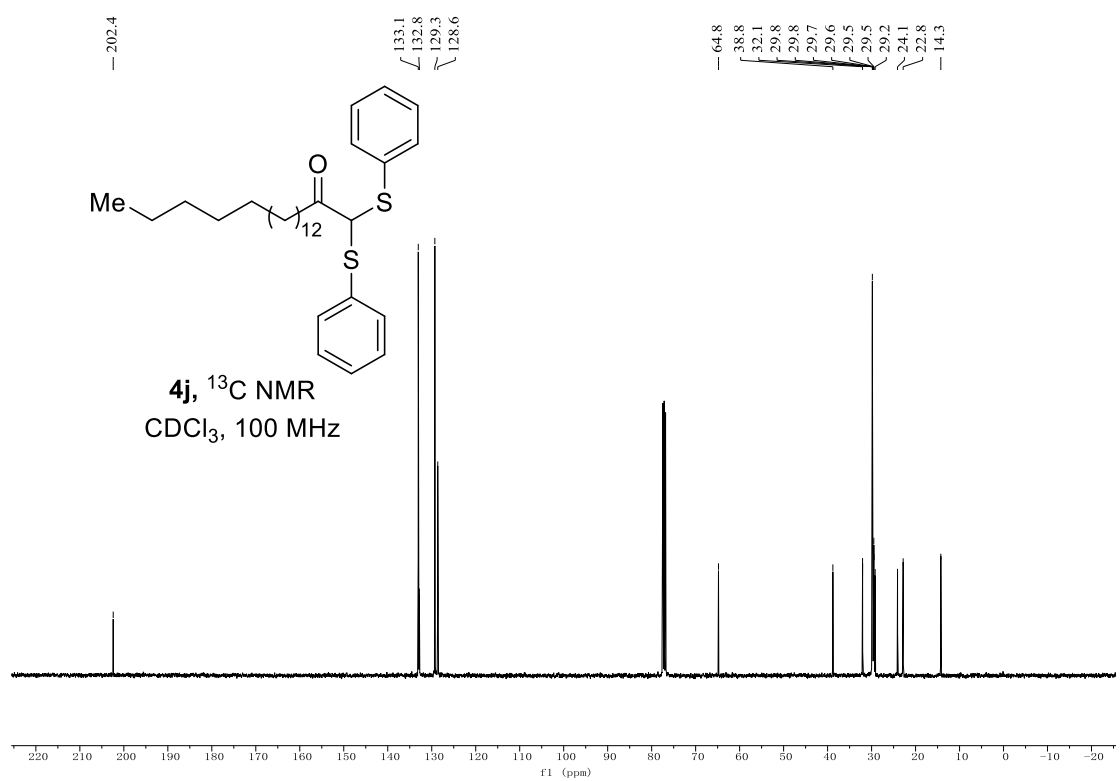

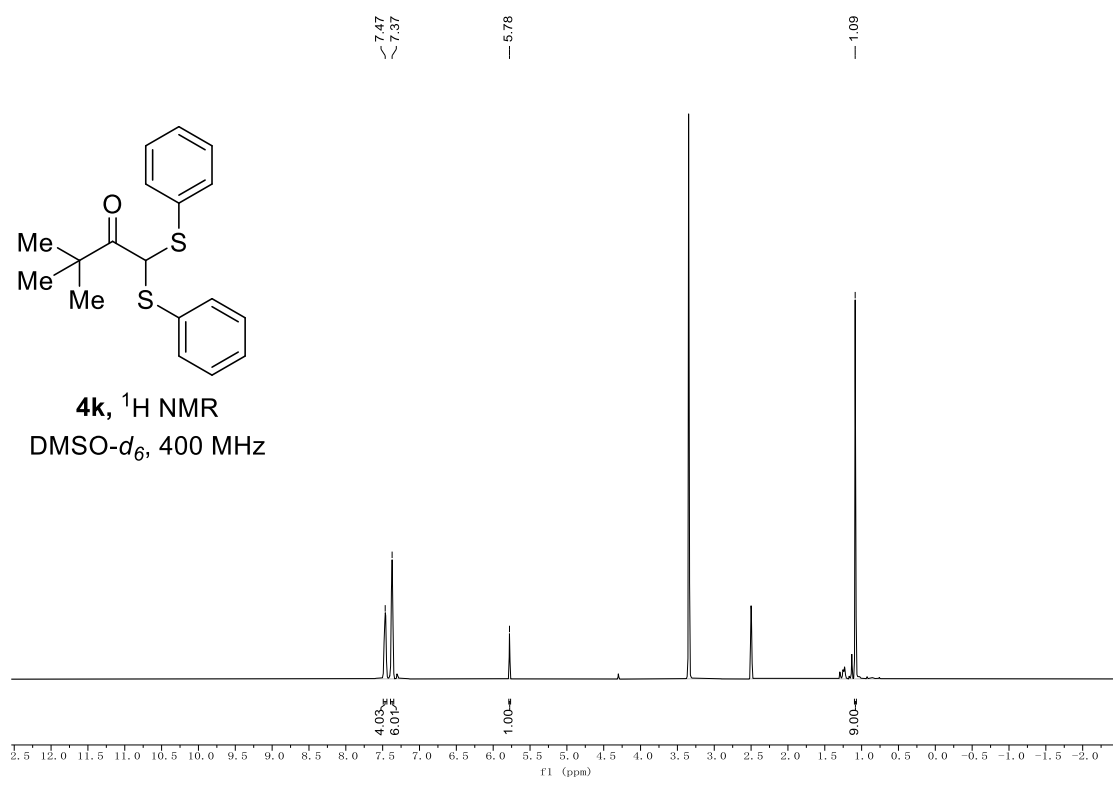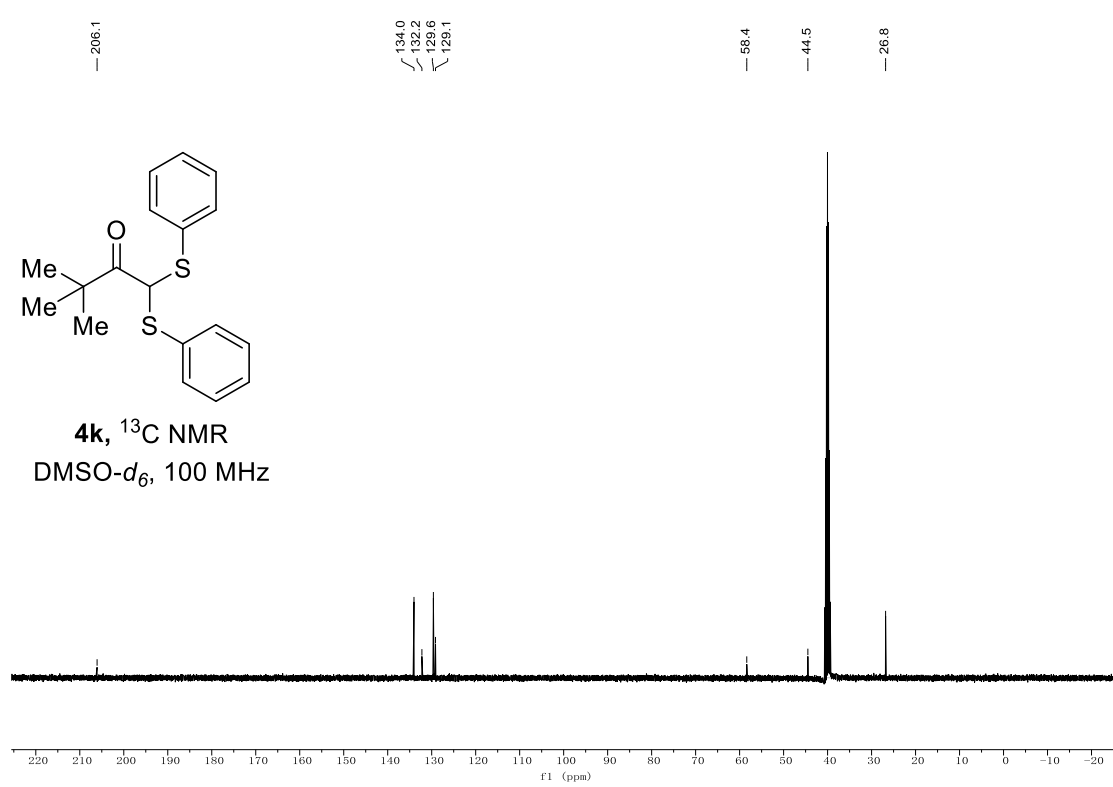





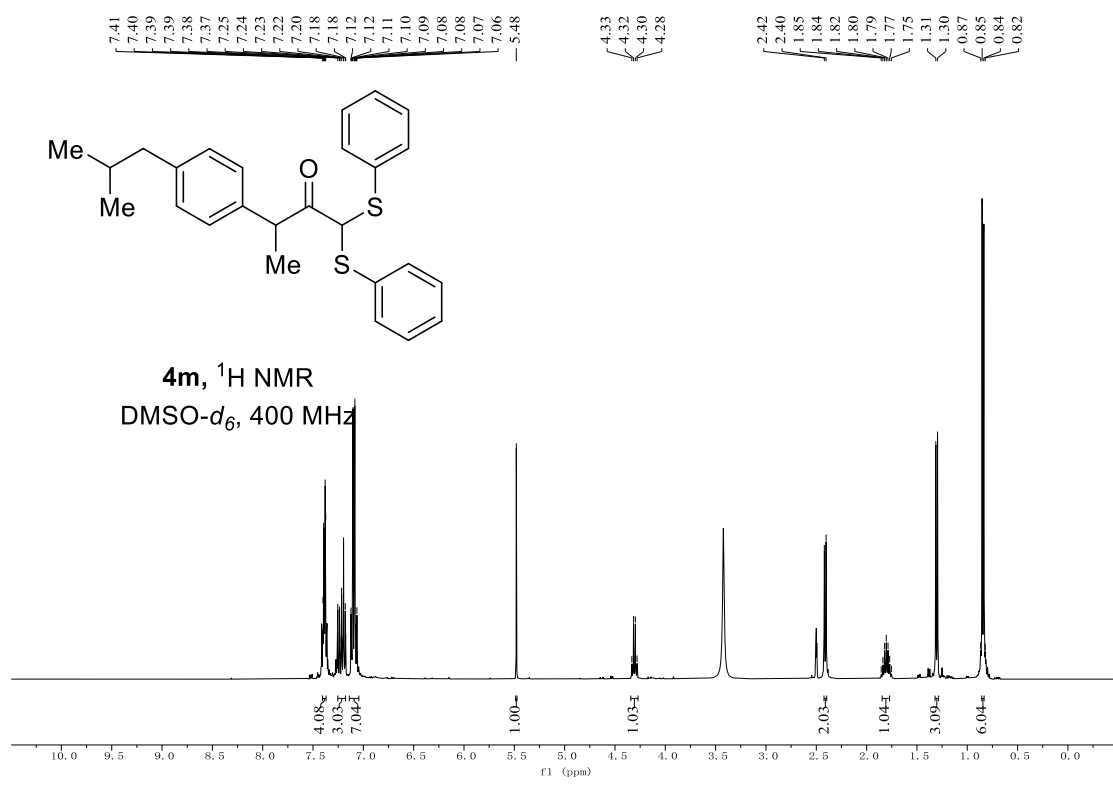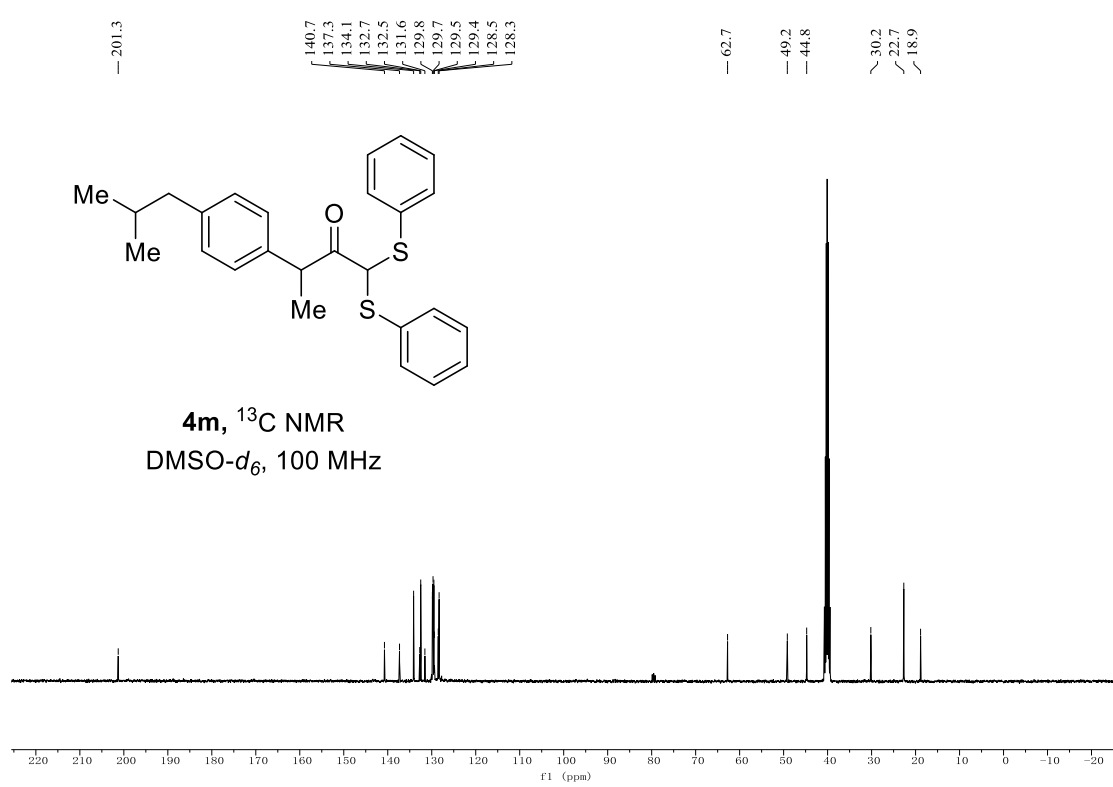

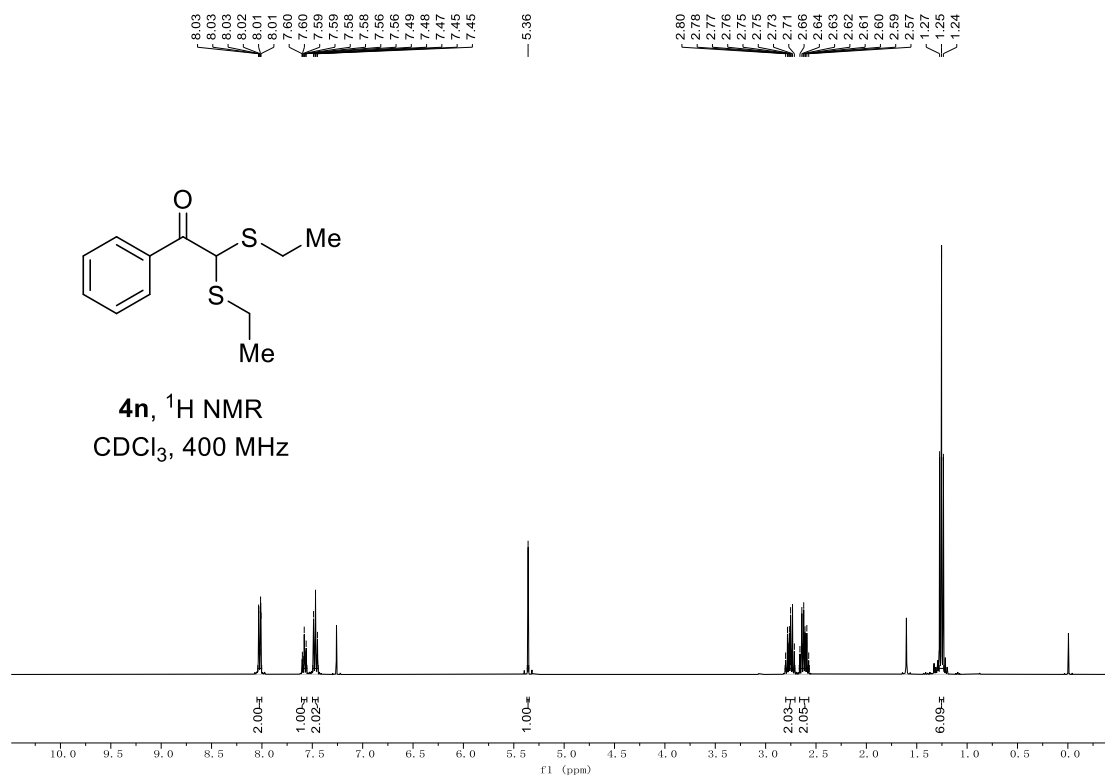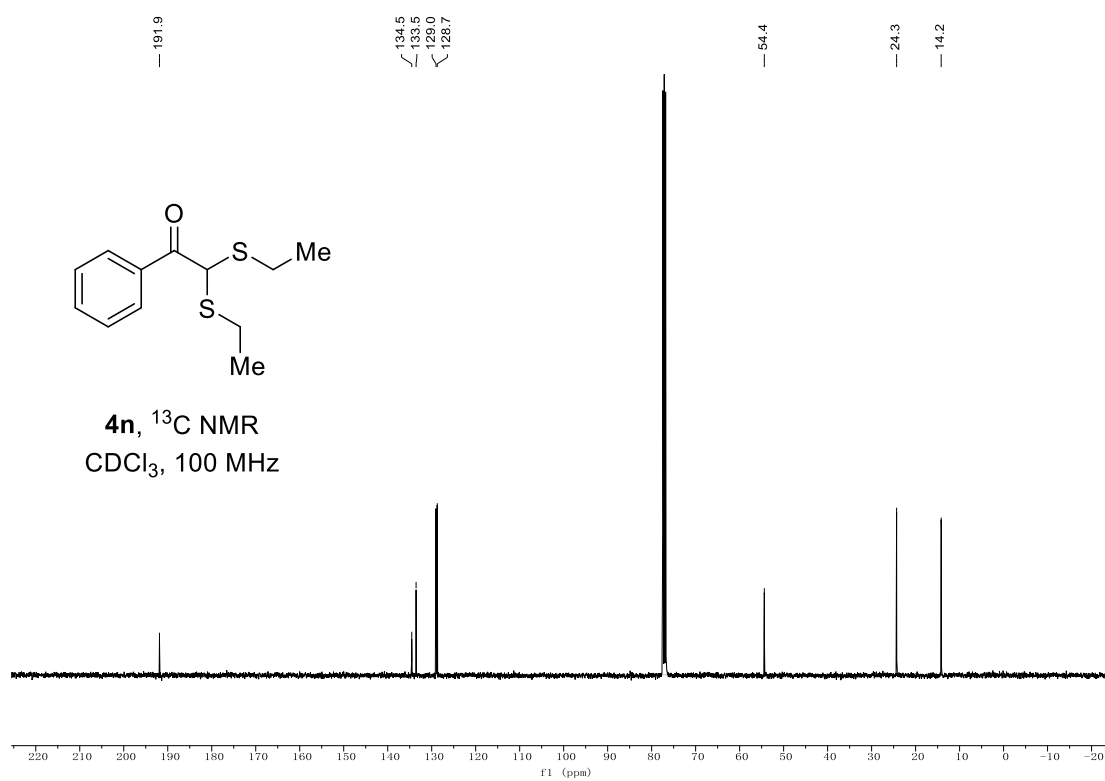

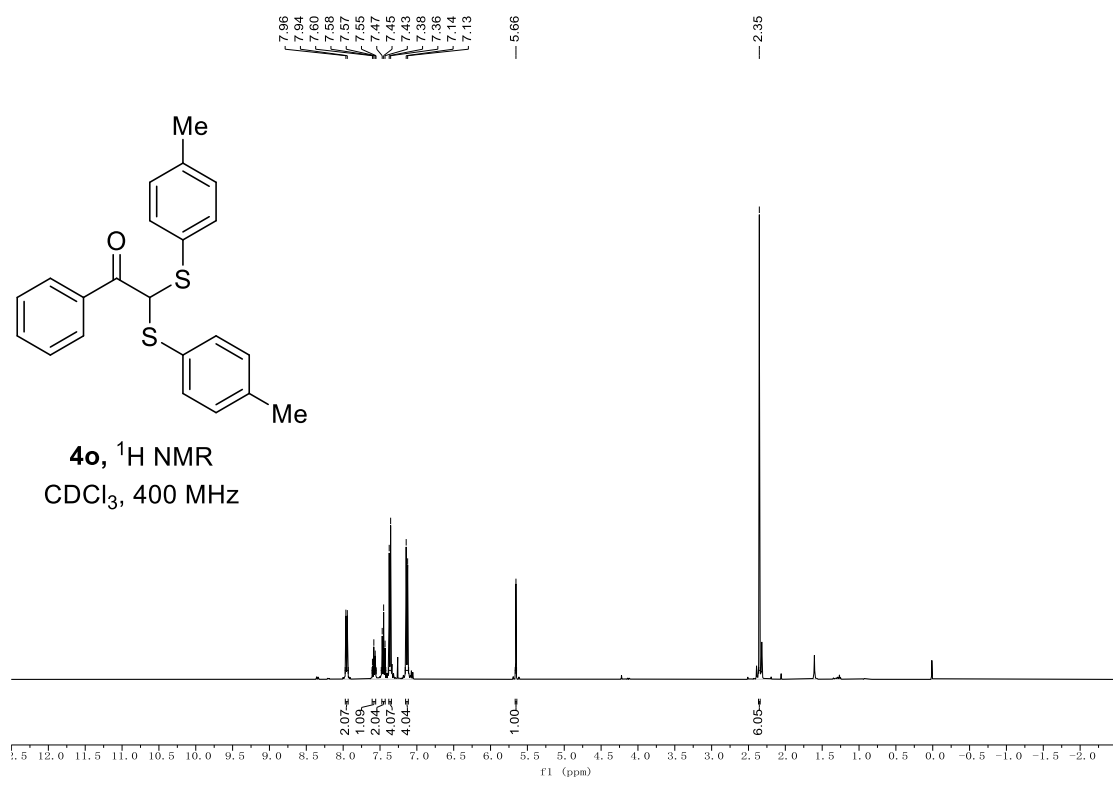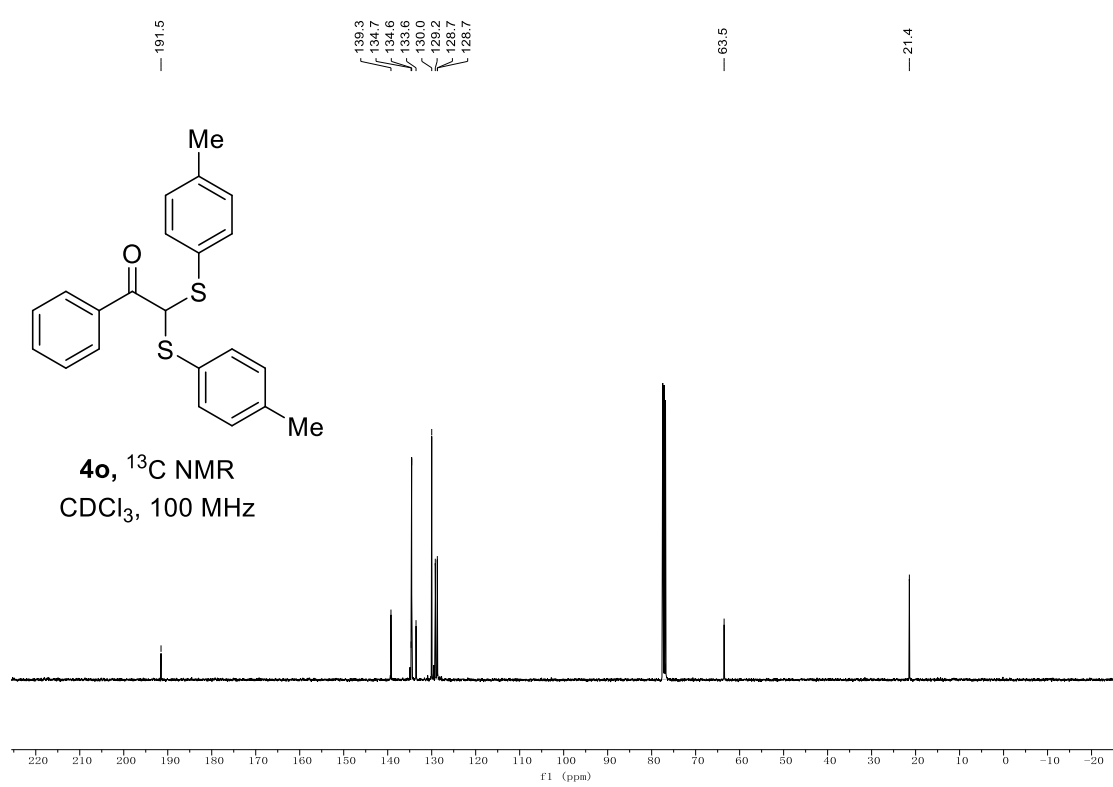

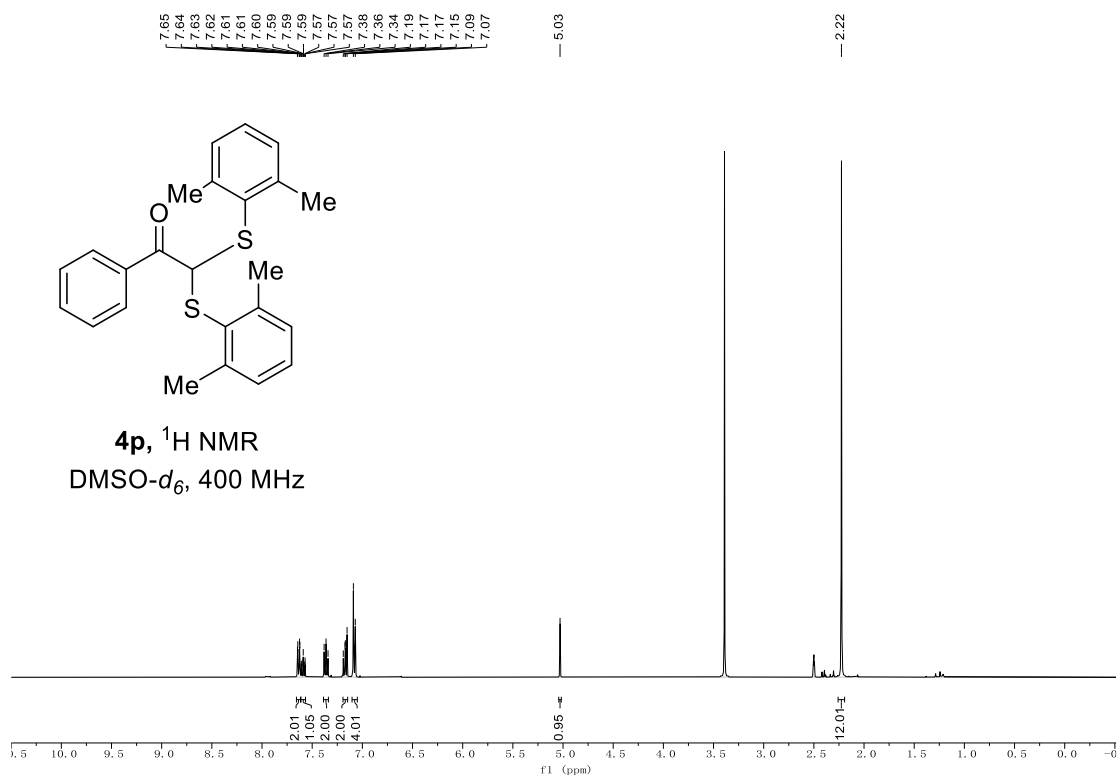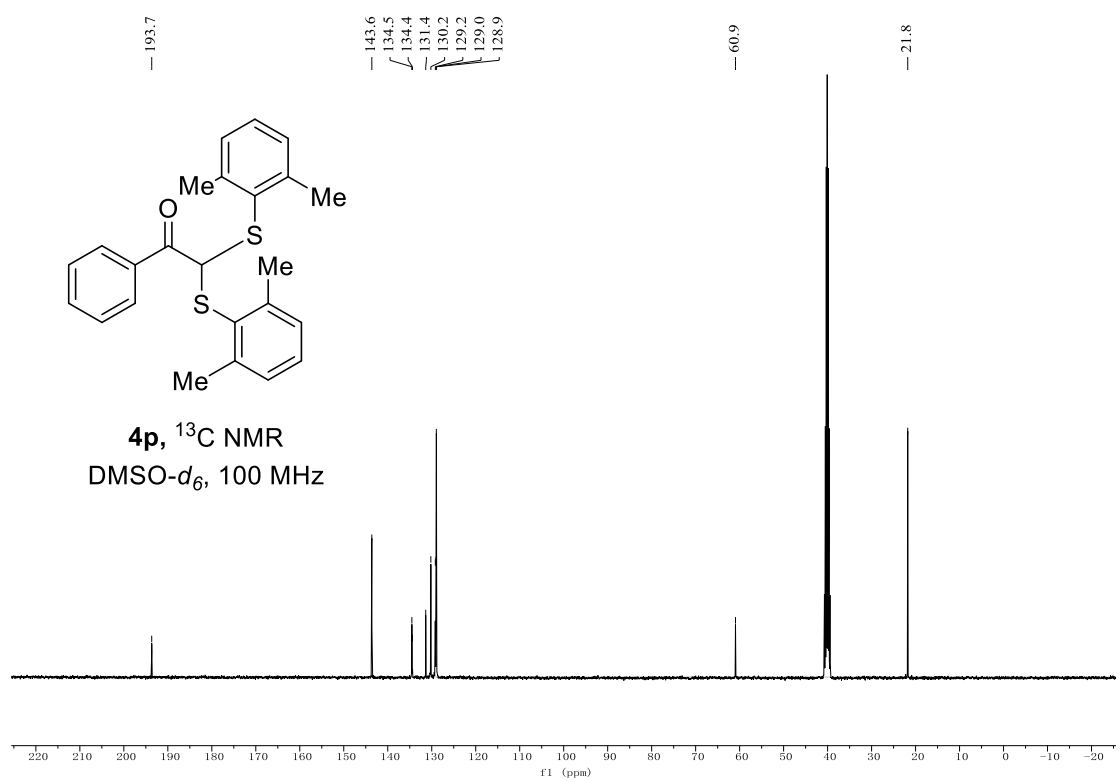

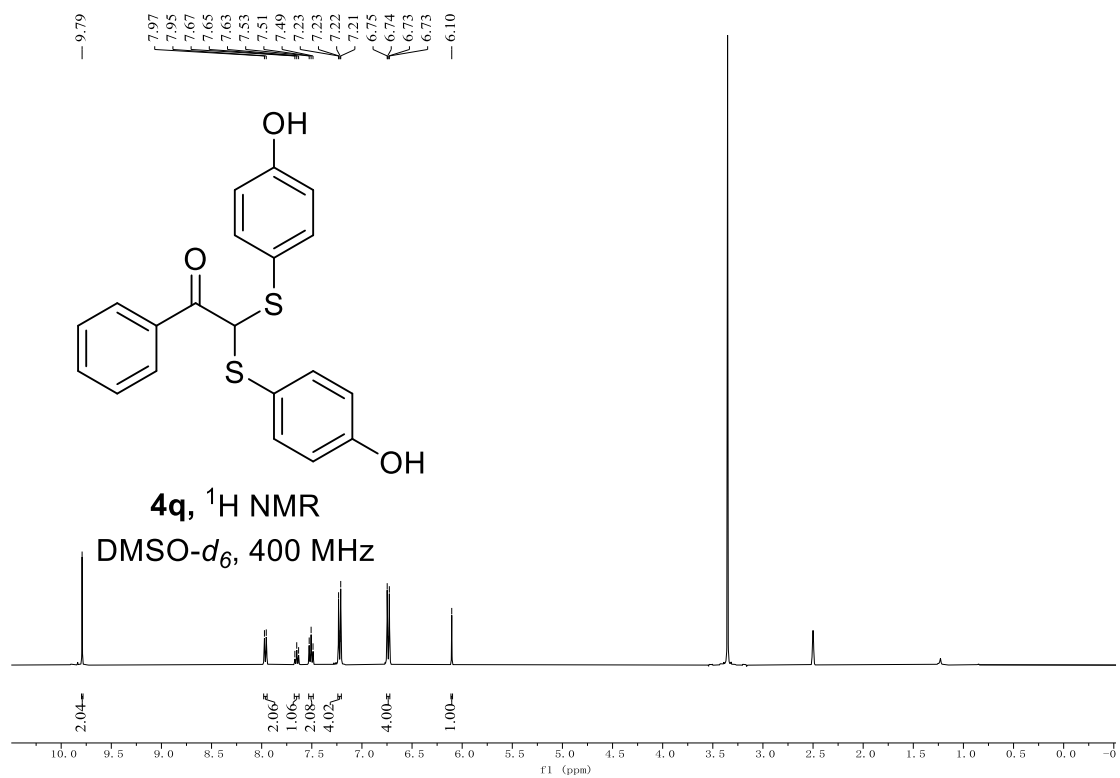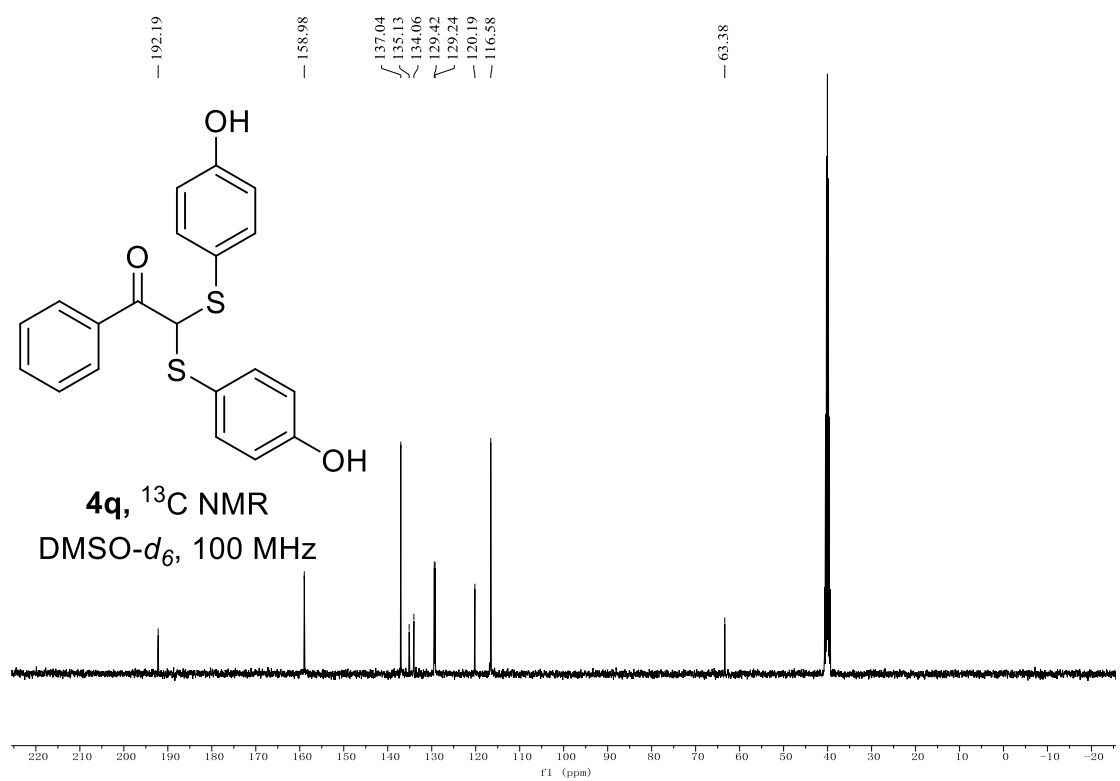

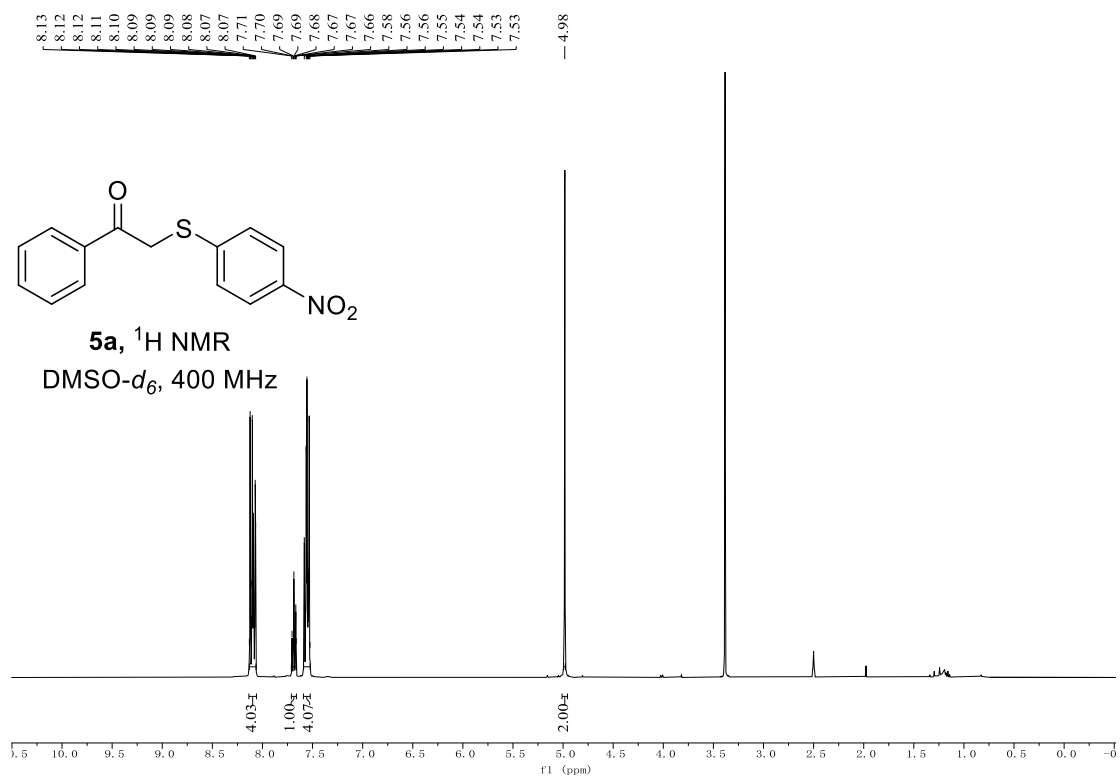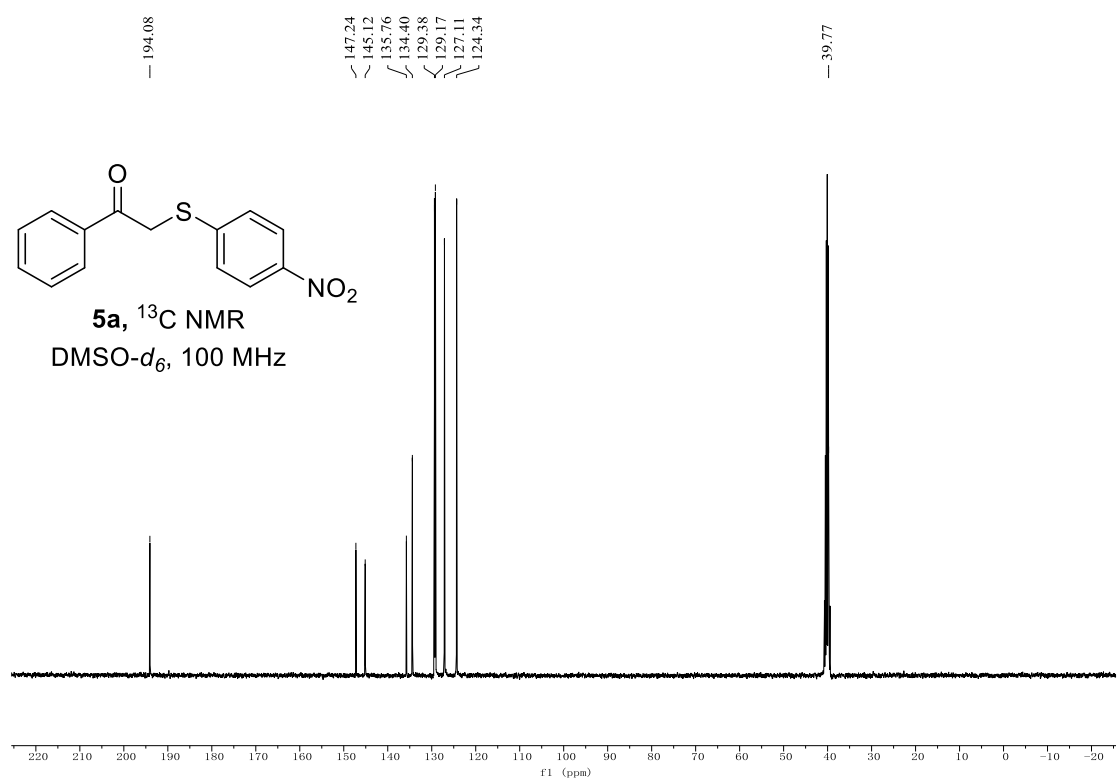

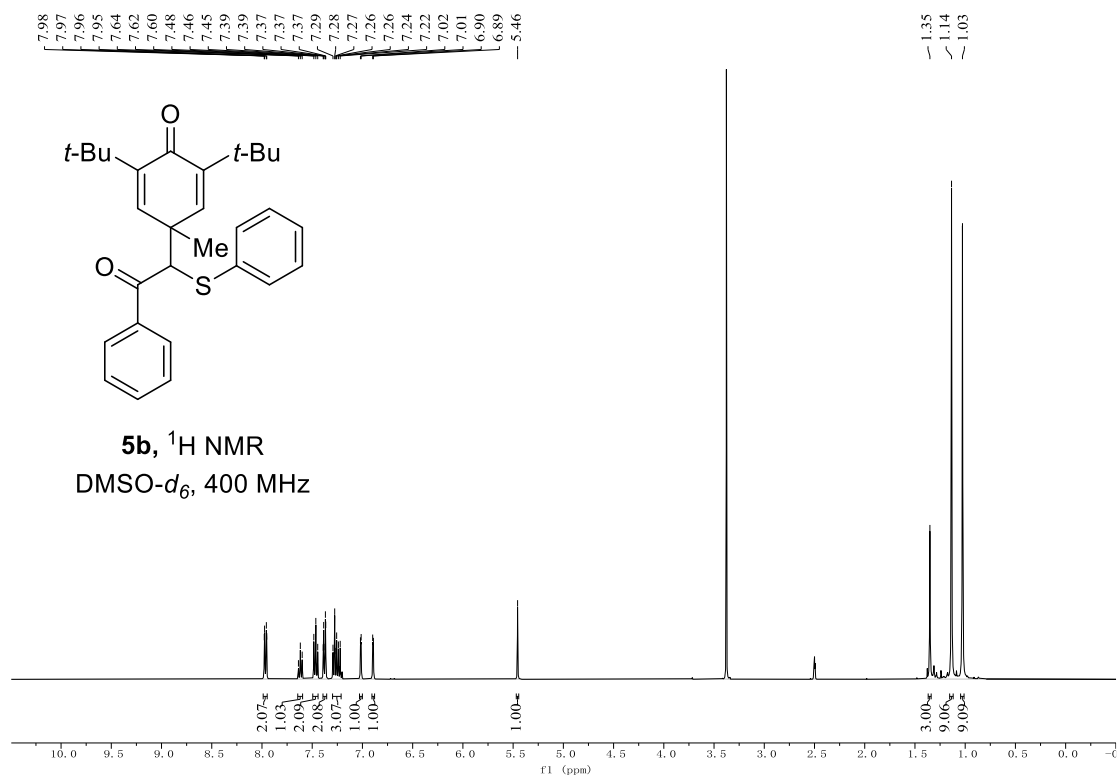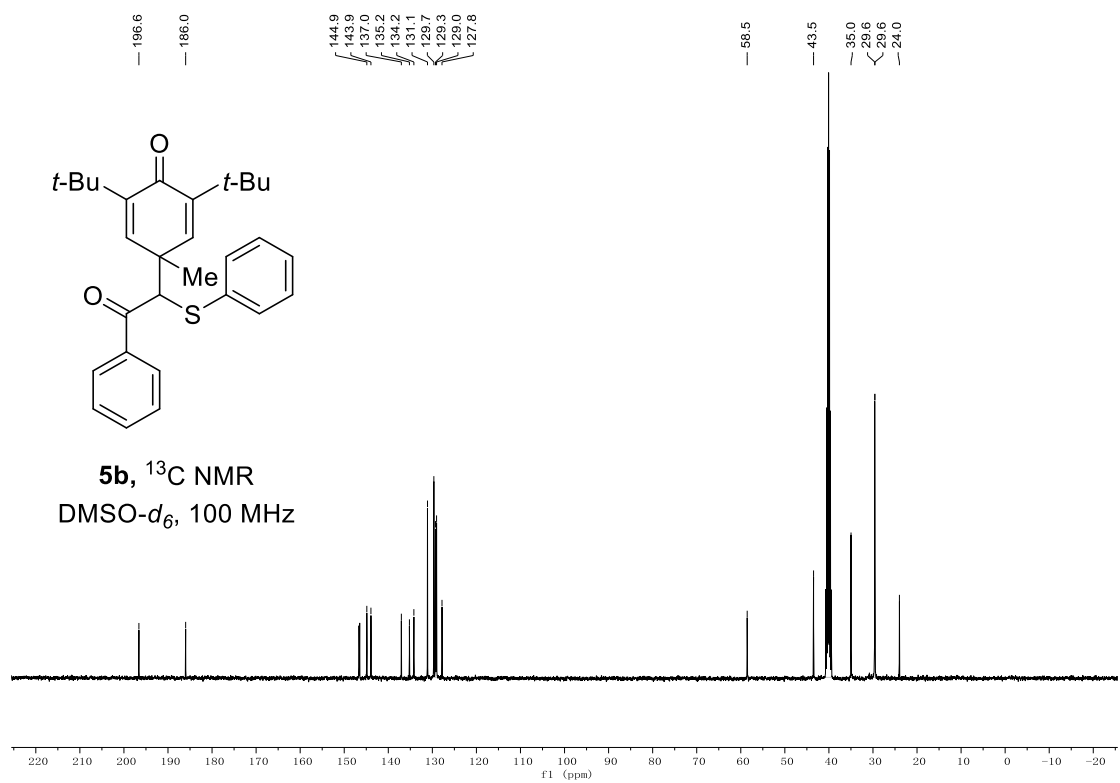



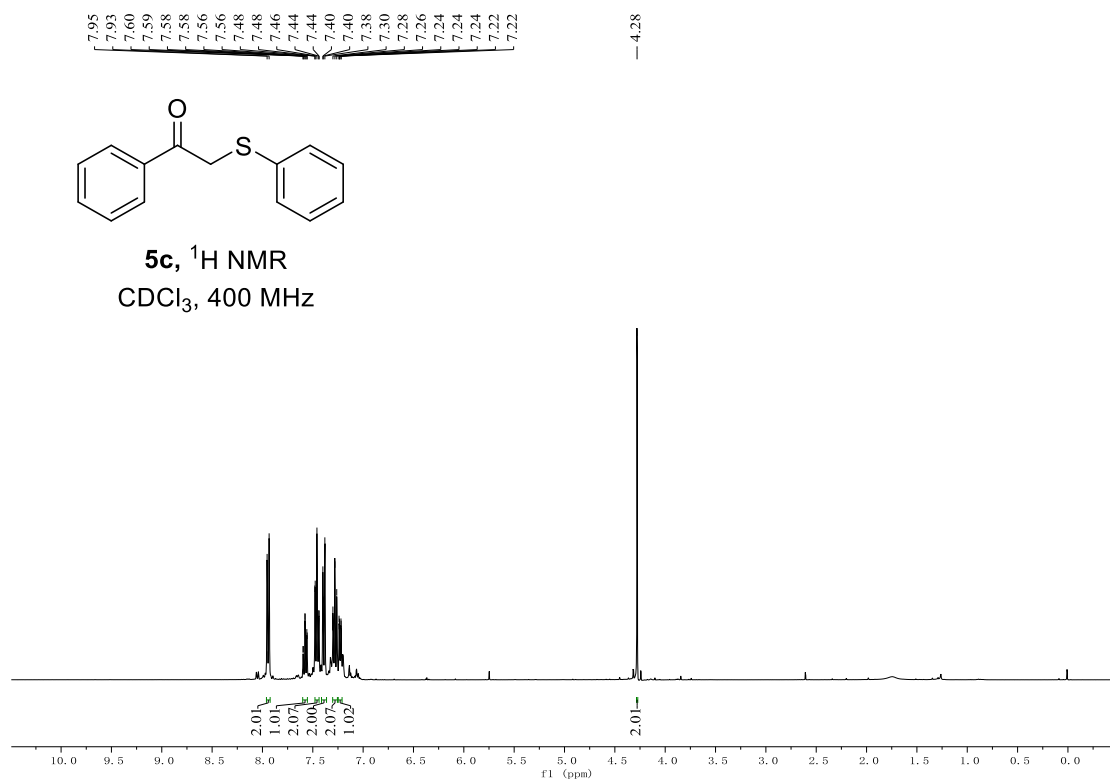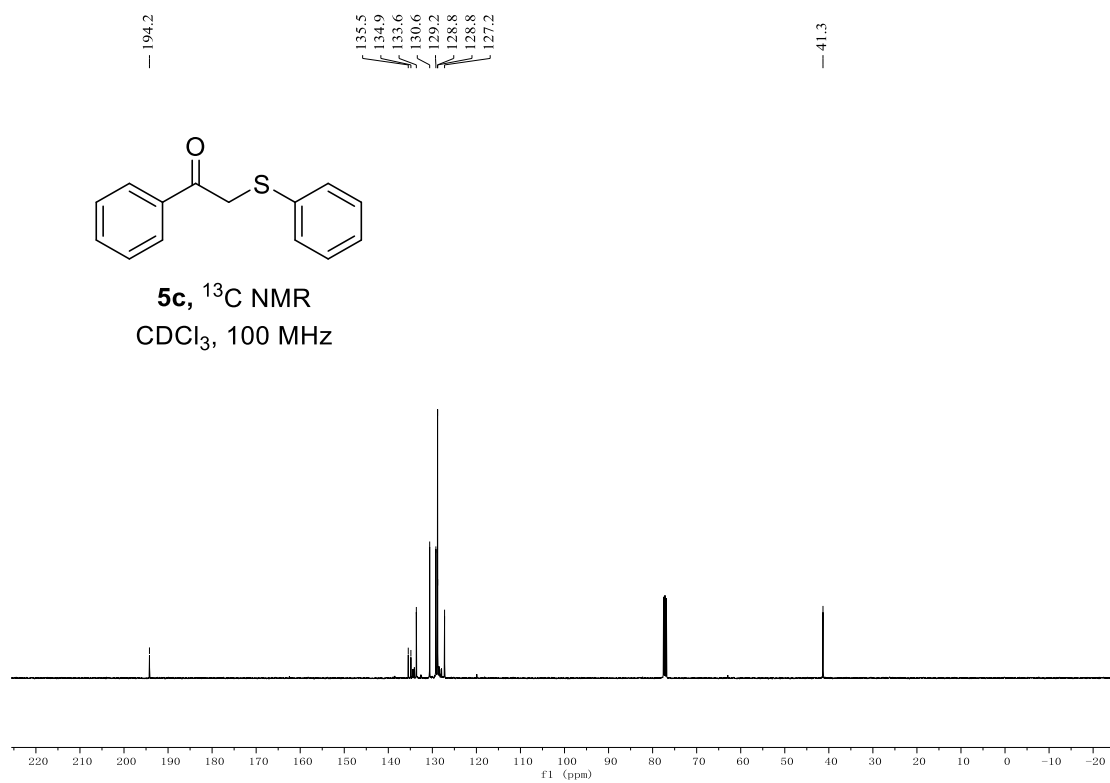

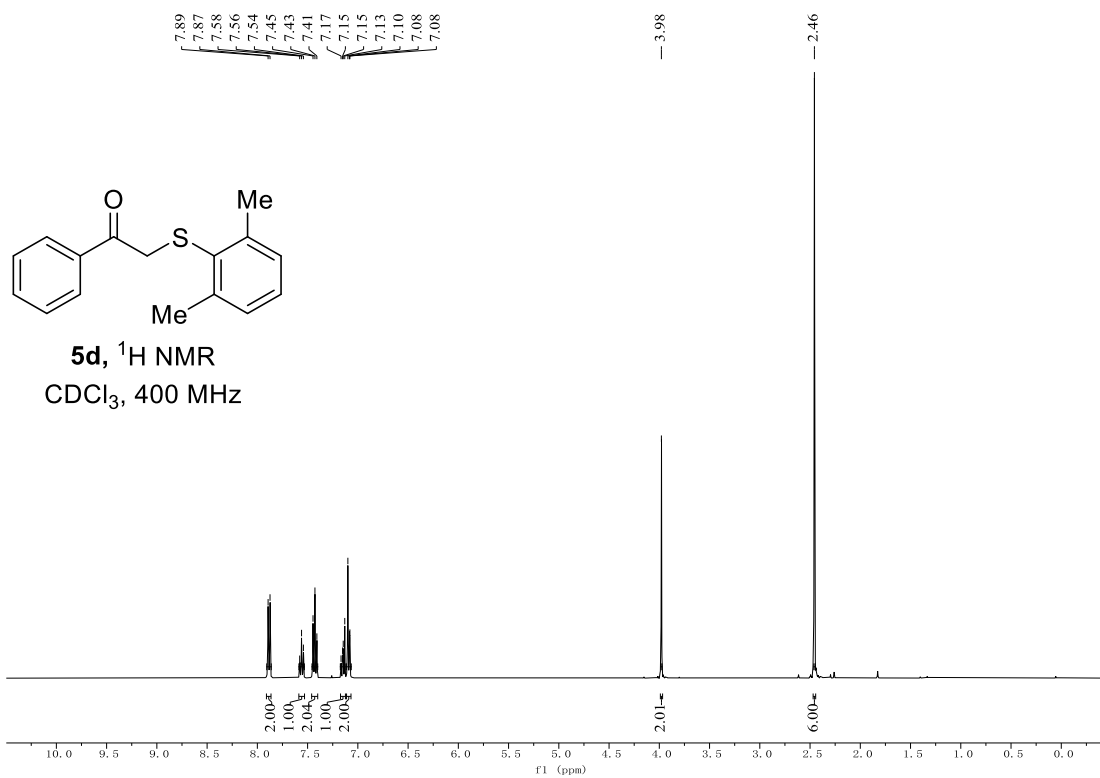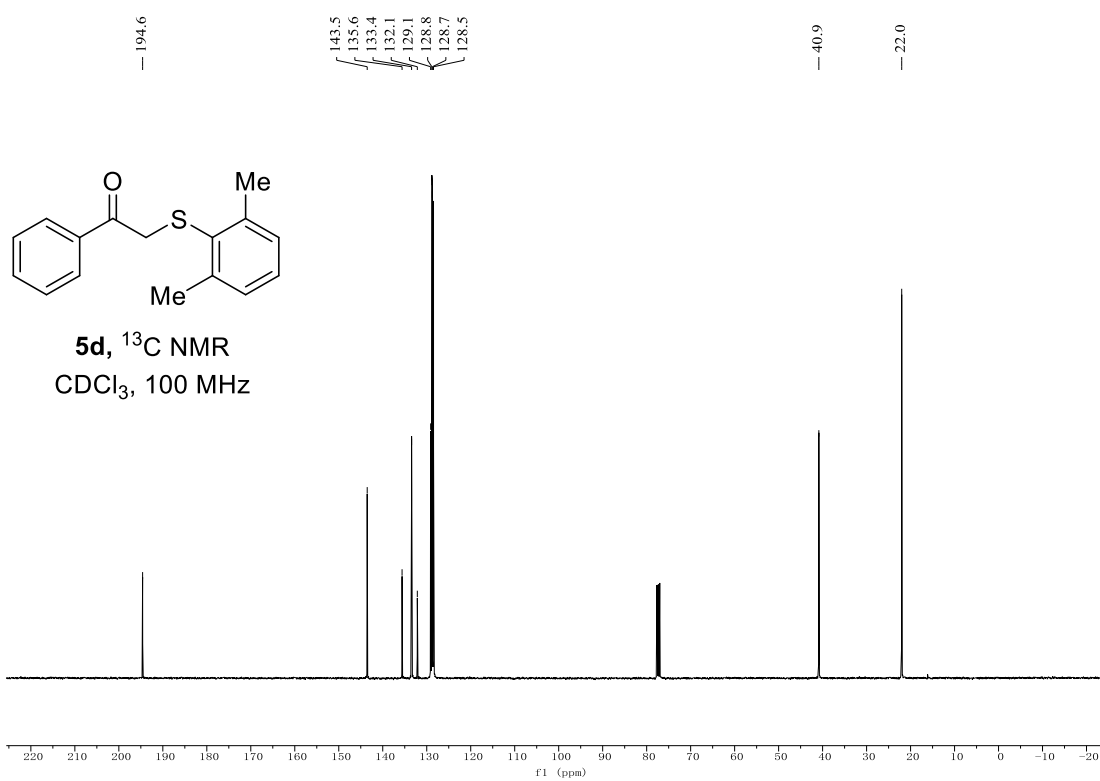

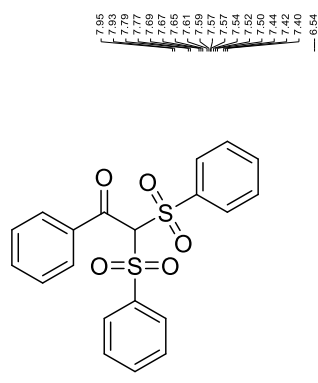

**6, <sup>1</sup>H NMR**  
CDCl<sub>3</sub>, 400 MHz

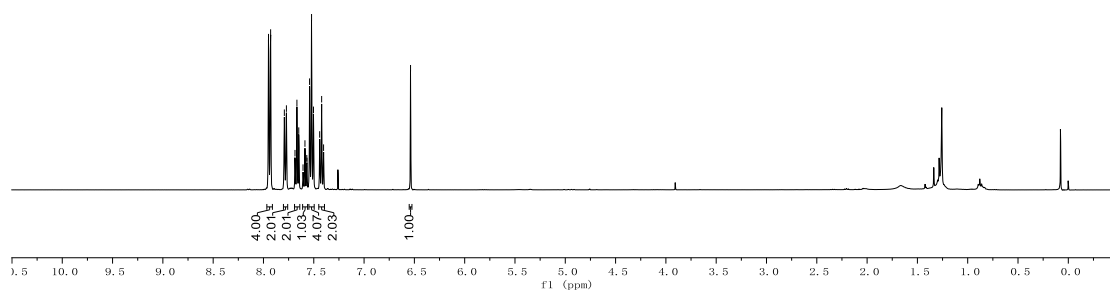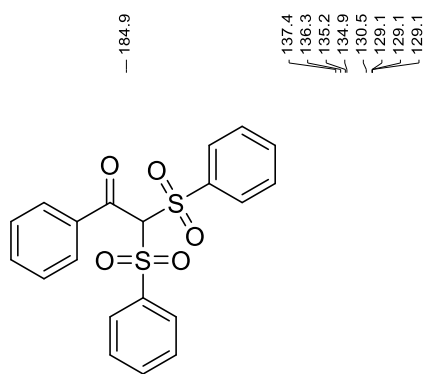

**6, <sup>13</sup>C NMR**  
CDCl<sub>3</sub>, 100 MHz

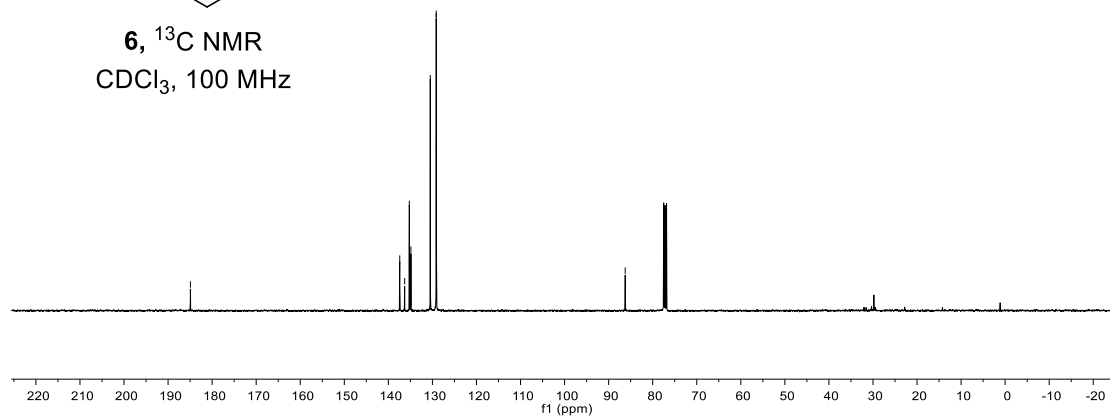

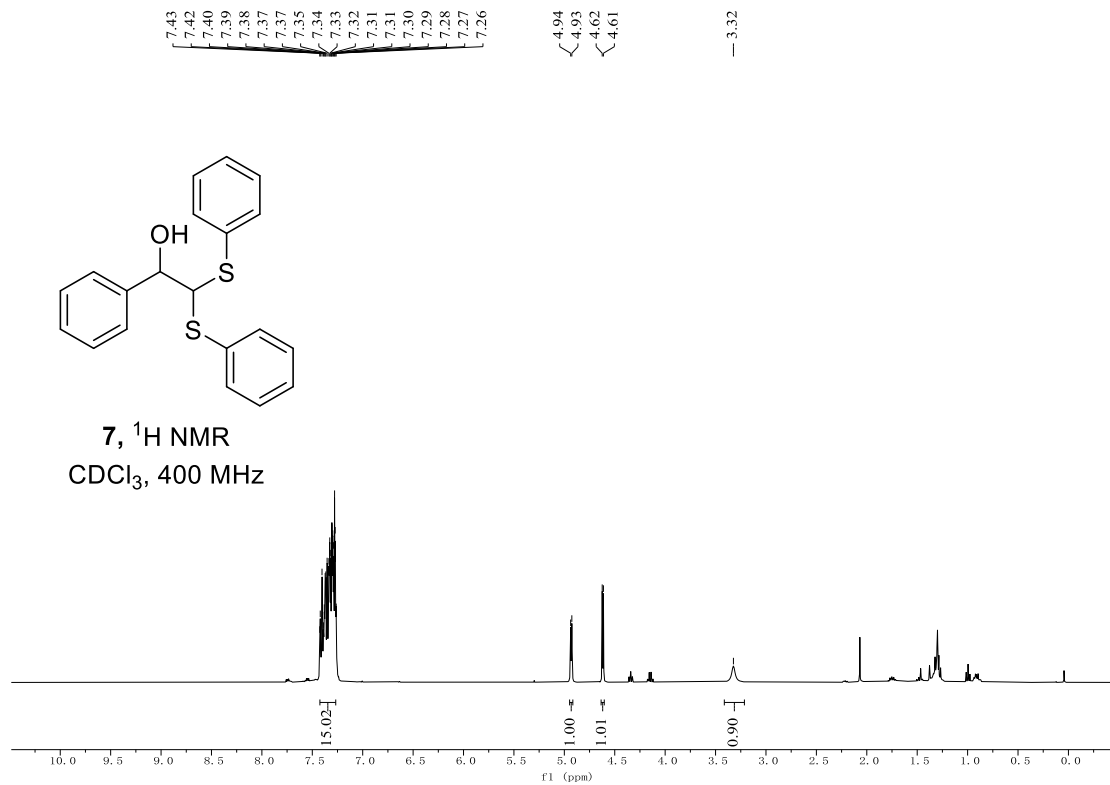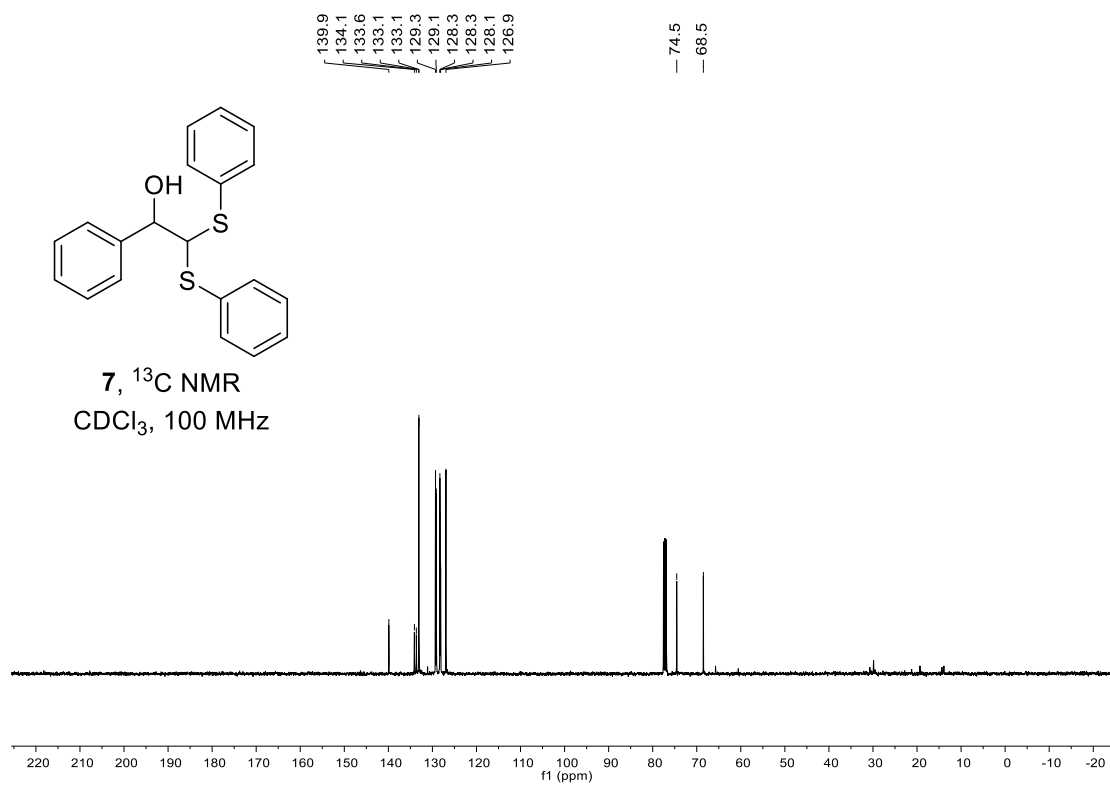

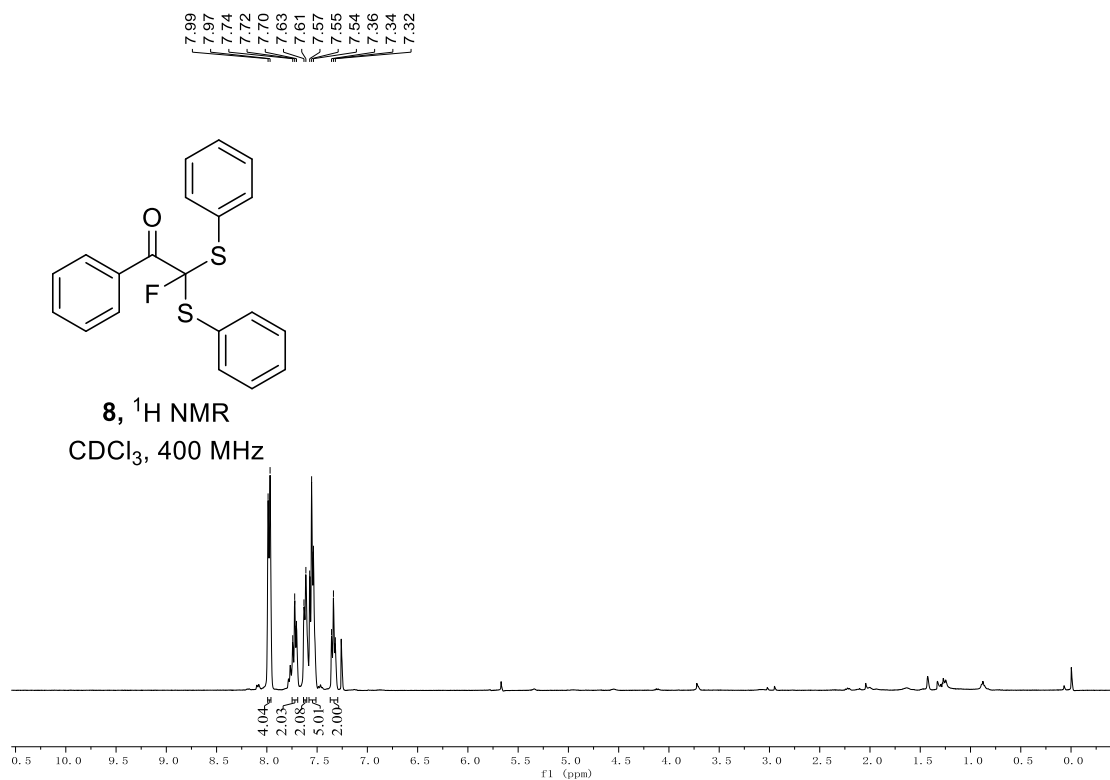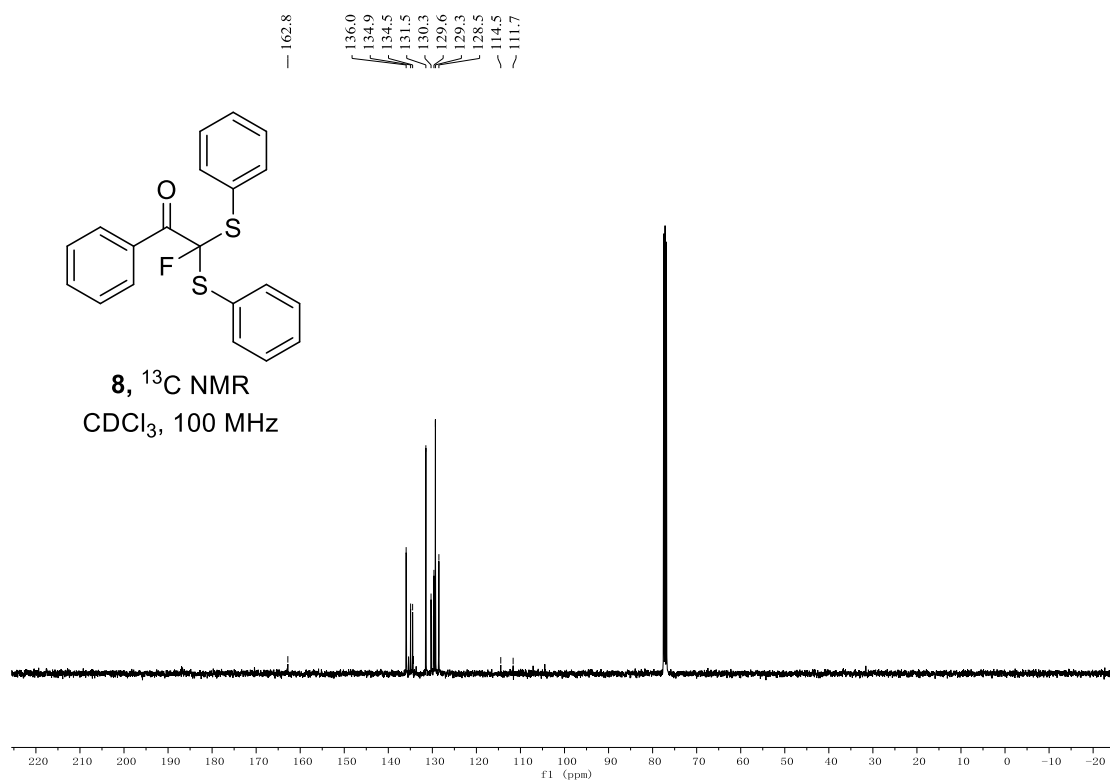

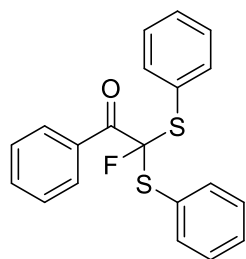

**8**,  $^{19}\text{F}$  NMR  
 $\text{CDCl}_3$ , 376 MHz

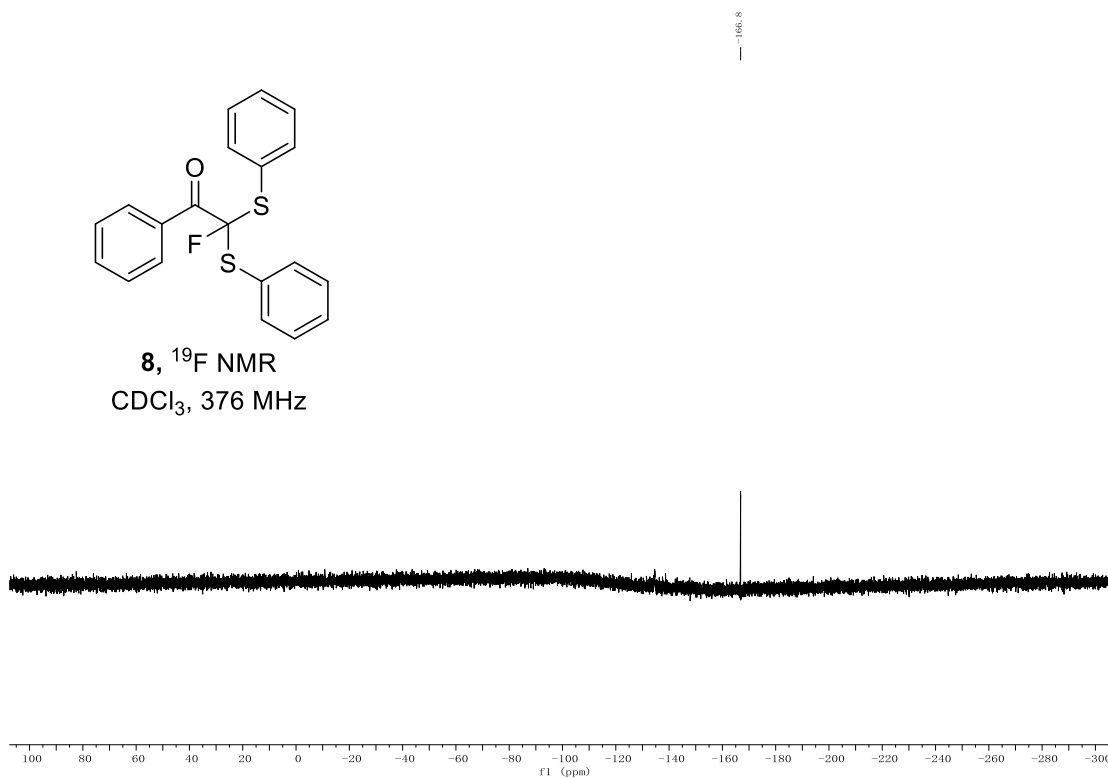

7.55  
7.53  
7.33  
7.31  
7.30  
7.28  
7.27  
7.26  
7.22  
7.21  
7.20  
7.19  
7.18  
7.18  
7.16  
7.16

-4.67

-3.30

-1.84

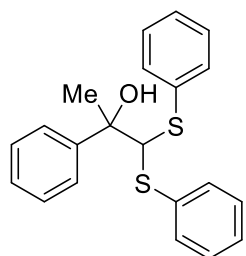

**9**,  $^1\text{H}$  NMR  
 $\text{CDCl}_3$ , 400 MHz

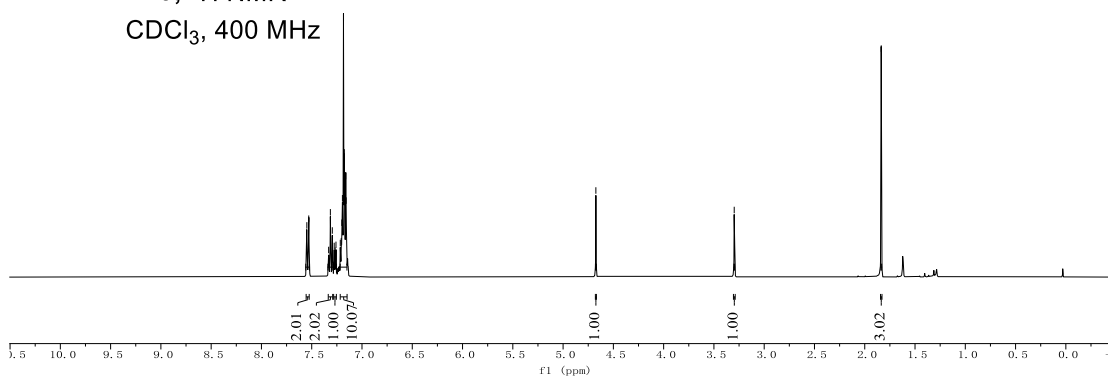

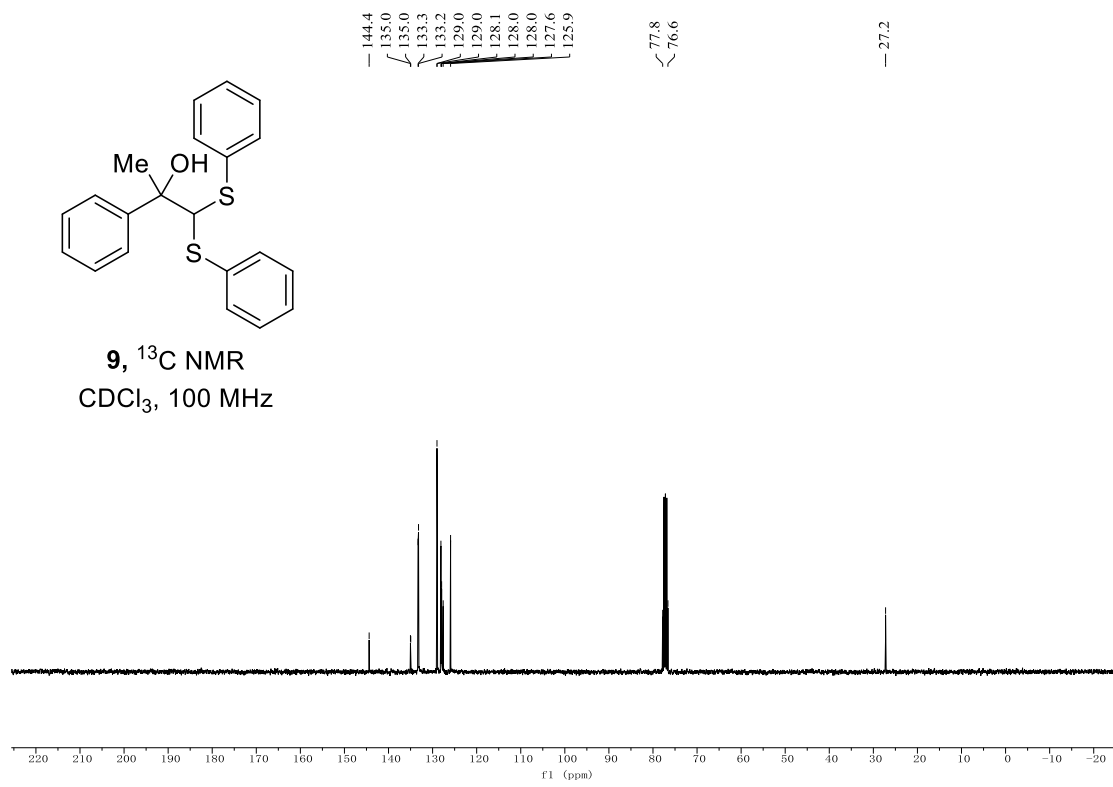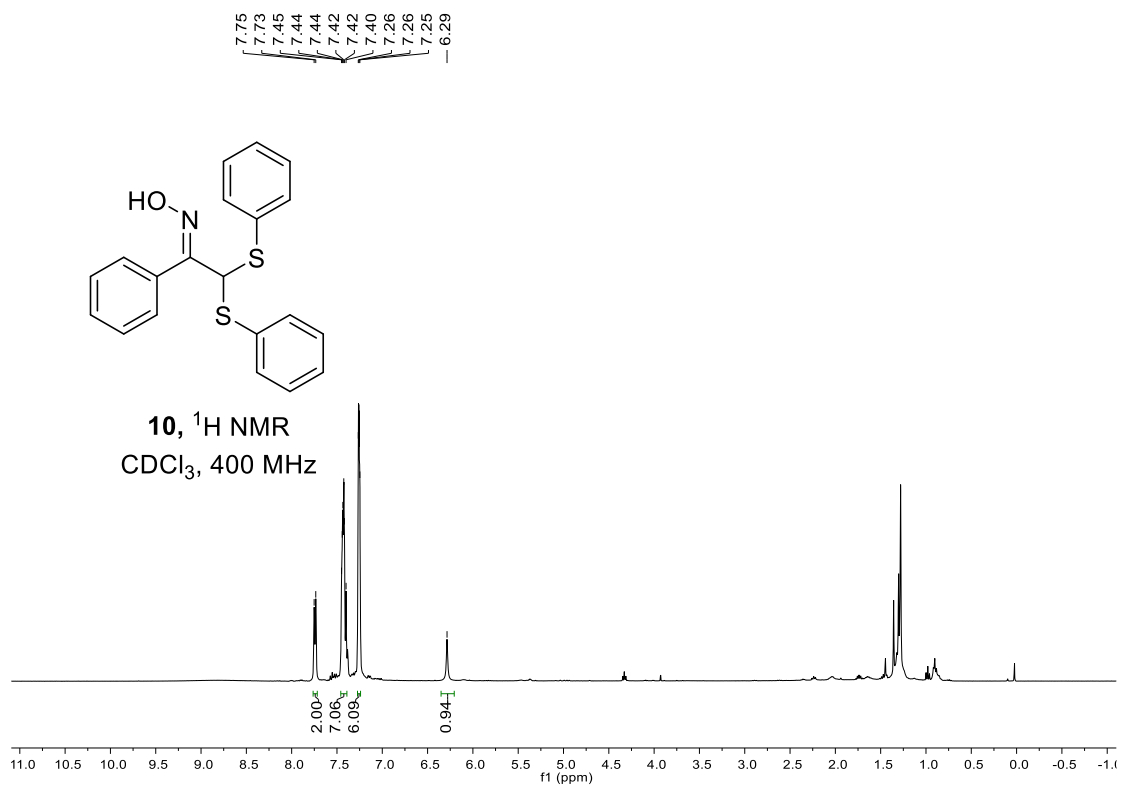

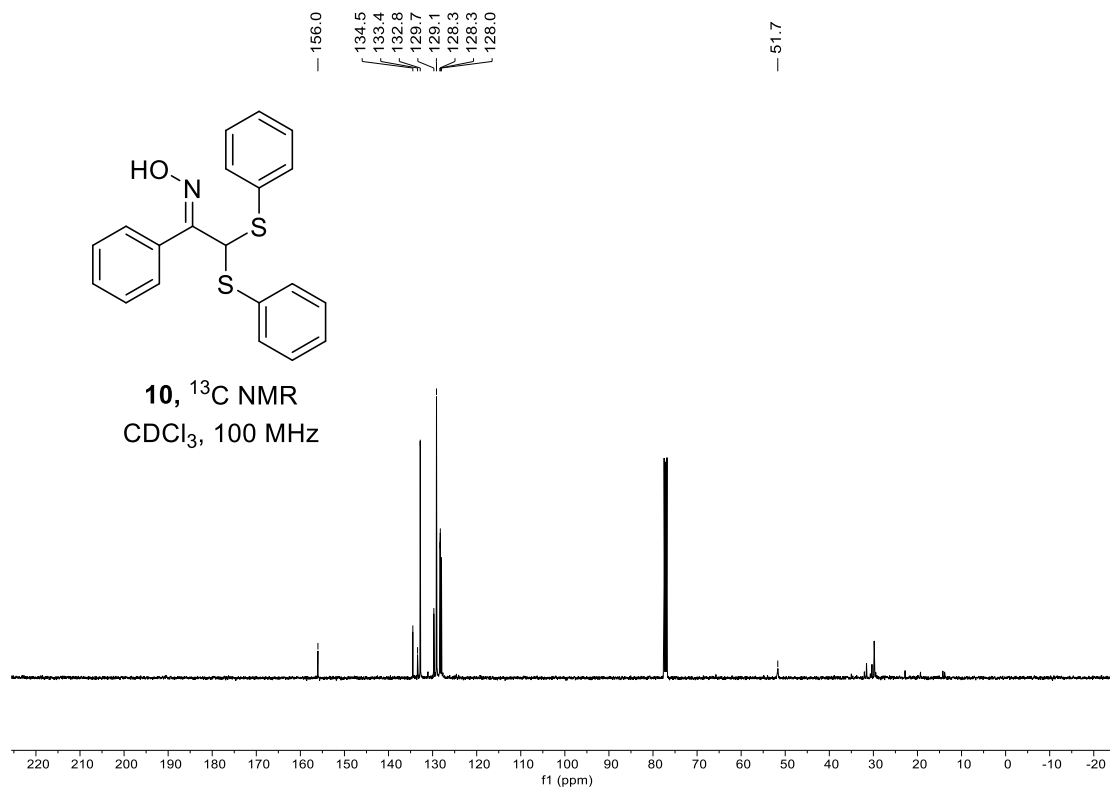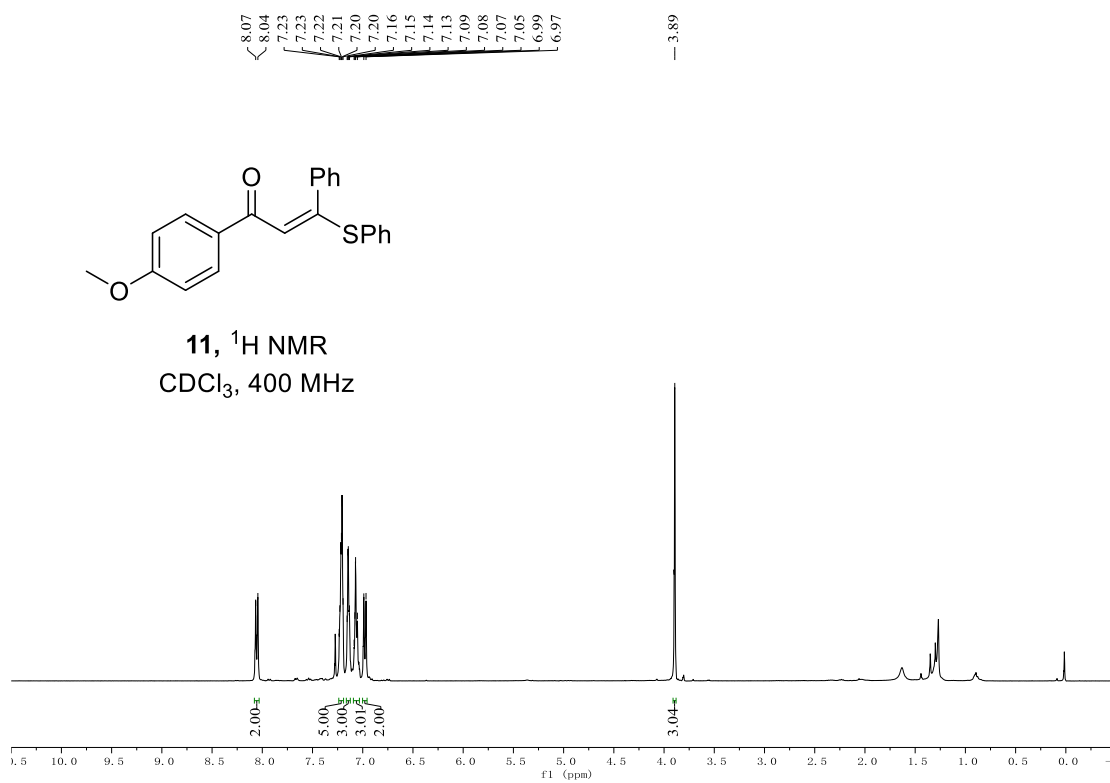



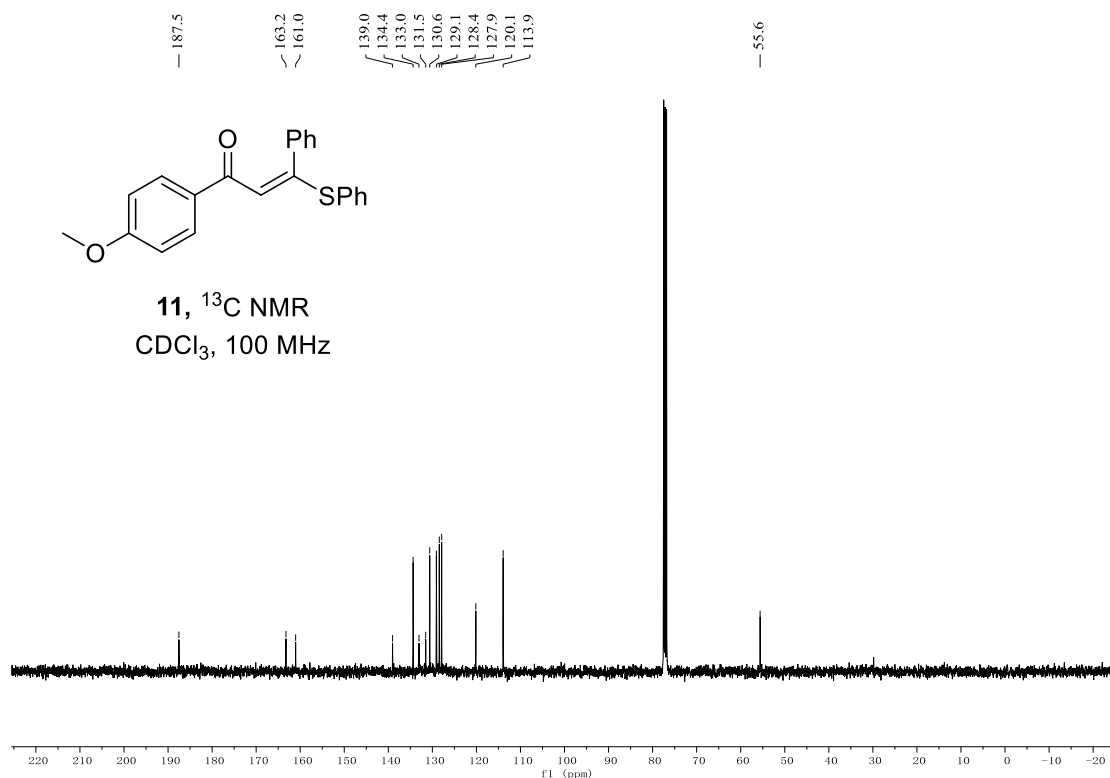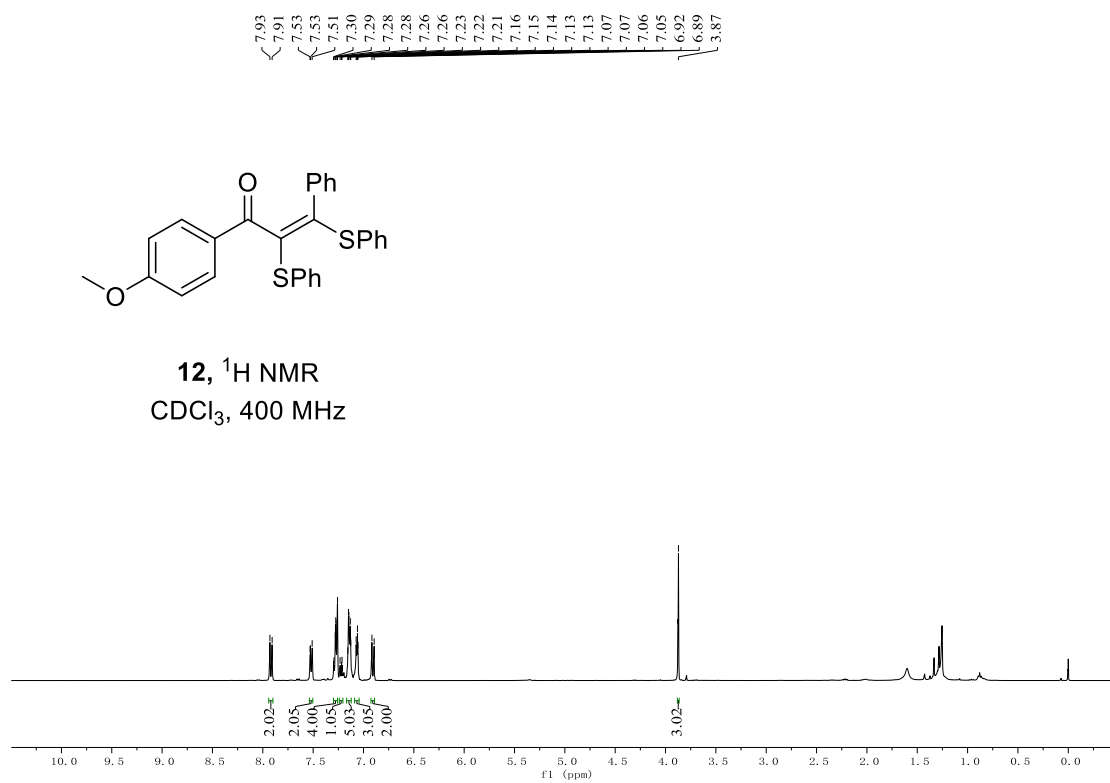

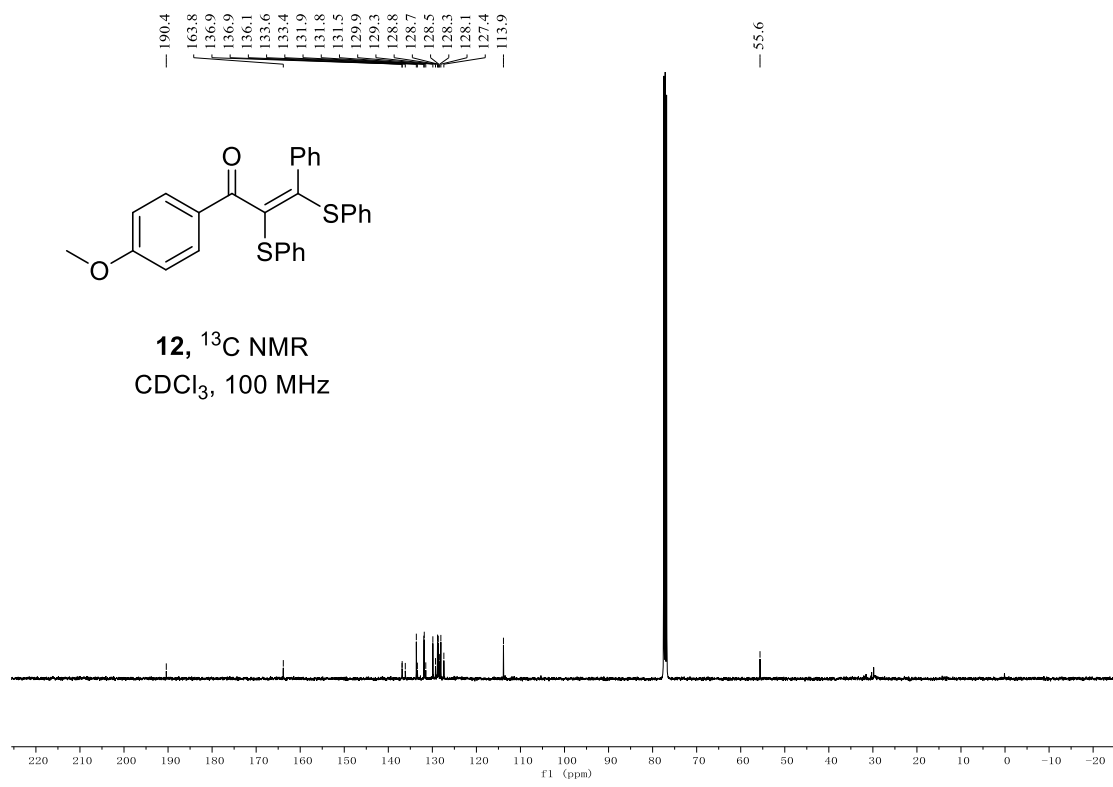

Supplement: d4cc02479f1.pdf [file d4cc02479f1.pdf]
